# Supplementary material for: An Updated Assessment of Chronic Hepatitis B Prevalence Among Foreign‐Born Persons Living in the United States
Source: PubMed Central journal article supplement — Hepatology. 2021 May 26;74(2):607–26. doi: 10.1002/hep.31782 (PMC8453838; doi:10.1002/hep.31782), 2021-05-26
Supplement: HEP-74-607-s001.pdf [file HEP-74-607-s001.pdf]

Appendix Table A1. Results of Systematic Review: HBsAg Seroprevalence Articles Identified in PubMed (2009–2019) by Country

| Country/Region | 2019 Country-Specific PubMed Searches   |                                     |                              |                                       |                                              |                                       |                                            | 2009 Meta-Analysis                        | 2019 Meta-Analysis                           |                                            |
|----------------|-----------------------------------------|-------------------------------------|------------------------------|---------------------------------------|----------------------------------------------|---------------------------------------|--------------------------------------------|-------------------------------------------|----------------------------------------------|--------------------------------------------|
|                | Articles Identified in Country Searches | Articles Excluded at Title Abstract | Full Text Articles Evaluated | Articles Excluded at Full Text Review | Eligible Articles from 2019 Country Searches | Eligible Articles from Other Sources* | Total Eligible Articles from 2019 Searches | Eligible Articles from 2009 Meta-Analysis | Total Articles in 2019 Country Meta-Analysis | Number of Surveys in Country Meta-Analysis |
| Asia           | 16,103                                  | 14,218                              | 1,885                        | 1,525                                 | 360                                          | 85                                    | 445                                        | 705                                       | 1,150                                        | 1,685                                      |
| Americas       | 1,007                                   | 743                                 | 264                          | 229                                   | 35                                           | 6                                     | 41                                         | 155                                       | 196                                          | 286                                        |
| Oceania        | 26                                      | 0                                   | 26                           | 21                                    | 5                                            | 5                                     | 10                                         | 20                                        | 30                                           | 62                                         |
| Africa         | 2,347                                   | 1,570                               | 777                          | 635                                   | 142                                          | 48                                    | 190                                        | 226                                       | 416                                          | 578                                        |
| Europe         | 830                                     | 598                                 | 232                          | 208                                   | 24                                           | 13                                    | 37                                         | 109                                       | 146                                          | 189                                        |
| All regions    | 20,313                                  | 17,129                              | 3,184                        | 2,618                                 | 566                                          | 157                                   | 723                                        | 1,215                                     | 1,938                                        | 2,800                                      |

Appendix Table A1—Continued

| Country/Region            | 2019 Country-Specific PubMed Searches   |                                     |                              |                                       |                                              |                                       |                                            | 2009 Meta-Analysis                        | 2019 Meta-Analysis                           |                                            |
|---------------------------|-----------------------------------------|-------------------------------------|------------------------------|---------------------------------------|----------------------------------------------|---------------------------------------|--------------------------------------------|-------------------------------------------|----------------------------------------------|--------------------------------------------|
|                           | Articles Identified in Country Searches | Articles Excluded at Title Abstract | Full Text Articles Evaluated | Articles Excluded at Full Text Review | Eligible Articles from 2019 Country Searches | Eligible Articles from Other Sources* | Total Eligible Articles from 2019 Searches | Eligible Articles from 2009 Meta-Analysis | Total Articles in 2019 Country Meta-Analysis | Number of Surveys in Country Meta-Analysis |
| <b>Asia</b>               | <b>16,103</b>                           | <b>14,218</b>                       | <b>1,885</b>                 | <b>1,525</b>                          | <b>360</b>                                   | <b>85</b>                             | <b>445</b>                                 | <b>705</b>                                | <b>1,150</b>                                 | <b>1,685</b>                               |
| <b>Eastern Asia</b>       | <b>9,446</b>                            | <b>8,637</b>                        | <b>809</b>                   | <b>645</b>                            | <b>164</b>                                   | <b>18</b>                             | <b>182</b>                                 | <b>281</b>                                | <b>463</b>                                   | <b>741</b>                                 |
| China (incl. Hong Kong)   | 6,670                                   | 6,156                               | 514                          | 405                                   | 109                                          | 2                                     | 111                                        | 118                                       | 229                                          | 362                                        |
| Taiwan                    | 1,094                                   | 974                                 | 120                          | 89                                    | 31                                           | 8                                     | 39                                         | 116                                       | 155                                          | 236                                        |
| Korea                     | 1,609                                   | 1,456                               | 153                          | 129                                   | 24                                           | 8                                     | 32                                         | 47                                        | 79                                           | 143                                        |
| Japan                     | —                                       | —                                   | —                            | —                                     | —                                            | —                                     | —                                          | —                                         | —                                            | —                                          |
| Eastern Asia, other/n.s.  | 73                                      | 51                                  | 22                           | 22                                    | 0                                            | 0                                     | 0                                          | 0                                         | 0                                            | 0                                          |
| <b>South Eastern Asia</b> | <b>3,395</b>                            | <b>2,951</b>                        | <b>444</b>                   | <b>384</b>                            | <b>60</b>                                    | <b>23</b>                             | <b>83</b>                                  | <b>147</b>                                | <b>230</b>                                   | <b>324</b>                                 |
| Philippines               | 83                                      | 60                                  | 23                           | 22                                    | 1                                            | 6                                     | 7                                          | 13                                        | 20                                           | 25                                         |
| Vietnam                   | 746                                     | 640                                 | 106                          | 92                                    | 14                                           | 3                                     | 17                                         | 38                                        | 55                                           | 80                                         |
| Thailand                  | 880                                     | 791                                 | 89                           | 77                                    | 12                                           | 3                                     | 15                                         | 36                                        | 51                                           | 75                                         |
| Laos                      | 36                                      | 17                                  | 19                           | 8                                     | 11                                           | 2                                     | 13                                         | 12                                        | 25                                           | 35                                         |
| Cambodia                  | 649                                     | 578                                 | 71                           | 66                                    | 5                                            | 1                                     | 6                                          | 12                                        | 18                                           | 23                                         |
| Indonesia                 | 104                                     | 79                                  | 25                           | 19                                    | 6                                            | 3                                     | 9                                          | 12                                        | 21                                           | 28                                         |
| Myanmar                   | 645                                     | 573                                 | 72                           | 66                                    | 6                                            | 1                                     | 7                                          | 4                                         | 11                                           | 11                                         |
| Malaysia                  | 89                                      | 66                                  | 23                           | 20                                    | 3                                            | 4                                     | 7                                          | 8                                         | 15                                           | 20                                         |
| Singapore                 | 163                                     | 147                                 | 16                           | 14                                    | 2                                            | 0                                     | 2                                          | 12                                        | 14                                           | 27                                         |
| <b>South Central Asia</b> | <b>1,985</b>                            | <b>1,560</b>                        | <b>425</b>                   | <b>340</b>                            | <b>85</b>                                    | <b>22</b>                             | <b>107</b>                                 | <b>158</b>                                | <b>265</b>                                   | <b>343</b>                                 |
| India                     | 825                                     | 696                                 | 129                          | 101                                   | 28                                           | 3                                     | 31                                         | 67                                        | 98                                           | 120                                        |
| Iran                      | 650                                     | 529                                 | 121                          | 97                                    | 24                                           | 4                                     | 28                                         | 17                                        | 45                                           | 63                                         |
| Pakistan                  | 275                                     | 194                                 | 81                           | 58                                    | 23                                           | 5                                     | 28                                         | 25                                        | 53                                           | 71                                         |
| Bangladesh                | 99                                      | 72                                  | 27                           | 23                                    | 4                                            | 5                                     | 9                                          | 17                                        | 26                                           | 31                                         |
| Afghanistan               | 34                                      | 12                                  | 22                           | 19                                    | 3                                            | 5                                     | 8                                          | 5                                         | 13                                           | 16                                         |
| Uzbekistan                | 9                                       | 4                                   | 5                            | 5                                     | 0                                            | 0                                     | 0                                          | 9                                         | 9                                            | 10                                         |
| Nepal                     | 36                                      | 19                                  | 17                           | 14                                    | 3                                            | 0                                     | 3                                          | 15                                        | 18                                           | 26                                         |
| Sri Lanka                 | 22                                      | 13                                  | 9                            | 9                                     | 0                                            | 0                                     | 0                                          | 1                                         | 1                                            | 2                                          |
| Kazakhstan                | 17                                      | 10                                  | 7                            | 7                                     | 0                                            | 0                                     | 0                                          | 2                                         | 2                                            | 4                                          |
| So Cen Asia, other/n.s.   | 18                                      | 11                                  | 7                            | 7                                     | 0                                            | 0                                     | 0                                          | 0                                         | 0                                            | 0                                          |
| <b>Western Asia</b>       | <b>1,277</b>                            | <b>1,070</b>                        | <b>207</b>                   | <b>156</b>                            | <b>51</b>                                    | <b>22</b>                             | <b>73</b>                                  | <b>119</b>                                | <b>192</b>                                   | <b>277</b>                                 |
| Iraq                      | 25                                      | 10                                  | 15                           | 11                                    | 4                                            | 5                                     | 9                                          | 2                                         | 11                                           | 11                                         |
| Israel                    | 121                                     | 100                                 | 21                           | 17                                    | 4                                            | 0                                     | 4                                          | 9                                         | 13                                           | 21                                         |
| Lebanon                   | 27                                      | 21                                  | 6                            | 4                                     | 2                                            | 1                                     | 3                                          | 6                                         | 9                                            | 11                                         |
| Turkey                    | 538                                     | 469                                 | 69                           | 47                                    | 22                                           | 7                                     | 29                                         | 59                                        | 88                                           | 115                                        |
| Armenia                   | 7                                       | 7                                   | 0                            | 0                                     | 0                                            | 1                                     | 1                                          | 3                                         | 4                                            | 5                                          |
| Syria                     | 22                                      | 12                                  | 10                           | 6                                     | 4                                            | 3                                     | 7                                          | 1                                         | 8                                            | 10                                         |
| Jordan                    | 21                                      | 17                                  | 4                            | 4                                     | 0                                            | 0                                     | 0                                          | 4                                         | 4                                            | 8                                          |
| Saudi Arabia              | 232                                     | 201                                 | 31                           | 24                                    | 7                                            | 1                                     | 8                                          | 22                                        | 30                                           | 64                                         |
| Yemen                     | 17                                      | 8                                   | 9                            | 5                                     | 4                                            | 0                                     | 4                                          | 7                                         | 11                                           | 17                                         |
| Kuwait                    | 10                                      | 6                                   | 4                            | 3                                     | 1                                            | 0                                     | 1                                          | 2                                         | 3                                            | 3                                          |
| Azerbaijan                | 10                                      | 6                                   | 4                            | 1                                     | 3                                            | 2                                     | 5                                          | 2                                         | 7                                            | 8                                          |
| Georgia                   | 160                                     | 144                                 | 16                           | 16                                    | 0                                            | 2                                     | 2                                          | 2                                         | 4                                            | 4                                          |
| Western Asia, other/n.s.  | 87                                      | 69                                  | 18                           | 18                                    | 0                                            | 0                                     | 0                                          | 0                                         | 0                                            | 0                                          |
| Asia, not specified       | 0                                       | 0                                   | 0                            | 0                                     | 0                                            | 0                                     | 0                                          | 0                                         | 0                                            | 0                                          |

Appendix Table A1—Continued

| Country/Region                 | 2019 Country-Specific PubMed Searches   |                                     |                              |                                       |                                              |                                       |                                            | 2009 Meta-Analysis                        | 2019 Meta-Analysis                           |                                            |
|--------------------------------|-----------------------------------------|-------------------------------------|------------------------------|---------------------------------------|----------------------------------------------|---------------------------------------|--------------------------------------------|-------------------------------------------|----------------------------------------------|--------------------------------------------|
|                                | Articles Identified in Country Searches | Articles Excluded at Title Abstract | Full Text Articles Evaluated | Articles Excluded at Full Text Review | Eligible Articles from 2019 Country Searches | Eligible Articles from Other Sources* | Total Eligible Articles from 2019 Searches | Eligible Articles from 2009 Meta-Analysis | Total Articles in 2019 Country Meta-Analysis | Number of Surveys in Country Meta-Analysis |
| <b>Americas</b>                | <b>1,007</b>                            | <b>743</b>                          | <b>264</b>                   | <b>229</b>                            | <b>35</b>                                    | <b>6</b>                              | <b>41</b>                                  | <b>155</b>                                | <b>196</b>                                   | <b>286</b>                                 |
| <b>Central America</b>         | <b>132</b>                              | <b>77</b>                           | <b>55</b>                    | <b>49</b>                             | <b>6</b>                                     | <b>3</b>                              | <b>9</b>                                   | <b>35</b>                                 | <b>44</b>                                    | <b>72</b>                                  |
| Mexico                         | 105                                     | 60                                  | 45                           | 43                                    | 2                                            | 2                                     | 4                                          | 14                                        | 18                                           | 27                                         |
| El Salvador                    | 2                                       | 2                                   | 0                            | 0                                     | 0                                            | 0                                     | 0                                          | 3                                         | 3                                            | 7                                          |
| Guatemala                      | 7                                       | 4                                   | 3                            | 1                                     | 2                                            | 0                                     | 2                                          | 6                                         | 8                                            | 9                                          |
| Honduras                       | 2                                       | 1                                   | 1                            | 1                                     | 0                                            | 1                                     | 1                                          | 2                                         | 3                                            | 7                                          |
| Nicaragua                      | 2                                       | 1                                   | 1                            | 1                                     | 0                                            | 0                                     | 0                                          | 2                                         | 2                                            | 2                                          |
| Panama                         | 11                                      | 6                                   | 5                            | 3                                     | 2                                            | 0                                     | 2                                          | 4                                         | 6                                            | 11                                         |
| Costa Rica                     | 3                                       | 3                                   | 0                            | 0                                     | 0                                            | 0                                     | 0                                          | 1                                         | 1                                            | 2                                          |
| Belize                         | 0                                       | 0                                   | 0                            | 0                                     | 0                                            | 0                                     | 0                                          | 3                                         | 3                                            | 7                                          |
| <b>Caribbean</b>               | <b>59</b>                               | <b>44</b>                           | <b>15</b>                    | <b>12</b>                             | <b>3</b>                                     | <b>2</b>                              | <b>5</b>                                   | <b>29</b>                                 | <b>34</b>                                    | <b>40</b>                                  |
| Cuba                           | 27                                      | 23                                  | 4                            | 4                                     | 0                                            | 1                                     | 1                                          | 5                                         | 6                                            | 7                                          |
| Dominican Republic             | 8                                       | 6                                   | 2                            | 1                                     | 1                                            | 0                                     | 1                                          | 6                                         | 7                                            | 8                                          |
| Jamaica                        | 7                                       | 5                                   | 2                            | 2                                     | 0                                            | 0                                     | 0                                          | 4                                         | 4                                            | 4                                          |
| Haiti                          | 16                                      | 9                                   | 7                            | 5                                     | 2                                            | 1                                     | 3                                          | 11                                        | 14                                           | 16                                         |
| Trinidad and Tobago            | 1                                       | 1                                   | 0                            | 0                                     | 0                                            | 0                                     | 0                                          | 1                                         | 1                                            | 2                                          |
| Barbados                       | 0                                       | 0                                   | 0                            | 0                                     | 0                                            | 0                                     | 0                                          | 2                                         | 2                                            | 3                                          |
| Caribbean, other/n.s.          | 0                                       | 0                                   | 0                            | 0                                     | 0                                            | 0                                     | 0                                          | 0                                         | 0                                            | 0                                          |
| <b>South America</b>           | <b>816</b>                              | <b>622</b>                          | <b>194</b>                   | <b>168</b>                            | <b>26</b>                                    | <b>1</b>                              | <b>27</b>                                  | <b>91</b>                                 | <b>118</b>                                   | <b>174</b>                                 |
| Colombia                       | 44                                      | 24                                  | 20                           | 19                                    | 1                                            | 0                                     | 1                                          | 3                                         | 4                                            | 4                                          |
| Ecuador                        | 5                                       | 4                                   | 1                            | 1                                     | 0                                            | 0                                     | 0                                          | 3                                         | 3                                            | 12                                         |
| Peru                           | 42                                      | 25                                  | 17                           | 15                                    | 2                                            | 0                                     | 2                                          | 11                                        | 13                                           | 25                                         |
| Brazil                         | 538                                     | 414                                 | 124                          | 104                                   | 20                                           | 1                                     | 21                                         | 50                                        | 71                                           | 90                                         |
| Guyana                         | 2                                       | 1                                   | 1                            | 0                                     | 1                                            | 0                                     | 1                                          | 0                                         | 1                                            | 1                                          |
| Argentina                      | 97                                      | 86                                  | 11                           | 9                                     | 2                                            | 0                                     | 2                                          | 4                                         | 6                                            | 11                                         |
| Venezuela                      | 18                                      | 13                                  | 5                            | 5                                     | 0                                            | 0                                     | 0                                          | 8                                         | 8                                            | 10                                         |
| Chile                          | 32                                      | 29                                  | 3                            | 3                                     | 0                                            | 0                                     | 0                                          | 4                                         | 4                                            | 5                                          |
| Bolivia                        | 9                                       | 6                                   | 3                            | 3                                     | 0                                            | 0                                     | 0                                          | 4                                         | 4                                            | 4                                          |
| Uruguay                        | 13                                      | 10                                  | 3                            | 3                                     | 0                                            | 0                                     | 0                                          | 2                                         | 2                                            | 6                                          |
| Paraguay                       | 9                                       | 6                                   | 3                            | 3                                     | 0                                            | 0                                     | 0                                          | 2                                         | 2                                            | 6                                          |
| South America, other/n.s.      | 7                                       | 4                                   | 3                            | 3                                     | 0                                            | 0                                     | 0                                          | 0                                         | 0                                            | 0                                          |
| <b>Northern America</b>        | <b>0</b>                                | <b>0</b>                            | <b>0</b>                     | <b>0</b>                              | <b>0</b>                                     | <b>0</b>                              | <b>0</b>                                   | <b>0</b>                                  | <b>0</b>                                     | <b>0</b>                                   |
| Canada                         | —                                       | —                                   | —                            | —                                     | —                                            | —                                     | —                                          | —                                         | —                                            | —                                          |
| Northern America, other/n.s.   | 0                                       | 0                                   | 0                            | 0                                     | 0                                            | 0                                     | 0                                          | 0                                         | 0                                            | 0                                          |
| <b>Americas, not specified</b> | <b>0</b>                                | <b>0</b>                            | <b>0</b>                     | <b>0</b>                              | <b>0</b>                                     | <b>0</b>                              | <b>0</b>                                   | <b>0</b>                                  | <b>0</b>                                     | <b>0</b>                                   |
| <b>Oceania</b>                 | <b>26</b>                               | <b>0</b>                            | <b>26</b>                    | <b>21</b>                             | <b>5</b>                                     | <b>5</b>                              | <b>10</b>                                  | <b>20</b>                                 | <b>30</b>                                    | <b>62</b>                                  |
| Australia                      | —                                       | —                                   | —                            | —                                     | —                                            | —                                     | —                                          | —                                         | —                                            | —                                          |
| New Zealand                    | —                                       | —                                   | —                            | —                                     | —                                            | —                                     | —                                          | —                                         | —                                            | —                                          |
| Fiji                           | 7                                       | 0                                   | 7                            | 5                                     | 2                                            | 2                                     | 4                                          | 3                                         | 7                                            | 16                                         |
| Tonga                          | 5                                       | 0                                   | 5                            | 4                                     | 1                                            | 1                                     | 2                                          | 5                                         | 7                                            | 11                                         |
| Micronesia                     | 11                                      | 0                                   | 11                           | 9                                     | 2                                            | 0                                     | 2                                          | 6                                         | 8                                            | 24                                         |
| Samoa                          | 3                                       | 0                                   | 3                            | 3                                     | 0                                            | 2                                     | 2                                          | 6                                         | 8                                            | 11                                         |
| Oceania, other/n.s.            | 0                                       | 0                                   | 0                            | 0                                     | 0                                            | 0                                     | 0                                          | 0                                         | 0                                            | 0                                          |

Appendix Table A1—Continued

| Country/Region               | 2019 Country-Specific PubMed Searches   |                                     |                              |                                       |                                              |                                       |                                            | 2009 Meta-Analysis                        | 2019 Meta-Analysis                           |                                            |
|------------------------------|-----------------------------------------|-------------------------------------|------------------------------|---------------------------------------|----------------------------------------------|---------------------------------------|--------------------------------------------|-------------------------------------------|----------------------------------------------|--------------------------------------------|
|                              | Articles Identified in Country Searches | Articles Excluded at Title Abstract | Full Text Articles Evaluated | Articles Excluded at Full Text Review | Eligible Articles from 2019 Country Searches | Eligible Articles from Other Sources* | Total Eligible Articles from 2019 Searches | Eligible Articles from 2009 Meta-Analysis | Total Articles in 2019 Country Meta-Analysis | Number of Surveys in Country Meta-Analysis |
| <b>Africa</b>                | <b>2,347</b>                            | <b>1,570</b>                        | <b>777</b>                   | <b>635</b>                            | <b>142</b>                                   | <b>48</b>                             | <b>190</b>                                 | <b>226</b>                                | <b>416</b>                                   | <b>578</b>                                 |
| <b>Eastern Africa</b>        | <b>375</b>                              | <b>234</b>                          | <b>141</b>                   | <b>104</b>                            | <b>37</b>                                    | <b>19</b>                             | <b>56</b>                                  | <b>70</b>                                 | <b>126</b>                                   | <b>189</b>                                 |
| Ethiopia                     | 123                                     | 72                                  | 51                           | 29                                    | 22                                           | 9                                     | 31                                         | 22                                        | 53                                           | 73                                         |
| Kenya                        | 59                                      | 43                                  | 16                           | 13                                    | 3                                            | 0                                     | 3                                          | 9                                         | 12                                           | 27                                         |
| Somalia                      | 18                                      | 5                                   | 13                           | 12                                    | 1                                            | 7                                     | 8                                          | 12                                        | 20                                           | 23                                         |
| Uganda                       | 68                                      | 41                                  | 27                           | 22                                    | 5                                            | 1                                     | 6                                          | 5                                         | 11                                           | 17                                         |
| Eritrea                      | 8                                       | 0                                   | 8                            | 6                                     | 2                                            | 2                                     | 4                                          | 1                                         | 5                                            | 6                                          |
| Tanzania                     | 53                                      | 39                                  | 14                           | 11                                    | 3                                            | 0                                     | 3                                          | 11                                        | 14                                           | 18                                         |
| Zimbabwe                     | 15                                      | 7                                   | 8                            | 7                                     | 1                                            | 0                                     | 1                                          | 10                                        | 11                                           | 25                                         |
| Eastern Africa, other/n.s.   | 31                                      | 27                                  | 4                            | 4                                     | 0                                            | 0                                     | 0                                          | 0                                         | 0                                            | 0                                          |
| <b>Middle Africa</b>         | <b>259</b>                              | <b>143</b>                          | <b>116</b>                   | <b>96</b>                             | <b>20</b>                                    | <b>3</b>                              | <b>23</b>                                  | <b>13</b>                                 | <b>36</b>                                    | <b>45</b>                                  |
| Cameroon                     | 106                                     | 60                                  | 46                           | 26                                    | 20                                           | 3                                     | 23                                         | 13                                        | 36                                           | 45                                         |
| Middle Africa, other/n.s.    | 153                                     | 83                                  | 70                           | 70                                    | 0                                            | 0                                     | 0                                          | 0                                         | 0                                            | 0                                          |
| <b>Northern Africa</b>       | <b>478</b>                              | <b>375</b>                          | <b>103</b>                   | <b>82</b>                             | <b>21</b>                                    | <b>8</b>                              | <b>29</b>                                  | <b>50</b>                                 | <b>79</b>                                    | <b>103</b>                                 |
| Egypt                        | 269                                     | 225                                 | 44                           | 31                                    | 13                                           | 2                                     | 15                                         | 32                                        | 47                                           | 63                                         |
| Morocco                      | 51                                      | 27                                  | 24                           | 19                                    | 5                                            | 1                                     | 6                                          | 4                                         | 10                                           | 12                                         |
| Sudan/South Sudan            | 60                                      | 41                                  | 19                           | 16                                    | 3                                            | 5                                     | 8                                          | 12                                        | 20                                           | 25                                         |
| Algeria                      | 15                                      | 7                                   | 8                            | 8                                     | 0                                            | 0                                     | 0                                          | 2                                         | 2                                            | 3                                          |
| Northern Africa, other/n.s.  | 83                                      | 75                                  | 8                            | 8                                     | 0                                            | 0                                     | 0                                          | 0                                         | 0                                            | 0                                          |
| <b>Southern Africa</b>       | <b>460</b>                              | <b>311</b>                          | <b>149</b>                   | <b>142</b>                            | <b>7</b>                                     | <b>0</b>                              | <b>7</b>                                   | <b>20</b>                                 | <b>27</b>                                    | <b>39</b>                                  |
| South Africa                 | 359                                     | 266                                 | 93                           | 86                                    | 7                                            | 0                                     | 7                                          | 20                                        | 27                                           | 39                                         |
| Southern Africa, other/n.s.  | 101                                     | 45                                  | 56                           | 56                                    | 0                                            | 0                                     | 0                                          | 0                                         | 0                                            | 0                                          |
| <b>Western Africa</b>        | <b>775</b>                              | <b>507</b>                          | <b>268</b>                   | <b>211</b>                            | <b>57</b>                                    | <b>18</b>                             | <b>75</b>                                  | <b>73</b>                                 | <b>148</b>                                   | <b>202</b>                                 |
| Nigeria                      | 270                                     | 178                                 | 92                           | 53                                    | 39                                           | 9                                     | 48                                         | 42                                        | 90                                           | 124                                        |
| Ghana                        | 119                                     | 72                                  | 47                           | 36                                    | 11                                           | 4                                     | 15                                         | 7                                         | 22                                           | 27                                         |
| Liberia                      | 3                                       | 0                                   | 3                            | 3                                     | 0                                            | 0                                     | 0                                          | 6                                         | 6                                            | 7                                          |
| Cape Verde                   | 1                                       | 1                                   | 0                            | 0                                     | 0                                            | 0                                     | 0                                          | 1                                         | 1                                            | 2                                          |
| Sierra Leone                 | 14                                      | 6                                   | 8                            | 6                                     | 2                                            | 3                                     | 5                                          | 4                                         | 9                                            | 12                                         |
| Senegal                      | 62                                      | 40                                  | 22                           | 18                                    | 4                                            | 2                                     | 6                                          | 10                                        | 16                                           | 24                                         |
| Guinea                       | 31                                      | 26                                  | 5                            | 4                                     | 1                                            | 0                                     | 1                                          | 3                                         | 4                                            | 6                                          |
| Western Africa, other/n.s.   | 275                                     | 184                                 | 91                           | 91                                    | 0                                            | 0                                     | 0                                          | 0                                         | 0                                            | 0                                          |
| <b>Africa, not specified</b> | <b>0</b>                                | <b>0</b>                            | <b>0</b>                     | <b>0</b>                              | <b>0</b>                                     | <b>0</b>                              | <b>0</b>                                   | <b>0</b>                                  | <b>0</b>                                     | <b>0</b>                                   |

Appendix Table A1—Continued

| Country/Region                 | 2019 Country-Specific PubMed Searches   |                                     |                              |                                       |                                              |                                       |                                            | 2009 Meta-Analysis                        | 2019 Meta-Analysis                           |                                            |
|--------------------------------|-----------------------------------------|-------------------------------------|------------------------------|---------------------------------------|----------------------------------------------|---------------------------------------|--------------------------------------------|-------------------------------------------|----------------------------------------------|--------------------------------------------|
|                                | Articles Identified in Country Searches | Articles Excluded at Title Abstract | Full Text Articles Evaluated | Articles Excluded at Full Text Review | Eligible Articles from 2019 Country Searches | Eligible Articles from Other Sources* | Total Eligible Articles from 2019 Searches | Eligible Articles from 2009 Meta-Analysis | Total Articles in 2019 Country Meta-Analysis | Number of Surveys in Country Meta-Analysis |
| <b>Europe</b>                  | <b>830</b>                              | <b>598</b>                          | <b>232</b>                   | <b>208</b>                            | <b>24</b>                                    | <b>13</b>                             | <b>37</b>                                  | <b>109</b>                                | <b>146</b>                                   | <b>189</b>                                 |
| <b>Eastern Europe</b>          | <b>830</b>                              | <b>598</b>                          | <b>232</b>                   | <b>208</b>                            | <b>24</b>                                    | <b>13</b>                             | <b>37</b>                                  | <b>109</b>                                | <b>146</b>                                   | <b>189</b>                                 |
| Poland                         | 197                                     | 155                                 | 42                           | 38                                    | 4                                            | 1                                     | 5                                          | 13                                        | 18                                           | 20                                         |
| Russia                         | 179                                     | 134                                 | 45                           | 40                                    | 5                                            | 1                                     | 6                                          | 15                                        | 21                                           | 26                                         |
| Ukraine                        | 26                                      | 13                                  | 13                           | 13                                    | 0                                            | 3                                     | 3                                          | 3                                         | 6                                            | 6                                          |
| Romania                        | 112                                     | 91                                  | 21                           | 17                                    | 4                                            | 2                                     | 6                                          | 18                                        | 24                                           | 35                                         |
| Yugoslavia                     | 7                                       | 5                                   | 2                            | 2                                     | 0                                            | 0                                     | 0                                          | 5                                         | 5                                            | 5                                          |
| Bosnia & Herzegovina           | 16                                      | 14                                  | 2                            | 1                                     | 1                                            | 1                                     | 2                                          | 1                                         | 3                                            | 4                                          |
| Hungary                        | 34                                      | 26                                  | 8                            | 8                                     | 0                                            | 0                                     | 0                                          | 3                                         | 3                                            | 3                                          |
| Albania                        | 22                                      | 7                                   | 15                           | 12                                    | 3                                            | 1                                     | 4                                          | 12                                        | 16                                           | 24                                         |
| Czech Republic & Slovakia      | 63                                      | 39                                  | 24                           | 20                                    | 4                                            | 0                                     | 4                                          | 9                                         | 13                                           | 15                                         |
| Belarus                        | 5                                       | 4                                   | 1                            | 1                                     | 0                                            | 1                                     | 1                                          | 4                                         | 5                                            | 5                                          |
| Bulgaria                       | 19                                      | 10                                  | 9                            | 7                                     | 2                                            | 0                                     | 2                                          | 5                                         | 7                                            | 13                                         |
| Moldova                        | 11                                      | 8                                   | 3                            | 3                                     | 0                                            | 1                                     | 1                                          | 4                                         | 5                                            | 6                                          |
| Croatia                        | 36                                      | 19                                  | 17                           | 16                                    | 1                                            | 0                                     | 1                                          | 4                                         | 5                                            | 6                                          |
| Former USSR                    | 0                                       | 0                                   | 0                            | 0                                     | 0                                            | 0                                     | 0                                          | 5                                         | 5                                            | 10                                         |
| Lithuania                      | 11                                      | 7                                   | 4                            | 4                                     | 0                                            | 1                                     | 1                                          | 6                                         | 7                                            | 7                                          |
| Latvia                         | 12                                      | 12                                  | 0                            | 0                                     | 0                                            | 0                                     | 0                                          | 2                                         | 2                                            | 3                                          |
| Macedonia                      | 6                                       | 5                                   | 1                            | 1                                     | 0                                            | 1                                     | 1                                          | 0                                         | 1                                            | 1                                          |
| Eastern Europe, other/n.s.     | 74                                      | 49                                  | 25                           | 25                                    | 0                                            | 0                                     | 0                                          | 0                                         | 0                                            | 0                                          |
| <b>Southern Europe</b>         | <b>0</b>                                | <b>0</b>                            | <b>0</b>                     | <b>0</b>                              | <b>0</b>                                     | <b>0</b>                              | <b>0</b>                                   | <b>0</b>                                  | <b>0</b>                                     | <b>0</b>                                   |
| Italy                          | —                                       | —                                   | —                            | —                                     | —                                            | —                                     | —                                          | —                                         | —                                            | —                                          |
| Portugal                       | —                                       | —                                   | —                            | —                                     | —                                            | —                                     | —                                          | —                                         | —                                            | —                                          |
| Greece                         | —                                       | —                                   | —                            | —                                     | —                                            | —                                     | —                                          | —                                         | —                                            | —                                          |
| Spain                          | —                                       | —                                   | —                            | —                                     | —                                            | —                                     | —                                          | —                                         | —                                            | —                                          |
| <b>Northern/Western Europe</b> | <b>0</b>                                | <b>0</b>                            | <b>0</b>                     | <b>0</b>                              | <b>0</b>                                     | <b>0</b>                              | <b>0</b>                                   | <b>0</b>                                  | <b>0</b>                                     | <b>0</b>                                   |
| United Kingdom                 | —                                       | —                                   | —                            | —                                     | —                                            | —                                     | —                                          | —                                         | —                                            | —                                          |
| Germany                        | —                                       | —                                   | —                            | —                                     | —                                            | —                                     | —                                          | —                                         | —                                            | —                                          |
| France                         | —                                       | —                                   | —                            | —                                     | —                                            | —                                     | —                                          | —                                         | —                                            | —                                          |
| Ireland                        | —                                       | —                                   | —                            | —                                     | —                                            | —                                     | —                                          | —                                         | —                                            | —                                          |
| Netherlands                    | —                                       | —                                   | —                            | —                                     | —                                            | —                                     | —                                          | —                                         | —                                            | —                                          |
| No./West Europe, other/n.s.    | —                                       | —                                   | —                            | —                                     | —                                            | —                                     | —                                          | —                                         | —                                            | —                                          |
| <b>Europe, not specified</b>   | <b>0</b>                                | <b>0</b>                            | <b>0</b>                     | <b>0</b>                              | <b>0</b>                                     | <b>0</b>                              | <b>0</b>                                   | <b>0</b>                                  | <b>0</b>                                     | <b>0</b>                                   |

Abbreviations: n.s., not specified.

Totals shown are the sum of country results and are not de-duplicated.

Individual country searches contain no duplicate records; regional duplicates were retained to allow tabulation of reviews for each country.

\*Other sources for a given country include articles found in searches for other countries and citations from reviews and articles found in PubMed searches.

For Japan, northern America, Australia, New Zealand, and southern, northern, and western Europe, which have low CHB rates and relatively modest numbers of emigrants to the U.S., rate from reviews were used instead of rates from systematic review and meta-analyses. Male-specific data and female-specific data from the same survey are entered separately and counted as two surveys.

## Appendix Table A2. PubMed Search Strategy

---

| <u>Search Description</u> | <u>PubMed Search Term</u>                                                                                  |
|---------------------------|------------------------------------------------------------------------------------------------------------|
| Country/demonym           | ([country] OR [demonym])<br>AND                                                                            |
| 2009 to 2019              | ("2009/01/01"[PDat] : "2019/12/31"[PDat])<br>AND                                                           |
| HBsAg                     | ((HBsAg)<br>OR                                                                                             |
| Hepatitis B               | ((hepatitis B)<br>AND                                                                                      |
| Type of study             | ((epidemiological studies) OR (prevalence) OR (seroprevalence) OR (migrant) OR (immigrant) OR (foreign)))) |

---

### Appendix Table A3. Criteria for Including a Survey in the 2019 Meta-Analysis

---

- Publication in a peer-reviewed journal (except as noted; e.g., government reports)
- Publication date Jan 1980 to Dec 2019
- Provide primary data on HBsAg seroprevalence for the general adult population or for population subgroups living in a country (e.g., pregnant women, military recruits, university students, civil service workers, visa applicants, factory workers, persons attending routine health exams)
- Provide primary data on HBsAg seroprevalence for emigrants (e.g., immigrants, refugees, asylum seekers, workers or adoptees) from the country to the U.S., Europe, or elsewhere
- Minimum sample size of 50 individuals
- Sample EXCLUDES groups at high risk for HBV such as:
  - Certain indigenous peoples (e.g., Inuit, Amazonian tribes)
  - Close contacts or family members of HBsAg-positive persons
  - HIV-positive persons or persons seeking HIV testing or counseling
  - Attendees at sexually transmitted disease clinics
  - Injection drug or non-injection users (e.g., patients in rehab)
  - Health care workers, including dentists, physicians, nurses, aides and other hospital personnel with patient contact; emergency medical personnel
  - Commercial sex workers
  - Psychiatric patients
  - Dialysis patients, multiply transfused persons, hemophiliacs
  - Persons with cancer, immunodeficiency disease, certain infectious diseases (e.g., schistosomiasis, leprosy, malaria, tuberculosis), or with diseases reported to have an association with HBV (e.g., diabetes, lichen planus, Sjogrens)
  - Occupations with blood exposure, including barbers, hairdressers, tattoo artists, waste handlers, morgue workers
  - Institutionalized persons (e.g., prisoners, institutionalized psychiatric patients or developmentally disabled)
- Studies of blood donors and other groups with HBV risk lower than the general population are excluded unless other data are limited or unavailable.
- Seroprevalence measured using any type of HBsAg assay was allowed (e.g., RPHA, CIEP, RIA, ELISA)
- Full text of paper available in English or sufficient information available from abstract, tables, and/or translation using Google Translate

---

*Abbreviations:* HBsAg, hepatitis B surface antigen; HBV, hepatitis B virus; RPHA, reverse passive hemagglutination; CIEP, counterimmunoelectrophoresis; RIA, radioimmunoassay; ELISA, enzyme-linked immunosorbent assay.

Appendix Table A4. Surveys Included in Meta-Analyses by Country: Total Sample Number and Sample Composition by Sex, Date, and Location

| Country/Region | FB Living in the U.S., 2018 | Total Sample in Surveys | Sample Composition by Sex |            |                   | Total Number of Surveys | Surveys by Date |           |           |           | Surveys by Location  |                    |
|----------------|-----------------------------|-------------------------|---------------------------|------------|-------------------|-------------------------|-----------------|-----------|-----------|-----------|----------------------|--------------------|
|                |                             |                         | Males                     | Females    | Sex Not Specified |                         | Before 1990     | 1990–1999 | 2000–2009 | 2010–2019 | Studies in Emigrants | Studies in Country |
| Asia           | 14,785,266                  | 106,772,038             | 29,956,751                | 63,921,096 | 12,894,191        | 1,685                   | 310             | 395       | 637       | 343       | 305                  | 1,380              |
| Americas       | 24,410,150                  | 2,868,724               | 101,004                   | 334,515    | 2,433,205         | 286                     | 51              | 128       | 81        | 26        | 27                   | 259                |
| Oceania        | 297,510                     | 77,311                  | 4,529                     | 37,315     | 35,467            | 62                      | 28              | 15        | 18        | 1         | 11                   | 51                 |
| Africa         | 2,575,550                   | 632,984                 | 251,468                   | 261,742    | 119,774           | 578                     | 165             | 115       | 123       | 175       | 66                   | 512                |
| Europe         | 5,894,567                   | 1,642,136               | 50,162                    | 526,312    | 1,065,662         | 189                     | 42              | 56        | 65        | 26        | 48                   | 141                |
| All regions    | 47,963,043                  | 111,993,193             | 30,363,914                | 65,080,980 | 16,548,299        | 2,800                   | 596             | 709       | 924       | 571       | 457                  | 2,343              |



Appendix Table A4—Continued

| Country/Region               | FB Living in the U.S., 2018 | Total Sample in Surveys | Sample Composition by Sex |                   |                   | Total Number of Surveys | Surveys by Date |            |            |            | Surveys by Location  |                    |
|------------------------------|-----------------------------|-------------------------|---------------------------|-------------------|-------------------|-------------------------|-----------------|------------|------------|------------|----------------------|--------------------|
|                              |                             |                         | Males                     | Females           | Sex Not Specified |                         | Before 1990     | 1990–1999  | 2000–2009  | 2010–2019  | Studies in Emigrants | Studies in Country |
| <b>Asia</b>                  | <b>14,785,266</b>           | <b>106,772,038</b>      | <b>29,956,751</b>         | <b>63,921,096</b> | <b>12,894,191</b> | <b>1,685</b>            | <b>310</b>      | <b>395</b> | <b>637</b> | <b>343</b> | <b>305</b>           | <b>1,380</b>       |
| <b>Eastern Asia</b>          | <b>4,639,824</b>            | <b>103,366,863</b>      | <b>29,195,519</b>         | <b>62,420,827</b> | <b>11,750,517</b> | <b>741</b>              | <b>122</b>      | <b>186</b> | <b>292</b> | <b>141</b> | <b>79</b>            | <b>662</b>         |
| China (including Hong Kong)  | 2,527,241                   | 78,458,637              | 22,575,107                | 44,589,077        | 11,294,453        | 362                     | 56              | 71         | 121        | 114        | 49                   | 313                |
| Taiwan                       | 404,329                     | 16,276,641              | 998,067                   | 15,134,310        | 144,264           | 236                     | 47              | 74         | 103        | 12         | 5                    | 231                |
| Korea                        | 1,133,728                   | 8,631,585               | 5,622,345                 | 2,697,440         | 311,800           | 143                     | 19              | 41         | 68         | 15         | 25                   | 118                |
| Japan                        | 560,538                     | —                       | —                         | —                 | —                 | —                       | —               | —          | —          | —          | —                    | —                  |
| Eastern Asia, other/n.s.     | 13,988                      | —                       | —                         | —                 | —                 | —                       | —               | —          | —          | —          | —                    | —                  |
| <b>South Eastern Asia</b>    | <b>4,529,616</b>            | <b>1,031,471</b>        | <b>99,506</b>             | <b>405,951</b>    | <b>526,014</b>    | <b>324</b>              | <b>96</b>       | <b>71</b>  | <b>103</b> | <b>54</b>  | <b>136</b>           | <b>188</b>         |
| Philippines                  | 2,168,566                   | 120,964                 | 32,005                    | 82,434            | 6,525             | 25                      | 10              | 3          | 10         | 2          | 12                   | 13                 |
| Vietnam                      | 1,365,908                   | 88,456                  | 16,517                    | 51,860            | 20,079            | 80                      | 23              | 21         | 26         | 10         | 51                   | 29                 |
| Thailand                     | 289,335                     | 332,550                 | 16,169                    | 69,028            | 247,353           | 75                      | 15              | 25         | 26         | 9          | 16                   | 59                 |
| Laos                         | 189,131                     | 39,719                  | 1,244                     | 23,812            | 14,663            | 35                      | 9               | 3          | 9          | 14         | 22                   | 13                 |
| Cambodia                     | 144,093                     | 16,431                  | 2,418                     | 9,089             | 4,924             | 23                      | 6               | 5          | 7          | 5          | 14                   | 9                  |
| Indonesia                    | 101,501                     | 32,532                  | 7,060                     | 23,792            | 1,680             | 28                      | 8               | 5          | 7          | 8          | 5                    | 23                 |
| Myanmar                      | 145,864                     | 19,494                  | 503                       | 8,651             | 10,340            | 11                      | 0               | 0          | 6          | 5          | 10                   | 1                  |
| Malaysia                     | 84,316                      | 273,000                 | 1,077                     | 60,269            | 211,654           | 20                      | 7               | 4          | 9          | 0          | 6                    | 14                 |
| Singapore                    | 40,902                      | 108,325                 | 22,513                    | 77,016            | 8,796             | 27                      | 18              | 5          | 3          | 1          | 0                    | 27                 |
| <b>South Central Asia</b>    | <b>4,264,431</b>            | <b>1,173,284</b>        | <b>321,870</b>            | <b>531,475</b>    | <b>319,939</b>    | <b>343</b>              | <b>40</b>       | <b>73</b>  | <b>148</b> | <b>82</b>  | <b>53</b>            | <b>290</b>         |
| India                        | 2,670,106                   | 508,284                 | 108,707                   | 281,722           | 117,855           | 120                     | 18              | 28         | 49         | 25         | 10                   | 110                |
| Iran                         | 397,203                     | 277,671                 | 74,105                    | 102,185           | 101,381           | 63                      | 3               | 3          | 34         | 23         | 3                    | 60                 |
| Pakistan                     | 400,978                     | 236,682                 | 78,540                    | 88,439            | 69,703            | 71                      | 3               | 7          | 42         | 19         | 12                   | 59                 |
| Bangladesh                   | 281,578                     | 72,227                  | 49,410                    | 15,739            | 7,078             | 31                      | 2               | 17         | 7          | 5          | 6                    | 25                 |
| Afghanistan                  | 119,003                     | 31,901                  | 3,498                     | 11,023            | 17,380            | 16                      | 1               | 0          | 8          | 7          | 13                   | 3                  |
| Uzbekistan                   | 74,008                      | 11,946                  | 579                       | 8,764             | 2,603             | 10                      | 4               | 3          | 3          | 0          | 2                    | 8                  |
| Nepal                        | 151,248                     | 31,962                  | 5,910                     | 22,521            | 3,531             | 26                      | 7               | 13         | 3          | 3          | 7                    | 19                 |
| Sri Lanka                    | 52,894                      | 1,913                   | 987                       | 926               | 0                 | 2                       | 0               | 2          | 0          | 0          | 0                    | 2                  |
| Kazakhstan                   | 30,431                      | 698                     | 134                       | 156               | 408               | 4                       | 2               | 0          | 2          | 0          | 0                    | 4                  |
| So. Central Asia, other/n.s. | 86,982                      | —                       | —                         | —                 | —                 | —                       | —               | —          | —          | —          | —                    | —                  |
| <b>Western Asia</b>          | <b>1,257,218</b>            | <b>1,200,420</b>        | <b>339,856</b>            | <b>562,843</b>    | <b>297,721</b>    | <b>277</b>              | <b>52</b>       | <b>65</b>  | <b>94</b>  | <b>66</b>  | <b>37</b>            | <b>240</b>         |
| Iraq                         | 250,435                     | 93,491                  | 70,824                    | 583               | 22,084            | 11                      | 0               | 0          | 5          | 6          | 8                    | 3                  |
| Israel                       | 163,156                     | 155,319                 | 41,708                    | 110,157           | 3,454             | 21                      | 6               | 5          | 1          | 9          | 0                    | 21                 |
| Lebanon                      | 135,345                     | 62,808                  | 19,660                    | 40,792            | 2,356             | 11                      | 1               | 5          | 3          | 2          | 4                    | 7                  |
| Turkey                       | 150,341                     | 539,763                 | 174,632                   | 320,254           | 44,877            | 115                     | 5               | 36         | 55         | 19         | 14                   | 101                |
| Armenia                      | 92,327                      | 16,975                  | 0                         | 15,245            | 1,730             | 5                       | 0               | 3          | 1          | 1          | 2                    | 3                  |
| Syria                        | 113,654                     | 60,048                  | 0                         | 13,171            | 46,877            | 10                      | 0               | 0          | 1          | 9          | 7                    | 3                  |
| Jordan                       | 87,888                      | 2,307                   | 261                       | 1,172             | 874               | 8                       | 5               | 0          | 3          | 0          | 0                    | 8                  |
| Saudi Arabia                 | 91,085                      | 244,084                 | 29,520                    | 53,027            | 161,537           | 64                      | 28              | 10         | 14         | 12         | 0                    | 64                 |
| Yemen                        | 64,556                      | 6,028                   | 2,936                     | 2,918             | 174               | 17                      | 4               | 5          | 5          | 3          | 0                    | 17                 |
| Kuwait                       | 39,318                      | 5,592                   | 0                         | 3,011             | 2,581             | 3                       | 1               | 0          | 1          | 1          | 0                    | 3                  |
| Azerbaijan                   | 23,015                      | 5,946                   | 315                       | 2,013             | 3,618             | 8                       | 2               | 1          | 3          | 2          | 1                    | 7                  |
| Georgia                      | 20,125                      | 8,059                   | 0                         | 500               | 7,559             | 4                       | 0               | 0          | 2          | 2          | 1                    | 3                  |
| Western Asia, other/n.s.     | 25,973                      | —                       | —                         | —                 | —                 | —                       | —               | —          | —          | —          | —                    | —                  |
| <b>Asia, n.s.</b>            | <b>94,177</b>               | <b>—</b>                | <b>—</b>                  | <b>—</b>          | <b>—</b>          | <b>—</b>                | <b>—</b>        | <b>—</b>   | <b>—</b>   | <b>—</b>   | <b>—</b>             | <b>—</b>           |

Appendix Table A4—Continued

| Country/Region               | FB Living in the U.S., 2018 | Total Sample in Surveys | Sample Composition by Sex |                |                   | Total Number of Surveys | Surveys by Date |            |           |           | Surveys by Location  |                    |
|------------------------------|-----------------------------|-------------------------|---------------------------|----------------|-------------------|-------------------------|-----------------|------------|-----------|-----------|----------------------|--------------------|
|                              |                             |                         | Males                     | Females        | Sex Not Specified |                         | Before 1990     | 1990–1999  | 2000–2009 | 2010–2019 | Studies in Emigrants | Studies in Country |
| <b>Americas</b>              | <b>24,410,150</b>           | <b>2,868,724</b>        | <b>101,004</b>            | <b>334,515</b> | <b>2,433,205</b>  | <b>286</b>              | <b>51</b>       | <b>128</b> | <b>81</b> | <b>26</b> | <b>27</b>            | <b>259</b>         |
| <b>Central America</b>       | <b>15,275,916</b>           | <b>1,070,021</b>        | <b>40,738</b>             | <b>93,234</b>  | <b>936,049</b>    | <b>72</b>               | <b>9</b>        | <b>33</b>  | <b>24</b> | <b>6</b>  | <b>8</b>             | <b>64</b>          |
| Mexico                       | 11,549,703                  | 50,660                  | 7,036                     | 32,490         | 11,134            | 27                      | 3               | 8          | 15        | 1         | 6                    | 21                 |
| El Salvador                  | 1,452,848                   | 332,019                 | 0                         | 126            | 331,893           | 7                       | 1               | 5          | 1         | 0         | 0                    | 7                  |
| Guatemala                    | 1,038,393                   | 46,059                  | 0                         | 42,660         | 3,399             | 9                       | 1               | 5          | 2         | 1         | 2                    | 7                  |
| Honduras                     | 663,876                     | 253,570                 | 32,846                    | 15,721         | 205,003           | 7                       | 0               | 5          | 1         | 1         | 0                    | 7                  |
| Nicaragua                    | 270,471                     | 1,452                   | 0                         | 1,180          | 272               | 2                       | 0               | 2          | 0         | 0         | 0                    | 2                  |
| Panama                       | 153,402                     | 371,322                 | 384                       | 316            | 370,622           | 11                      | 2               | 5          | 1         | 3         | 0                    | 11                 |
| Costa Rica                   | 96,525                      | 538                     | 0                         | 179            | 359               | 2                       | 2               | 0          | 0         | 0         | 0                    | 2                  |
| Belize                       | 50,698                      | 14,401                  | 472                       | 562            | 13,367            | 7                       | 0               | 3          | 4         | 0         | 0                    | 7                  |
| <b>Caribbean</b>             | <b>4,656,720</b>            | <b>128,329</b>          | <b>661</b>                | <b>65,058</b>  | <b>62,610</b>     | <b>40</b>               | <b>14</b>       | <b>12</b>  | <b>10</b> | <b>4</b>  | <b>16</b>            | <b>24</b>          |
| Cuba                         | 1,372,576                   | 22,628                  | 0                         | 550            | 22,078            | 7                       | 1               | 4          | 2         | 0         | 4                    | 3                  |
| Dominican Republic           | 1,234,737                   | 2,392                   | 111                       | 977            | 1,304             | 8                       | 5               | 2          | 1         | 0         | 3                    | 5                  |
| Jamaica                      | 776,242                     | 1,301                   | 242                       | 1,059          | 0                 | 4                       | 0               | 3          | 1         | 0         | 0                    | 4                  |
| Haiti                        | 718,111                     | 63,556                  | 308                       | 62,472         | 776               | 16                      | 7               | 2          | 3         | 4         | 9                    | 7                  |
| Trinidad and Tobago          | 229,145                     | 31,569                  | 0                         | 0              | 31,569            | 2                       | 0               | 0          | 2         | 0         | 0                    | 2                  |
| Barbados                     | 58,522                      | 6,883                   | 0                         | 0              | 6,883             | 3                       | 1               | 1          | 1         | 0         | 0                    | 3                  |
| Caribbean, other/n.s.        | 267,387                     | —                       | —                         | —              | —                 | —                       | —               | —          | —         | —         | —                    | —                  |
| <b>South America</b>         | <b>3,479,059</b>            | <b>1,670,374</b>        | <b>59,605</b>             | <b>176,223</b> | <b>1,434,546</b>  | <b>174</b>              | <b>28</b>       | <b>83</b>  | <b>47</b> | <b>16</b> | <b>3</b>             | <b>171</b>         |
| Colombia                     | 825,787                     | 4,625                   | 18                        | 51             | 4,556             | 4                       | 0               | 1          | 3         | 0         | 1                    | 3                  |
| Ecuador                      | 457,873                     | 494,301                 | 0                         | 0              | 494,301           | 12                      | 8               | 4          | 0         | 0         | 0                    | 12                 |
| Peru                         | 488,139                     | 14,067                  | 2,762                     | 4,753          | 6,552             | 25                      | 6               | 15         | 3         | 1         | 0                    | 25                 |
| Brazil                       | 513,965                     | 237,275                 | 54,489                    | 161,596        | 21,190            | 90                      | 7               | 39         | 34        | 10        | 1                    | 89                 |
| Guyana                       | 287,911                     | 480                     | 0                         | 0              | 480               | 1                       | 0               | 0          | 0         | 1         | 0                    | 1                  |
| Argentina                    | 203,915                     | 11,510                  | 1,177                     | 6,411          | 3,922             | 11                      | 2               | 3          | 2         | 4         | 0                    | 11                 |
| Venezuela                    | 422,418                     | 3,000                   | 205                       | 1,267          | 1,528             | 10                      | 2               | 7          | 1         | 0         | 1                    | 9                  |
| Chile                        | 111,774                     | 1,797                   | 229                       | 1,277          | 291               | 5                       | 2               | 3          | 0         | 0         | 0                    | 5                  |
| Bolivia                      | 85,723                      | 1,930                   | 725                       | 868            | 337               | 4                       | 1               | 1          | 2         | 0         | 0                    | 4                  |
| Uruguay                      | 50,626                      | 671,739                 | 0                         | 0              | 671,739           | 6                       | 0               | 5          | 1         | 0         | 0                    | 6                  |
| Paraguay                     | 20,806                      | 229,650                 | 0                         | 0              | 229,650           | 6                       | 0               | 5          | 1         | 0         | 0                    | 6                  |
| South America, other/n.s.    | 10,122                      | —                       | —                         | —              | —                 | —                       | —               | —          | —         | —         | —                    | —                  |
| <b>Northern America</b>      | <b>980,525</b>              | <b>0</b>                | <b>0</b>                  | <b>0</b>       | <b>0</b>          | <b>0</b>                | <b>0</b>        | <b>0</b>   | <b>0</b>  | <b>0</b>  | <b>0</b>             | <b>0</b>           |
| Canada                       | 963,388                     | —                       | —                         | —              | —                 | —                       | —               | —          | —         | —         | —                    | —                  |
| Northern America, other/n.s. | 17,137                      | —                       | —                         | —              | —                 | —                       | —               | —          | —         | —         | —                    | —                  |
| <b>Americas, n.s.</b>        | <b>17,930</b>               | <b>—</b>                | <b>—</b>                  | <b>—</b>       | <b>—</b>          | <b>—</b>                | <b>—</b>        | <b>—</b>   | <b>—</b>  | <b>—</b>  | <b>—</b>             | <b>—</b>           |
| <b>Oceania</b>               | <b>297,510</b>              | <b>77,311</b>           | <b>4,529</b>              | <b>37,315</b>  | <b>35,467</b>     | <b>62</b>               | <b>28</b>       | <b>15</b>  | <b>18</b> | <b>1</b>  | <b>11</b>            | <b>51</b>          |
| Australia                    | 107,071                     | —                       | —                         | —              | —                 | —                       | —               | —          | —         | —         | —                    | —                  |
| New Zealand                  | 36,252                      | —                       | —                         | —              | —                 | —                       | —               | —          | —         | —         | —                    | —                  |
| Fiji                         | 49,573                      | 27,764                  | 310                       | 24,464         | 2,990             | 16                      | 6               | 5          | 4         | 1         | 2                    | 14                 |
| Tonga                        | 17,636                      | 15,302                  | 207                       | 3,581          | 11,514            | 11                      | 2               | 5          | 4         | 0         | 3                    | 8                  |
| Micronesia                   | 32,438                      | 9,572                   | 3,813                     | 4,742          | 1,017             | 24                      | 13              | 3          | 8         | 0         | 2                    | 22                 |
| Samoa                        | 12,682                      | 24,673                  | 199                       | 4,528          | 19,946            | 11                      | 7               | 2          | 2         | 0         | 4                    | 7                  |
| Oceania, other/n.s.          | 41,858                      | —                       | —                         | —              | —                 | —                       | —               | —          | —         | —         | —                    | —                  |

Appendix Table A4—Continued

| Country/Region              | FB Living in the U.S., 2018 | Total Sample in Surveys | Sample Composition by Sex |                |                   | Total Number of Surveys | Surveys by Date |            |            |            | Surveys by Location  |                    |
|-----------------------------|-----------------------------|-------------------------|---------------------------|----------------|-------------------|-------------------------|-----------------|------------|------------|------------|----------------------|--------------------|
|                             |                             |                         | Males                     | Females        | Sex Not Specified |                         | Before 1990     | 1990–1999  | 2000–2009  | 2010–2019  | Studies in Emigrants | Studies in Country |
| <b>Africa</b>               | <b>2,575,550</b>            | <b>632,984</b>          | <b>251,468</b>            | <b>261,742</b> | <b>119,774</b>    | <b>578</b>              | <b>165</b>      | <b>115</b> | <b>123</b> | <b>175</b> | <b>66</b>            | <b>512</b>         |
| <b>Eastern Africa</b>       | <b>741,178</b>              | <b>121,926</b>          | <b>31,724</b>             | <b>40,665</b>  | <b>49,537</b>     | <b>189</b>              | <b>76</b>       | <b>29</b>  | <b>33</b>  | <b>51</b>  | <b>35</b>            | <b>154</b>         |
| Ethiopia                    | 295,970                     | 41,306                  | 15,546                    | 14,228         | 11,532            | 73                      | 26              | 6          | 7          | 34         | 17                   | 56                 |
| Kenya                       | 163,398                     | 13,836                  | 4,750                     | 8,813          | 273               | 27                      | 19              | 0          | 7          | 1          | 1                    | 26                 |
| Somalia                     | 101,011                     | 11,787                  | 1,270                     | 2,198          | 8,319             | 23                      | 9               | 3          | 6          | 5          | 11                   | 12                 |
| Uganda                      | 35,836                      | 9,979                   | 4,018                     | 5,326          | 635               | 17                      | 4               | 3          | 5          | 5          | 1                    | 16                 |
| Eritrea                     | 45,878                      | 5,165                   | 158                       | 13             | 4,994             | 6                       | 0               | 2          | 0          | 4          | 4                    | 2                  |
| Tanzania                    | 21,483                      | 28,052                  | 773                       | 3,645          | 23,634            | 18                      | 5               | 9          | 2          | 2          | 1                    | 17                 |
| Zimbabwe                    | 29,875                      | 11,801                  | 5,209                     | 6,442          | 150               | 25                      | 13              | 6          | 6          | 0          | 0                    | 25                 |
| Eastern Africa, other/n.s.  | 47,727                      | —                       | —                         | —              | —                 | —                       | —               | —          | —          | —          | —                    | —                  |
| <b>Middle Africa</b>        | <b>162,788</b>              | <b>53,557</b>           | <b>5,854</b>              | <b>31,276</b>  | <b>16,427</b>     | <b>45</b>               | <b>9</b>        | <b>8</b>   | <b>2</b>   | <b>26</b>  | <b>1</b>             | <b>44</b>          |
| Cameroon                    | 81,190                      | 53,557                  | 5,854                     | 31,276         | 16,427            | 45                      | 9               | 8          | 2          | 26         | 1                    | 44                 |
| Middle Africa, other/n.s.   | 81,598                      | —                       | —                         | —              | —                 | —                       | —               | —          | —          | —          | —                    | —                  |
| <b>Northern Africa</b>      | <b>433,036</b>              | <b>196,109</b>          | <b>86,572</b>             | <b>92,983</b>  | <b>16,554</b>     | <b>103</b>              | <b>29</b>       | <b>31</b>  | <b>22</b>  | <b>21</b>  | <b>12</b>            | <b>91</b>          |
| Egypt                       | 224,905                     | 133,050                 | 57,438                    | 63,168         | 12,444            | 63                      | 11              | 27         | 12         | 13         | 5                    | 58                 |
| Morocco                     | 84,690                      | 50,754                  | 26,096                    | 23,291         | 1,367             | 12                      | 3               | 1          | 6          | 2          | 3                    | 9                  |
| Sudan                       | 70,223                      | 11,413                  | 2,987                     | 5,683          | 2,743             | 25                      | 13              | 2          | 4          | 6          | 4                    | 21                 |
| Algeria                     | 23,307                      | 892                     | 51                        | 841            | 0                 | 3                       | 2               | 1          | 0          | 0          | 0                    | 3                  |
| Northern Africa, other/n.s. | 29,911                      | —                       | —                         | —              | —                 | —                       | —               | —          | —          | —          | —                    | —                  |
| <b>Southern Africa</b>      | <b>128,640</b>              | <b>107,393</b>          | <b>70,592</b>             | <b>34,904</b>  | <b>1,897</b>      | <b>39</b>               | <b>19</b>       | <b>11</b>  | <b>4</b>   | <b>5</b>   | <b>0</b>             | <b>39</b>          |
| South Africa                | 108,660                     | 107,393                 | 70,592                    | 34,904         | 1,897             | 39                      | 19              | 11         | 4          | 5          | 0                    | 39                 |
| Southern Africa, other/n.s. | 19,980                      | —                       | —                         | —              | —                 | —                       | —               | —          | —          | —          | —                    | —                  |
| <b>Western Africa</b>       | <b>960,077</b>              | <b>153,999</b>          | <b>56,726</b>             | <b>61,914</b>  | <b>35,359</b>     | <b>202</b>              | <b>32</b>       | <b>36</b>  | <b>62</b>  | <b>72</b>  | <b>18</b>            | <b>184</b>         |
| Nigeria                     | 397,555                     | 66,737                  | 8,134                     | 35,542         | 23,061            | 124                     | 14              | 21         | 40         | 49         | 5                    | 119                |
| Ghana                       | 205,277                     | 14,545                  | 1,167                     | 12,725         | 653               | 27                      | 0               | 3          | 12         | 12         | 4                    | 23                 |
| Liberia                     | 90,793                      | 2,526                   | 243                       | 623            | 1,660             | 7                       | 5               | 1          | 1          | 0          | 2                    | 5                  |
| Cape Verde                  | 38,435                      | 179                     | 89                        | 90             | 0                 | 2                       | 2               | 0          | 0          | 0          | 0                    | 2                  |
| Sierra Leone                | 54,671                      | 19,013                  | 13,822                    | 4,554          | 637               | 12                      | 0               | 2          | 3          | 7          | 3                    | 9                  |
| Senegal                     | 32,863                      | 38,232                  | 23,681                    | 5,968          | 8,583             | 24                      | 10              | 6          | 4          | 4          | 4                    | 20                 |
| Guinea                      | 22,337                      | 12,767                  | 9,590                     | 2,412          | 765               | 6                       | 1               | 3          | 2          | 0          | 0                    | 6                  |
| Western Africa, other/n.s.  | 118,146                     | —                       | —                         | —              | —                 | —                       | —               | —          | —          | —          | —                    | —                  |
| <b>Africa, n.s.</b>         | <b>149,831</b>              | <b>—</b>                | <b>—</b>                  | <b>—</b>       | <b>—</b>          | <b>—</b>                | <b>—</b>        | <b>—</b>   | <b>—</b>   | <b>—</b>   | <b>—</b>             | <b>—</b>           |

Appendix Table A4—Continued

| Country/Region                     | FB Living in the U.S., 2018 | Total Sample in Surveys | Sample Composition by Sex |                |                   | Total Number of Surveys | Surveys by Date |           |           |           | Surveys by Location  |                    |
|------------------------------------|-----------------------------|-------------------------|---------------------------|----------------|-------------------|-------------------------|-----------------|-----------|-----------|-----------|----------------------|--------------------|
|                                    |                             |                         | Males                     | Females        | Sex Not Specified |                         | Before 1990     | 1990–1999 | 2000–2009 | 2010–2019 | Studies in Emigrants | Studies in Country |
| <b>Europe</b>                      | <b>5,894,567</b>            | <b>1,642,136</b>        | <b>50,162</b>             | <b>526,312</b> | <b>1,065,662</b>  | <b>189</b>              | <b>42</b>       | <b>56</b> | <b>65</b> | <b>26</b> | <b>48</b>            | <b>141</b>         |
| <b>Eastern Europe</b>              | <b>2,166,197</b>            | <b>1,642,136</b>        | <b>50,162</b>             | <b>526,312</b> | <b>1,065,662</b>  | <b>189</b>              | <b>42</b>       | <b>56</b> | <b>65</b> | <b>26</b> | <b>48</b>            | <b>141</b>         |
| Poland                             | 415,200                     | 77,172                  | 11,231                    | 25,799         | 40,142            | 20                      | 4               | 3         | 9         | 4         | 2                    | 18                 |
| Russia                             | 396,680                     | 543,123                 | 15,760                    | 276,151        | 251,212           | 26                      | 11              | 6         | 5         | 4         | 4                    | 22                 |
| Ukraine                            | 343,192                     | 40,923                  | 0                         | 23,065         | 17,858            | 6                       | 0               | 1         | 3         | 2         | 3                    | 3                  |
| Romania                            | 170,493                     | 192,460                 | 8,398                     | 18,774         | 165,288           | 35                      | 5               | 15        | 10        | 5         | 4                    | 31                 |
| Yugoslavia                         | 36,223                      | 2,593                   | 0                         | 63             | 2,530             | 5                       | 1               | 3         | 1         | 0         | 4                    | 1                  |
| Bosnia and Herzegovina             | 111,510                     | 9,339                   | 6,963                     | 1,263          | 1,113             | 4                       | 0               | 0         | 3         | 1         | 1                    | 3                  |
| Hungary                            | 72,307                      | 34,526                  | 0                         | 33,434         | 1,092             | 3                       | 2               | 0         | 1         | 0         | 1                    | 2                  |
| Albania                            | 95,436                      | 87,155                  | 2,862                     | 9,467          | 74,826            | 24                      | 0               | 8         | 14        | 2         | 14                   | 10                 |
| Czech Republic & Slovakia          | 65,787                      | 40,494                  | 837                       | 31,889         | 7,768             | 15                      | 5               | 2         | 5         | 3         | 2                    | 13                 |
| Belarus                            | 74,057                      | 31,025                  | 0                         | 0              | 31,025            | 5                       | 2               | 1         | 1         | 1         | 3                    | 2                  |
| Bulgaria                           | 80,429                      | 441,411                 | 645                       | 47,765         | 393,001           | 13                      | 8               | 1         | 2         | 2         | 0                    | 13                 |
| Moldova                            | 47,170                      | 3,967                   | 0                         | 1,098          | 2,869             | 6                       | 1               | 3         | 2         | 0         | 2                    | 4                  |
| Croatia                            | 38,807                      | 58,274                  | 1,130                     | 55,135         | 2,009             | 6                       | 0               | 5         | 0         | 1         | 0                    | 6                  |
| Former USSR                        | 70,258                      | 7,955                   | 506                       | 2,409          | 5,040             | 10                      | 3               | 7         | 0         | 0         | 7                    | 3                  |
| Lithuania                          | 33,237                      | 36,334                  | 1,830                     | 0              | 34,504            | 7                       | 0               | 1         | 6         | 0         | 0                    | 7                  |
| Latvia                             | 24,665                      | 34,950                  | 0                         | 0              | 34,950            | 3                       | 0               | 0         | 3         | 0         | 0                    | 3                  |
| Macedonia                          | 25,940                      | 435                     | 0                         | 0              | 435               | 1                       | 0               | 0         | 0         | 1         | 1                    | 0                  |
| Eastern Europe, other/n.s.         | 64,806                      | —                       | —                         | —              | —                 | —                       | —               | —         | —         | —         | —                    | —                  |
| <b>Southern Europe</b>             | <b>878,517</b>              | <b>0</b>                | <b>0</b>                  | <b>0</b>       | <b>0</b>          | <b>0</b>                | <b>0</b>        | <b>0</b>  | <b>0</b>  | <b>0</b>  | <b>0</b>             | <b>0</b>           |
| Italy                              | 394,857                     | —                       | —                         | —              | —                 | —                       | —               | —         | —         | —         | —                    | —                  |
| Portugal                           | 183,628                     | —                       | —                         | —              | —                 | —                       | —               | —         | —         | —         | —                    | —                  |
| Greece                             | 141,937                     | —                       | —                         | —              | —                 | —                       | —               | —         | —         | —         | —                    | —                  |
| Spain                              | 158,095                     | —                       | —                         | —              | —                 | —                       | —               | —         | —         | —         | —                    | —                  |
| <b>Northern and Western Europe</b> | <b>2,816,583</b>            | <b>0</b>                | <b>0</b>                  | <b>0</b>       | <b>0</b>          | <b>0</b>                | <b>0</b>        | <b>0</b>  | <b>0</b>  | <b>0</b>  | <b>0</b>             | <b>0</b>           |
| United Kingdom                     | 882,828                     | —                       | —                         | —              | —                 | —                       | —               | —         | —         | —         | —                    | —                  |
| Germany                            | 1,149,413                   | —                       | —                         | —              | —                 | —                       | —               | —         | —         | —         | —                    | —                  |
| France                             | 253,868                     | —                       | —                         | —              | —                 | —                       | —               | —         | —         | —         | —                    | —                  |
| Ireland                            | 141,434                     | —                       | —                         | —              | —                 | —                       | —               | —         | —         | —         | —                    | —                  |
| Netherlands                        | 104,658                     | —                       | —                         | —              | —                 | —                       | —               | —         | —         | —         | —                    | —                  |
| No./West Europe, other/n.s.        | 284,382                     | —                       | —                         | —              | —                 | —                       | —               | —         | —         | —         | —                    | —                  |
| <b>Europe, n.s.</b>                | <b>33,270</b>               | <b>—</b>                | <b>—</b>                  | <b>—</b>       | <b>—</b>          | <b>—</b>                | <b>—</b>        | <b>—</b>  | <b>—</b>  | <b>—</b>  | <b>—</b>             | <b>—</b>           |

Abbreviations: FB, foreign-born; n.s., not specified.

For Japan, northern America, Australia, New Zealand, and southern, northern, and western Europe, which have low CHB rates and relatively modest numbers of emigrants to the U.S., rate from reviews were used instead of rates from systematic review and meta-analyses. Male-specific data and female-specific data from the same survey are entered separately and counted as two surveys.

Appendix Table A5. Heterogeneity Tests for Random Effects Meta-Analyses by Country

| Country/Region               | Total Sample       | Total Surveys | Survey Composition |                  |                |                     | Heterogeneity Tests |                     |             |                |
|------------------------------|--------------------|---------------|--------------------|------------------|----------------|---------------------|---------------------|---------------------|-------------|----------------|
|                              |                    |               | Male-Only (MO)     | Female-Only (FO) | Both-Sex (M-F) | Mixed-Gender (n.s.) | df                  | tau <sup>2</sup>    | Cochran's Q | I <sup>2</sup> |
| <b>Asia</b>                  | <b>106,772,038</b> | <b>1,685</b>  | <b>96</b>          | <b>360</b>       | <b>582</b>     | <b>647</b>          |                     |                     |             |                |
| <b>Eastern Asia</b>          | <b>103,366,863</b> | <b>741</b>    | <b>42</b>          | <b>127</b>       | <b>276</b>     | <b>296</b>          |                     |                     |             |                |
| China (including Hong Kong)  | 78,458,637         | 362           | 17                 | 76               | 129            | 140                 | 361                 | 0.000164            | 222,049     | 99.8%          |
| Taiwan                       | 16,276,641         | 236           | 14                 | 36               | 88             | 98                  | 235                 | 0.002017            | 282,688     | 99.9%          |
| Korea                        | 8,631,585          | 143           | 11                 | 15               | 59             | 58                  | 142                 | 0.000693            | 185,435     | 99.9%          |
| Japan                        | —                  | —             | —                  | —                | —              | —                   | NA                  | NA                  | NA          | NA             |
| Eastern Asia, other/n.s.     | —                  | —             | —                  | —                | —              | —                   | NA                  | NA                  | NA          | NA             |
| <b>South Eastern Asia</b>    | <b>1,031,471</b>   | <b>324</b>    | <b>12</b>          | <b>84</b>        | <b>94</b>      | <b>134</b>          |                     |                     |             |                |
| Philippines                  | 120,964            | 25            | 0                  | 10               | 6              | 9                   | 24                  | 0.000376            | 907         | 97.4%          |
| Vietnam                      | 88,456             | 80            | 2                  | 15               | 26             | 37                  | 79                  | 0.000917            | 918         | 91.4%          |
| Thailand                     | 332,550            | 75            | 2                  | 10               | 28             | 35                  | 74                  | 0.000389            | 3,419       | 97.8%          |
| Laos                         | 39,719             | 35            | 0                  | 18               | 4              | 13                  | 34                  | 0.002003            | 961         | 96.5%          |
| Cambodia                     | 16,431             | 23            | 1                  | 7                | 6              | 9                   | 22                  | 0.002004            | 459         | 95.2%          |
| Indonesia                    | 32,532             | 28            | 0                  | 13               | 6              | 9                   | 27                  | 0.000214            | 255         | 89.4%          |
| Myanmar                      | 19,494             | 11            | 0                  | 3                | 0              | 8                   | 10                  | 0.000614            | 149         | 93.3%          |
| Malaysia                     | 273,000            | 20            | 0                  | 5                | 6              | 9                   | 19                  | 0.000129            | 1,707       | 98.9%          |
| Singapore                    | 108,325            | 27            | 7                  | 3                | 12             | 5                   | 26                  | 0.000453            | 1,033       | 97.5%          |
| <b>South Central Asia</b>    | <b>1,173,284</b>   | <b>343</b>    | <b>31</b>          | <b>84</b>        | <b>115</b>     | <b>113</b>          |                     |                     |             |                |
| India                        | 508,284            | 120           | 8                  | 42               | 29             | 41                  | 119                 | 0.000077            | 4,349       | 97.3%          |
| Iran                         | 277,671            | 63            | 5                  | 8                | 32             | 18                  | 62                  | 0.000215            | 4,044       | 98.5%          |
| Pakistan                     | 236,682            | 71            | 6                  | 17               | 28             | 20                  | 70                  | 0.000405            | 4,126       | 98.3%          |
| Bangladesh                   | 72,227             | 31            | 3                  | 8                | 10             | 10                  | 30                  | 0.000478            | 986         | 97.0%          |
| Afghanistan                  | 31,901             | 16            | 0                  | 3                | 4              | 9                   | 15                  | 0.000289            | 298         | 95.0%          |
| Uzbekistan                   | 11,946             | 10            | 0                  | 3                | 0              | 7                   | 9                   | 0.000950            | 185         | 95.1%          |
| Nepal                        | 31,962             | 26            | 9                  | 3                | 8              | 6                   | 25                  | 0.000047            | 170         | 85.3%          |
| Sri Lanka                    | 1,913              | 2             | 0                  | 0                | 2              | 0                   | 1                   | 0.000480            | 21          | 95.2%          |
| Kazakhstan                   | 698                | 4             | 0                  | 0                | 2              | 2                   | 3                   | tau <sup>2</sup> <0 | NA          | NA             |
| So. Central Asia, other/n.s. | —                  | —             | —                  | —                | —              | —                   | NA                  | NA                  | NA          | NA             |
| <b>Western Asia</b>          | <b>1,200,420</b>   | <b>277</b>    | <b>11</b>          | <b>65</b>        | <b>97</b>      | <b>104</b>          |                     |                     |             |                |
| Iraq                         | 93,491             | 11            | 1                  | 0                | 0              | 10                  | 10                  | 0.000077            | 277         | 96.4%          |
| Israel                       | 155,319            | 21            | 0                  | 4                | 10             | 7                   | 20                  | 0.000005            | 130         | 84.6%          |
| Lebanon                      | 62,808             | 11            | 0                  | 4                | 4              | 3                   | 10                  | 0.000043            | 229         | 95.6%          |
| Turkey                       | 539,763            | 115           | 6                  | 31               | 37             | 41                  | 114                 | 0.000364            | 10,042      | 98.9%          |
| Armenia                      | 16,975             | 5             | 0                  | 2                | 0              | 3                   | 4                   | 0.000012            | 30          | 86.9%          |
| Syria                        | 60,048             | 10            | 0                  | 3                | 0              | 7                   | 9                   | 0.000044            | 135         | 93.3%          |
| Jordan                       | 2,307              | 8             | 0                  | 1                | 4              | 3                   | 7                   | 0.001165            | 47          | 85.1%          |
| Saudi Arabia                 | 244,084            | 64            | 3                  | 12               | 36             | 13                  | 63                  | 0.000444            | 3,619       | 98.3%          |
| Yemen                        | 6,028              | 17            | 1                  | 4                | 4              | 8                   | 16                  | 0.002425            | 261         | 93.9%          |
| Kuwait                       | 5,592              | 3             | 0                  | 2                | 0              | 1                   | 2                   | 0.000624            | 120         | 98.3%          |
| Azerbaijan                   | 5,946              | 8             | 0                  | 1                | 2              | 5                   | 7                   | 0.000038            | 13          | 44.4%          |
| Georgia                      | 8,059              | 4             | 0                  | 1                | 0              | 3                   | 3                   | 0.000111            | 8           | 64.3%          |
| Western Asia, other/n.s.     | —                  | —             | —                  | —                | —              | —                   | NA                  | NA                  | NA          | NA             |
| <b>Asia, not specified</b>   | <b>—</b>           | <b>—</b>      | <b>—</b>           | <b>—</b>         | <b>—</b>       | <b>—</b>            | <b>NA</b>           | <b>NA</b>           | <b>NA</b>   | <b>NA</b>      |

Appendix Table A5—Continued

| Country/Region                 | Total Sample     | Total Surveys | Survey Composition |                  |                |                     | Heterogeneity Tests |                     |             |                |
|--------------------------------|------------------|---------------|--------------------|------------------|----------------|---------------------|---------------------|---------------------|-------------|----------------|
|                                |                  |               | Male-Only (MO)     | Female-Only (FO) | Both-Sex (M-F) | Mixed-Gender (n.s.) | df                  | tau <sup>2</sup>    | Cochran's Q | I <sup>2</sup> |
| <b>Americas</b>                | <b>2,868,724</b> | <b>286</b>    | <b>18</b>          | <b>83</b>        | <b>33</b>      | <b>152</b>          |                     |                     |             |                |
| <b>Central America</b>         | <b>1,070,021</b> | <b>72</b>     | <b>1</b>           | <b>18</b>        | <b>4</b>       | <b>49</b>           |                     |                     |             |                |
| Mexico                         | 50,660           | 27            | 1                  | 11               | 2              | 13                  | 26                  | 0.000005            | 216         | 87.9%          |
| El Salvador                    | 332,019          | 7             | 0                  | 1                | 0              | 6                   | 6                   | 0.000002            | 128         | 95.3%          |
| Guatemala                      | 46,059           | 9             | 0                  | 3                | 0              | 6                   | 8                   | 0.000016            | 159         | 95.0%          |
| Honduras                       | 253,570          | 7             | 0                  | 0                | 0              | 7                   | 6                   | 0.000005            | 245         | 97.6%          |
| Nicaragua                      | 1,452            | 2             | 0                  | 1                | 0              | 1                   | 1                   | 0.000044            | 3           | 60.5%          |
| Panama                         | 371,322          | 11            | 0                  | 0                | 2              | 9                   | 10                  | 0.000024            | 1,859       | 99.5%          |
| Costa Rica                     | 538              | 2             | 0                  | 1                | 0              | 1                   | 1                   | tau <sup>2</sup> <0 | NA          | NA             |
| Belize                         | 14,401           | 7             | 0                  | 1                | 0              | 6                   | 6                   | 0.000046            | 63          | 90.5%          |
| <b>Caribbean</b>               | <b>128,329</b>   | <b>40</b>     | <b>2</b>           | <b>18</b>        | <b>0</b>       | <b>20</b>           |                     |                     |             |                |
| Cuba                           | 22,628           | 7             | 0                  | 1                | 0              | 6                   | 6                   | 0.000002            | 7           | 20.0%          |
| Dominican Republic             | 2,392            | 8             | 0                  | 4                | 0              | 4                   | 7                   | 0.000694            | 52          | 86.6%          |
| Jamaica                        | 1,301            | 4             | 0                  | 2                | 0              | 2                   | 3                   | 0.000841            | 71          | 95.8%          |
| Haiti                          | 63,556           | 16            | 2                  | 11               | 0              | 3                   | 15                  | 0.000588            | 562         | 97.3%          |
| Trinidad and Tobago            | 31,569           | 2             | 0                  | 0                | 0              | 2                   | 1                   | 0.000002            | 6           | 82.8%          |
| Barbados                       | 6,883            | 3             | 0                  | 0                | 0              | 3                   | 2                   | 0.000003            | 4           | 55.1%          |
| Caribbean, other/n.s.          | —                | —             | —                  | —                | —              | —                   | NA                  | NA                  | NA          | NA             |
| <b>South America</b>           | <b>1,670,374</b> | <b>174</b>    | <b>15</b>          | <b>47</b>        | <b>29</b>      | <b>83</b>           |                     |                     |             |                |
| Colombia                       | 4,625            | 4             | 0                  | 0                | 0              | 4                   | 3                   | 0                   | 21          | 85.8%          |
| Ecuador                        | 494,301          | 12            | 0                  | 0                | 0              | 12                  | 11                  | 0                   | 51          | 78.6%          |
| Peru                           | 14,067           | 25            | 5                  | 6                | 9              | 5                   | 24                  | 0                   | 184         | 87.0%          |
| Brazil                         | 237,275          | 90            | 10                 | 33               | 12             | 35                  | 89                  | 0                   | 1,527       | 94.2%          |
| Guyana                         | 480              | 1             | 0                  | 0                | 0              | 1                   | NA                  | NA                  | NA          | NA             |
| Argentina                      | 11,510           | 11            | 0                  | 2                | 4              | 5                   | 10                  | 0                   | 33          | 69.7%          |
| Venezuela                      | 3,000            | 10            | 0                  | 4                | 2              | 4                   | 9                   | 0                   | 25          | 63.6%          |
| Chile                          | 1,797            | 5             | 0                  | 2                | 2              | 1                   | 4                   | tau <sup>2</sup> <0 | NA          | NA             |
| Bolivia                        | 1,930            | 4             | 0                  | 0                | 0              | 4                   | 3                   | 0                   | 25          | 88.2%          |
| Uruguay                        | 671,739          | 6             | 0                  | 0                | 0              | 6                   | 5                   | 0                   | 143         | 96.5%          |
| Paraguay                       | 229,650          | 6             | 0                  | 0                | 0              | 6                   | 5                   | 0                   | 339         | 98.5%          |
| South America, other/n.s.      | —                | —             | —                  | —                | —              | —                   | NA                  | NA                  | NA          | NA             |
| <b>Northern America</b>        | <b>0</b>         | <b>0</b>      | <b>0</b>           | <b>0</b>         | <b>0</b>       | <b>0</b>            |                     |                     |             |                |
| Canada                         | —                | —             | —                  | —                | —              | —                   | NA                  | NA                  | NA          | NA             |
| Northern America, other/n.s.   | —                | —             | —                  | —                | —              | —                   | NA                  | NA                  | NA          | NA             |
| <b>Americas, not specified</b> | <b>—</b>         | <b>—</b>      | <b>—</b>           | <b>—</b>         | <b>—</b>       | <b>—</b>            | <b>NA</b>           | <b>NA</b>           | <b>NA</b>   | <b>NA</b>      |
| <b>Oceania</b>                 | <b>77,311</b>    | <b>62</b>     | <b>0</b>           | <b>16</b>        | <b>16</b>      | <b>30</b>           |                     |                     |             |                |
| Australia                      | —                | —             | —                  | —                | —              | —                   | NA                  | NA                  | NA          | NA             |
| New Zealand                    | —                | —             | —                  | —                | —              | —                   | NA                  | NA                  | NA          | NA             |
| Fiji                           | 27,764           | 16            | 0                  | 4                | 2              | 10                  | 15                  | 0.00059             | 529         | 97.2%          |
| Tonga                          | 15,302           | 11            | 0                  | 4                | 2              | 5                   | 10                  | 0.00416             | 564         | 98.2%          |
| Micronesia                     | 9,572            | 24            | 0                  | 5                | 8              | 11                  | 23                  | 0.00679             | 873         | 97.4%          |
| Samoa                          | 24,673           | 11            | 0                  | 3                | 4              | 4                   | 10                  | 0.00022             | 78          | 87.3%          |
| Oceania, other/n.s.            | —                | —             | —                  | —                | —              | —                   | NA                  | NA                  | NA          | NA             |

Appendix Table A5—Continued

| Country/Region               | Total Sample   | Total Surveys | Survey Composition |                  |                |                     | Heterogeneity Tests |                  |             |                |
|------------------------------|----------------|---------------|--------------------|------------------|----------------|---------------------|---------------------|------------------|-------------|----------------|
|                              |                |               | Male-Only (MO)     | Female-Only (FO) | Both-Sex (M-F) | Mixed-Gender (n.s.) | df                  | tau <sup>2</sup> | Cochran's Q | I <sup>2</sup> |
| <b>Africa</b>                | <b>632,984</b> | <b>578</b>    | <b>23</b>          | <b>174</b>       | <b>169</b>     | <b>212</b>          |                     |                  |             |                |
| <b>Eastern Africa</b>        | <b>121,926</b> | <b>189</b>    | <b>5</b>           | <b>50</b>        | <b>70</b>      | <b>64</b>           |                     |                  |             |                |
| Ethiopia                     | 41,306         | 73            | 4                  | 30               | 14             | 25                  | 72                  | 0.00138          | 960         | 92.5%          |
| Kenya                        | 13,836         | 27            | 0                  | 2                | 22             | 3                   | 26                  | 0.00117          | 542         | 95.2%          |
| Somalia                      | 11,787         | 23            | 0                  | 3                | 4              | 16                  | 22                  | 0.00285          | 548         | 96.0%          |
| Uganda                       | 9,979          | 17            | 0                  | 1                | 12             | 4                   | 16                  | 0.00181          | 232         | 93.1%          |
| Eritrea                      | 5,165          | 6             | 0                  | 0                | 0              | 6                   | 5                   | 0.00189          | 59          | 91.5%          |
| Tanzania                     | 28,052         | 18            | 0                  | 7                | 4              | 7                   | 17                  | 0.00022          | 54          | 68.5%          |
| Zimbabwe                     | 11,801         | 25            | 1                  | 7                | 14             | 3                   | 24                  | 0.00486          | 672         | 96.4%          |
| Eastern Africa, other/n.s.   | —              | —             | —                  | —                | —              | —                   | NA                  | NA               | NA          | NA             |
| <b>Middle Africa</b>         | <b>53,557</b>  | <b>45</b>     | <b>1</b>           | <b>22</b>        | <b>8</b>       | <b>14</b>           |                     |                  |             |                |
| Cameroon                     | 53,557         | 45            | 1                  | 22               | 8              | 14                  | 44                  | 0.00340          | 2,244       | 98.0%          |
| Middle Africa, other/n.s.    | —              | —             | —                  | —                | —              | —                   | NA                  | NA               | NA          | NA             |
| <b>Northern Africa</b>       | <b>196,109</b> | <b>103</b>    | <b>11</b>          | <b>19</b>        | <b>29</b>      | <b>44</b>           |                     |                  |             |                |
| Egypt                        | 133,050        | 63            | 6                  | 10               | 16             | 31                  | 62                  | 0.00040          | 2,672       | 97.7%          |
| Morocco                      | 50,754         | 12            | 2                  | 1                | 5              | 4                   | 11                  | 0.00005          | 146         | 92.5%          |
| Sudan                        | 11,413         | 25            | 3                  | 7                | 6              | 9                   | 24                  | 0.00368          | 557         | 95.7%          |
| Algeria                      | 892            | 3             | 0                  | 1                | 2              | 0                   | 2                   | 0.00223          | 11          | 82.6%          |
| Northern Africa, other/n.s.  | —              | —             | —                  | —                | —              | —                   | NA                  | NA               | NA          | NA             |
| <b>Southern Africa</b>       | <b>107,393</b> | <b>39</b>     | <b>2</b>           | <b>15</b>        | <b>10</b>      | <b>12</b>           |                     |                  |             |                |
| South Africa                 | 107,393        | 39            | 2                  | 15               | 10             | 12                  | 38                  | 0.00142          | 3,432       | 98.9%          |
| Southern Africa, other/n.s.  | —              | —             | —                  | —                | —              | —                   | NA                  | NA               | NA          | NA             |
| <b>Western Africa</b>        | <b>153,999</b> | <b>202</b>    | <b>4</b>           | <b>68</b>        | <b>52</b>      | <b>78</b>           |                     |                  |             |                |
| Nigeria                      | 66,737         | 124           | 1                  | 45               | 28             | 50                  | 123                 | 0.00253          | 3,667       | 96.6%          |
| Ghana                        | 14,545         | 27            | 0                  | 17               | 4              | 6                   | 26                  | 0.00219          | 569         | 95.4%          |
| Liberia                      | 2,526          | 7             | 0                  | 1                | 0              | 6                   | 6                   | 0.00394          | 78          | 92.3%          |
| Cape Verde                   | 179            | 2             | 0                  | 0                | 2              | 0                   | 1                   | 0.00098          | 3           | 60.7%          |
| Sierra Leone                 | 19,013         | 12            | 0                  | 3                | 6              | 3                   | 11                  | 0.00063          | 75          | 85.3%          |
| Senegal                      | 38,232         | 24            | 2                  | 2                | 10             | 10                  | 23                  | 0.00218          | 658         | 96.5%          |
| Guinea                       | 12,767         | 6             | 1                  | 0                | 2              | 3                   | 5                   | 0.00034          | 21          | 76.6%          |
| Western Africa, other/n.s.   | —              | —             | —                  | —                | —              | —                   | NA                  | NA               | NA          | NA             |
| <b>Africa, not specified</b> | <b>—</b>       | <b>—</b>      | <b>—</b>           | <b>—</b>         | <b>—</b>       | <b>—</b>            | <b>NA</b>           | <b>NA</b>        | <b>NA</b>   | <b>NA</b>      |

Appendix Table A5—Continued

| Country/Region                     | Total Sample     | Total Surveys | Survey Composition |                  |                |                     | Heterogeneity Tests |                  |             |                |
|------------------------------------|------------------|---------------|--------------------|------------------|----------------|---------------------|---------------------|------------------|-------------|----------------|
|                                    |                  |               | Male-Only (MO)     | Female-Only (FO) | Both-Sex (M-F) | Mixed-Gender (n.s.) | df                  | tau <sup>2</sup> | Cochran's Q | I <sup>2</sup> |
| <b>Europe</b>                      | <b>1,642,136</b> | <b>189</b>    | <b>4</b>           | <b>39</b>        | <b>31</b>      | <b>115</b>          |                     |                  |             |                |
| <b>Eastern Europe</b>              | <b>1,642,136</b> | <b>189</b>    | <b>4</b>           | <b>39</b>        | <b>31</b>      | <b>115</b>          |                     |                  |             |                |
| Poland                             | 77,172           | 20            | 0                  | 3                | 5              | 12                  | 19                  | 0                | 233         | 91.9%          |
| Russia                             | 543,123          | 26            | 2                  | 6                | 4              | 14                  | 25                  | 0                | 1,437       | 98.3%          |
| Ukraine                            | 40,923           | 6             | 0                  | 1                | 0              | 5                   | 5                   | 0                | 223         | 97.8%          |
| Romania                            | 192,460          | 35            | 0                  | 6                | 6              | 23                  | 34                  | 0                | 537         | 93.7%          |
| Yugoslavia                         | 2,593            | 5             | 0                  | 1                | 0              | 4                   | 4                   | 0                | 71          | 94.4%          |
| Bosnia and Herzegovina             | 9,339            | 4             | 0                  | 0                | 2              | 2                   | 3                   | 0                | 20          | 84.8%          |
| Hungary                            | 34,526           | 3             | 0                  | 1                | 0              | 2                   | 2                   | 0                | 10          | 79.3%          |
| Albania                            | 87,155           | 24            | 1                  | 6                | 8              | 9                   | 23                  | 0                | 398         | 94.2%          |
| Czech Republic & Slovakia          | 40,494           | 15            | 0                  | 5                | 2              | 8                   | 14                  | 0                | 296         | 95.3%          |
| Belarus                            | 31,025           | 5             | 0                  | 0                | 0              | 5                   | 4                   | 0                | 59          | 93.2%          |
| Bulgaria                           | 441,411          | 13            | 0                  | 5                | 0              | 8                   | 12                  | 0                | 7,198       | 99.8%          |
| Moldova                            | 3,967            | 6             | 0                  | 1                | 0              | 5                   | 5                   | 0                | 25          | 80.1%          |
| Croatia                            | 58,274           | 6             | 0                  | 3                | 2              | 1                   | 5                   | 0                | 97          | 94.8%          |
| Former USSR                        | 7,955            | 10            | 0                  | 1                | 2              | 7                   | 9                   | 0                | 56          | 83.8%          |
| Lithuania                          | 36,334           | 7             | 1                  | 0                | 0              | 6                   | 6                   | 0                | 102         | 94.1%          |
| Latvia                             | 34,950           | 3             | 0                  | 0                | 0              | 3                   | 2                   | 0                | 11          | 81.0%          |
| Macedonia                          | 435              | 1             | 0                  | 0                | 0              | 1                   | NA                  | NA               | NA          | NA             |
| Eastern Europe, other/n.s.         | —                | —             | —                  | —                | —              | —                   | NA                  | NA               | NA          | NA             |
| <b>Southern Europe</b>             | <b>0</b>         | <b>0</b>      | <b>0</b>           | <b>0</b>         | <b>0</b>       | <b>0</b>            |                     |                  |             |                |
| Italy                              | —                | —             | —                  | —                | —              | —                   | NA                  | NA               | NA          | NA             |
| Portugal                           | —                | —             | —                  | —                | —              | —                   | NA                  | NA               | NA          | NA             |
| Greece                             | —                | —             | —                  | —                | —              | —                   | NA                  | NA               | NA          | NA             |
| Spain                              | —                | —             | —                  | —                | —              | —                   | NA                  | NA               | NA          | NA             |
| <b>Northern and Western Europe</b> | <b>0</b>         | <b>0</b>      | <b>0</b>           | <b>0</b>         | <b>0</b>       | <b>0</b>            |                     |                  |             |                |
| United Kingdom                     | —                | —             | —                  | —                | —              | —                   | NA                  | NA               | NA          | NA             |
| Germany                            | —                | —             | —                  | —                | —              | —                   | NA                  | NA               | NA          | NA             |
| France                             | —                | —             | —                  | —                | —              | —                   | NA                  | NA               | NA          | NA             |
| Ireland                            | —                | —             | —                  | —                | —              | —                   | NA                  | NA               | NA          | NA             |
| Netherlands                        | —                | —             | —                  | —                | —              | —                   | NA                  | NA               | NA          | NA             |
| No./Western Europe, other/n.s.     | —                | —             | —                  | —                | —              | —                   | NA                  | NA               | NA          | NA             |
| <b>Europe, not specified</b>       | <b>—</b>         | <b>—</b>      | <b>—</b>           | <b>—</b>         | <b>—</b>       | <b>—</b>            | <b>NA</b>           | <b>NA</b>        | <b>NA</b>   | <b>NA</b>      |

Abbreviations: df, degrees of freedom; FO, female-only; M-F, male and female; MO, male-only; NA, not applicable; n.s., not specified

For Japan, northern America, Australia, New Zealand, and southern, northern, and western Europe, which have low CHB rates and relatively modest numbers of emigrants to the U.S., rate from reviews were used instead of rates from systematic review and meta-analyses. Male-specific data and female-specific data from the same survey are entered separately and counted as two surveys.

Both-sex surveys report sex-specific data (i.e., sample number and rate) for both males and females. Data for males and for females are entered separately in the meta-analyses, and both are counted in the survey total. Mixed-gender surveys report one combined rate for a sample of males and females; the number of males and females in the sample may or may not be specified.

The random effects meta-analysis model assumes true CHB rates differ in the different populations sampled in each country and estimates the mean of the distribution of the rates in different surveys. Observed rates in surveys in different populations have two sources of variance: within-survey variance due to sampling error, and between-survey variance reflecting the difference in the true CHB rates among the populations surveyed. Tau<sup>2</sup> is an estimate of between-survey variance (i.e., the variance of the true CHB rates across the surveys). Both sources of variance are used for calculating weighting for surveys when they are combined to calculate a pooled CHB rate (10-12).

Heterogeneity refers to variation (difference) in the true CHB rates in the populations sampled in different surveys. Cochran's Q is a statistical measure of heterogeneity that assesses whether differences in observed survey rates reflect a genuine difference in the rates or could have occurred by chance (i.e., Q is a measure of "excess" variation above that expected from sampling error alone). Q is calculated as the weighted sum of squared differences between the individual survey rates and the pooled rate across all surveys; this test lacks statistical power if the meta-analysis includes a small number of surveys.

I<sup>2</sup>, an alternative measure of heterogeneity, represents the proportion of the total variability between studies that can be attributed to heterogeneity; values ≥50% suggest moderate heterogeneity (10-12).



Appendix Table A6. Comparison of CHB Pooled Prevalence Rates in Emigrants and in General Populations for All Countries

| Country/Region              | FB Living in U.S. in 2018 (PUMS) | Prevalence Estimates in Emigrants |                |                      |              |              | Prevalence Estimates in General In-Country Populations |                    |                      |              |              | P-value | Prevalence Comparison |  |
|-----------------------------|----------------------------------|-----------------------------------|----------------|----------------------|--------------|--------------|--------------------------------------------------------|--------------------|----------------------|--------------|--------------|---------|-----------------------|--|
|                             |                                  | Number of Surveys                 | Sample Number  | RE Pooled Prevalence | Lower 95% CI | Upper 95% CI | Number of Surveys                                      | Sample Number      | RE Pooled Prevalence | Lower 95% CI | Upper 95% CI |         |                       |  |
| <b>Asia</b>                 | <b>14,785,266</b>                | <b>305</b>                        | <b>994,475</b> |                      |              |              | <b>1,380</b>                                           | <b>105,777,563</b> |                      |              |              |         |                       |  |
| <b>Eastern Asia</b>         | <b>4,639,824</b>                 | <b>79</b>                         | <b>161,324</b> |                      |              |              | <b>662</b>                                             | <b>103,205,539</b> |                      |              |              |         |                       |  |
| China (including Hong Kong) | 2,527,241                        | 49                                | 125,814        | 11.05%               | 9.52%        | 12.58%       | 313                                                    | 78,332,823         | 8.26%                | 8.09%        | 8.42%        | <0.001  | emigrants higher      |  |
| Taiwan                      | 404,329                          | 5                                 | 2,925          | 9.80%                | 8.19%        | 11.42%       | 231                                                    | 16,273,716         | 12.97%               | 12.36%       | 13.57%       | <0.001  | in-country higher     |  |
| Korea                       | 1,133,728                        | 25                                | 32,585         | 3.64%                | 2.99%        | 4.30%        | 118                                                    | 8,599,000          | 4.78%                | 4.30%        | 5.27%        | 0.006   | in-country higher     |  |
| Japan                       | 560,538                          | —                                 | —              | NA                   | NA           | NA           | —                                                      | —                  | NA                   | NA           | NA           | NA      | NA                    |  |
| Eastern Asia, other/n.s.    | 13,988                           | —                                 | —              | NA                   | NA           | NA           | —                                                      | —                  | NA                   | NA           | NA           | NA      | NA                    |  |
| <b>South Eastern Asia</b>   | <b>4,529,616</b>                 | <b>136</b>                        | <b>474,301</b> |                      |              |              | <b>188</b>                                             | <b>557,170</b>     |                      |              |              |         |                       |  |
| Philippines                 | 2,168,566                        | 12                                | 106,619        | 3.65%                | 2.94%        | 4.35%        | 13                                                     | 14,345             | 10.45%               | 8.38%        | 12.53%       | <0.001  | in-country higher     |  |
| Vietnam                     | 1,365,908                        | 51                                | 71,498         | 11.20%               | 10.21%       | 12.19%       | 29                                                     | 16,958             | 12.66%               | 11.31%       | 14.02%       | 0.088   | n.s.                  |  |
| Thailand                    | 289,335                          | 16                                | 231,238        | 5.36%                | 4.68%        | 6.04%        | 59                                                     | 101,312            | 6.56%                | 5.69%        | 7.43%        | 0.033   | in-country higher     |  |
| Laos                        | 189,131                          | 22                                | 19,512         | 12.19%               | 10.05%       | 14.33%       | 13                                                     | 20,207             | 5.13%                | 4.25%        | 6.01%        | <0.001  | emigrants higher      |  |
| Cambodia                    | 144,093                          | 14                                | 11,605         | 11.34%               | 9.00%        | 13.69%       | 9                                                      | 4,826              | 5.20%                | 3.79%        | 6.62%        | <0.001  | emigrants higher      |  |
| Indonesia                   | 101,501                          | 5                                 | 12,136         | 2.46%                | 1.66%        | 3.25%        | 23                                                     | 20,396             | 4.61%                | 3.62%        | 5.60%        | <0.001  | in-country higher     |  |
| Myanmar                     | 145,864                          | 10                                | 13,947         | 8.89%                | 6.82%        | 10.95%       | 1                                                      | 5,547              | 6.50%                | 5.85%        | 7.15%        | 0.031   | emigrants higher      |  |
| Malaysia                    | 84,316                           | 6                                 | 7,746          | 2.47%                | 1.63%        | 3.30%        | 14                                                     | 265,254            | 3.25%                | 2.53%        | 3.97%        | 0.163   | n.s.                  |  |
| Singapore                   | 40,902                           | 0                                 | 0              | —                    | —            | —            | 27                                                     | 108,325            | 5.61%                | 4.74%        | 6.48%        | —       | —                     |  |
| <b>South Central Asia</b>   | <b>4,264,431</b>                 | <b>53</b>                         | <b>233,341</b> |                      |              |              | <b>290</b>                                             | <b>939,943</b>     | <b>33.52%</b>        |              |              |         |                       |  |
| India                       | 2,670,106                        | 10                                | 85,163         | 0.79%                | 0.44%        | 1.14%        | 110                                                    | 423,121            | 2.68%                | 2.44%        | 2.91%        | <0.001  | in-country higher     |  |
| Iran                        | 397,203                          | 3                                 | 4,075          | 1.16%                | 0.61%        | 1.70%        | 60                                                     | 273,596            | 2.39%                | 2.00%        | 2.79%        | <0.001  | in-country higher     |  |
| Pakistan                    | 400,978                          | 12                                | 60,382         | 1.65%                | 0.86%        | 2.45%        | 59                                                     | 176,300            | 4.29%                | 3.66%        | 4.92%        | <0.001  | in-country higher     |  |
| Bangladesh                  | 281,578                          | 6                                 | 51,581         | 2.81%                | 0.86%        | 4.77%        | 25                                                     | 20,646             | 5.00%                | 3.99%        | 6.01%        | 0.051   | n.s.                  |  |
| Afghanistan                 | 119,003                          | 13                                | 26,957         | 4.19%                | 2.97%        | 5.41%        | 3                                                      | 4,944              | 4.50%                | 0.68%        | 8.32%        | 0.880   | n.s.                  |  |
| Uzbekistan                  | 74,008                           | 2                                 | 224            | 9.08%                | -3.04%       | 21.21%       | 8                                                      | 11,722             | 6.11%                | 3.83%        | 8.39%        | 0.640   | n.s.                  |  |
| Nepal                       | 151,248                          | 7                                 | 4,959          | 2.69%                | 1.47%        | 3.90%        | 19                                                     | 27,003             | 1.19%                | 0.77%        | 1.61%        | 0.023   | emigrants higher      |  |
| Sri Lanka                   | 52,894                           | 0                                 | 0              | —                    | —            | —            | 2                                                      | 1,913              | 2.41%                | -0.72%       | 5.53%        | —       | —                     |  |
| Kazakhstan                  | 30,431                           | 0                                 | 0              | —                    | —            | —            | 4                                                      | 698                | 4.95%                | 3.34%        | 6.56%        | —       | —                     |  |
| So Cen Asia, other/n.s.     | 86,982                           | —                                 | —              | NA                   | NA           | NA           | —                                                      | —                  | NA                   | NA           | NA           | NA      | NA                    |  |
| <b>Western Asia</b>         | <b>1,257,218</b>                 | <b>37</b>                         | <b>125,509</b> |                      |              |              | <b>240</b>                                             | <b>1,074,911</b>   |                      |              |              |         |                       |  |
| Iraq                        | 250,435                          | 8                                 | 15,766         | 0.80%                | 0.61%        | 0.99%        | 3                                                      | 77,725             | 2.18%                | 1.80%        | 2.56%        | <0.001  | in-country higher     |  |
| Israel                      | 163,156                          | 0                                 | 0              | NA                   | NA           | NA           | 21                                                     | 155,319            | 0.77%                | 0.64%        | 0.90%        | NA      | NA                    |  |
| Lebanon                     | 135,345                          | 4                                 | 22,932         | 0.92%                | 0.59%        | 1.25%        | 7                                                      | 39,876             | 1.60%                | 0.98%        | 2.23%        | 0.058   | n.s.                  |  |
| Turkey                      | 150,341                          | 14                                | 34,575         | 4.49%                | 3.44%        | 5.54%        | 101                                                    | 505,188            | 4.47%                | 4.06%        | 4.89%        | 0.980   | n.s.                  |  |
| Armenia                     | 92,327                           | 2                                 | 390            | 2.54%                | 0.88%        | 4.19%        | 3                                                      | 16,585             | 0.55%                | 0.17%        | 0.93%        | 0.022   | emigrants higher      |  |
| Syria                       | 113,654                          | 7                                 | 51,045         | 1.34%                | 1.03%        | 1.66%        | 3                                                      | 9,003              | 2.86%                | 0.79%        | 4.93%        | 0.157   | n.s.                  |  |
| Jordan                      | 87,888                           | 0                                 | 0              | —                    | —            | —            | 8                                                      | 2,307              | 6.36%                | 3.72%        | 9.00%        | —       | —                     |  |
| Saudi Arabia                | 91,085                           | 0                                 | 0              | —                    | —            | —            | 64                                                     | 244,084            | 5.51%                | 4.93%        | 6.09%        | —       | —                     |  |
| Yemen                       | 64,556                           | 0                                 | 0              | —                    | —            | —            | 17                                                     | 6,028              | 10.44%               | 7.88%        | 13.00%       | —       | —                     |  |
| Kuwait                      | 39,318                           | 0                                 | 0              | —                    | —            | —            | 3                                                      | 5,592              | 2.66%                | -0.19%       | 5.52%        | —       | —                     |  |
| Azerbaijan                  | 23,015                           | 1                                 | 442            | 5.66%                | 3.50%        | 7.81%        | 7                                                      | 5,504              | 3.22%                | 2.65%        | 3.79%        | 0.032   | emigrants higher      |  |
| Georgia                     | 20,125                           | 1                                 | 359            | 5.01%                | 2.76%        | 7.27%        | 3                                                      | 7,700              | 3.41%                | 2.01%        | 4.80%        | 0.235   | n.s.                  |  |
| So Cen Asia, other/n.s.     | 25,973                           | —                                 | —              | NA                   | NA           | NA           | —                                                      | —                  | NA                   | NA           | NA           | NA      | NA                    |  |

Appendix Table A6—Continued

| Country/Region                 | FB Living in U.S. in 2018 (PUMS) | Prevalence Estimates in Emigrants |               |                      |              |              | Prevalence Estimates in General In-Country Populations |                  |                      |              |              | P-value   | Prevalence Comparison |
|--------------------------------|----------------------------------|-----------------------------------|---------------|----------------------|--------------|--------------|--------------------------------------------------------|------------------|----------------------|--------------|--------------|-----------|-----------------------|
|                                |                                  | Number of Surveys                 | Sample Number | RE Pooled Prevalence | Lower 95% CI | Upper 95% CI | Number of Surveys                                      | Sample Number    | RE Pooled Prevalence | Lower 95% CI | Upper 95% CI |           |                       |
| Asia, not specified            | 94,177                           | —                                 | —             | NA                   | NA           | NA           | —                                                      | —                | NA                   | NA           | NA           | NA        | NA                    |
| <b>Americas</b>                | <b>24,410,150</b>                | <b>27</b>                         | <b>37,033</b> |                      |              |              | <b>259</b>                                             | <b>2,831,691</b> |                      |              |              |           |                       |
| <b>Central America</b>         | <b>15,275,916</b>                | <b>8</b>                          | <b>11,297</b> |                      |              |              | <b>64</b>                                              | <b>1,058,724</b> |                      |              |              |           |                       |
| Mexico                         | 11,549,703                       | 6                                 | 10,480        | 0.08%                | 0.02%        | 0.14%        | 21                                                     | 40,180           | 0.56%                | 0.39%        | 0.73%        | <0.001    | in-country higher     |
| El Salvador                    | 1,452,848                        | 0                                 | 0             | —                    | —            | —            | 7                                                      | 332,019          | 0.44%                | 0.33%        | 0.55%        | —         | —                     |
| Guatemala                      | 1,038,393                        | 2                                 | 817           | 9.52%                | -5.63%       | 24.67%       | 7                                                      | 45,242           | 0.44%                | 0.22%        | 0.65%        | 0.240     | n.s.                  |
| Honduras                       | 663,876                          | 0                                 | 0             | —                    | —            | —            | 7                                                      | 253,570          | 0.51%                | 0.35%        | 0.68%        | —         | —                     |
| Nicaragua                      | 270,471                          | 0                                 | 0             | —                    | —            | —            | 2                                                      | 1,452            | 0.68%                | -0.41%       | 1.78%        | —         | —                     |
| Panama                         | 153,402                          | 0                                 | 0             | —                    | —            | —            | 11                                                     | 371,322          | 0.83%                | 0.52%        | 1.13%        | —         | —                     |
| Costa Rica                     | 96,525                           | 0                                 | 0             | —                    | —            | —            | 2                                                      | 538              | 0.57%                | -0.07%       | 1.20%        | —         | —                     |
| Belize                         | 50,698                           | 0                                 | 0             | —                    | —            | —            | 7                                                      | 14,401           | 1.28%                | 0.72%        | 1.83%        | —         | —                     |
| <b>Caribbean</b>               | <b>4,656,720</b>                 | <b>16</b>                         | <b>25,169</b> |                      |              |              | <b>24</b>                                              | <b>103,160</b>   |                      |              |              |           |                       |
| Cuba                           | 1,372,576                        | 4                                 | 20,672        | 0.80%                | 0.50%        | 1.11%        | 3                                                      | 1,956            | 1.09%†               | 0.63%        | 1.55%        | 0.311     | n.s.                  |
| Dominican Republic             | 1,234,737                        | 3                                 | 1,337         | 3.13%                | -0.04%       | 6.31%        | 5                                                      | 1,055            | 6.85%                | 2.60%        | 11.10%       | 0.170     | n.s.                  |
| Jamaica                        | 776,242                          | 0                                 | 0             | —                    | —            | —            | 4                                                      | 1,301            | 3.94%                | 0.81%        | 7.07%        | —         | —                     |
| Haiti                          | 718,111                          | 9                                 | 3,160         | 4.72%                | 3.21%        | 6.23%        | 7                                                      | 60,396           | 4.10%                | 2.12%        | 6.07%        | 0.622     | n.s.                  |
| Trinidad and Tobago            | 229,145                          | 0                                 | 0             | —                    | —            | —            | 2                                                      | 31,569           | 0.71%                | 0.49%        | 0.94%        | —         | —                     |
| Barbados                       | 58,522                           | 0                                 | 0             | —                    | —            | —            | 3                                                      | 6,883            | 0.41%                | 0.15%        | 0.67%        | —         | —                     |
| Caribbean, other/n.s.          | 267,387                          | —                                 | —             | NA                   | NA           | NA           | —                                                      | —                | NA                   | NA           | NA           | NA        | NA                    |
| <b>South America</b>           | <b>3,479,059</b>                 | <b>3</b>                          | <b>567</b>    |                      |              |              | <b>171</b>                                             | <b>1,669,807</b> |                      |              |              |           |                       |
| Colombia                       | 825,787                          | 1                                 | 334           | 0.90%                | -0.11%       | 1.91%        | 3                                                      | 4,291            | 0.85%                | -0.21%       | 1.90%        | 0.945     | n.s.                  |
| Ecuador                        | 457,873                          | 0                                 | 0             | —                    | —            | —            | 12                                                     | 494,301          | 0.47%                | 0.42%        | 0.51%        | —         | —                     |
| Peru                           | 488,139                          | 0                                 | 0             | —                    | —            | —            | 25                                                     | 14,067           | 1.82%                | 1.28%        | 2.36%        | —         | —                     |
| Brazil                         | 513,965                          | 1                                 | 91            | 3.30%                | -0.37%       | 6.97%        | 89                                                     | 237,184          | 1.37%                | 1.23%        | 1.51%        | 0.304     | n.s.                  |
| Guyana                         | 287,911                          | 0                                 | 0             | —                    | —            | —            | 1                                                      | 480              | 3.96%                | 2.21%        | 5.70%        | —         | —                     |
| Argentina                      | 203,915                          | 0                                 | 0             | —                    | —            | —            | 11                                                     | 11,510           | 0.41%                | 0.20%        | 0.62%        | —         | —                     |
| Venezuela                      | 422,418                          | 1                                 | 142           | 0.70%                | -0.67%       | 2.07%        | 9                                                      | 2,858            | 2.12%                | 1.24%        | 3.01%        | 0.088     | n.s.                  |
| Chile                          | 111,774                          | 0                                 | 0             | —                    | —            | —            | 5                                                      | 1,797            | 0.40%                | 0.11%        | 0.69%        | —         | —                     |
| Bolivia                        | 85,723                           | 0                                 | 0             | —                    | —            | —            | 4                                                      | 1,930            | 3.03%                | 0.08%        | 5.98%        | —         | —                     |
| Uruguay                        | 50,626                           | 0                                 | 0             | —                    | —            | —            | 6                                                      | 671,739          | 0.38%                | 0.30%        | 0.46%        | —         | —                     |
| Paraguay                       | 20,806                           | 0                                 | 0             | —                    | —            | —            | 6                                                      | 229,650          | 0.78%                | 0.52%        | 1.05%        | —         | —                     |
| South America, other/n.s.      | 10,122                           | —                                 | —             | NA                   | NA           | NA           | —                                                      | —                | NA                   | NA           | NA           | NA        | NA                    |
| <b>Northern America</b>        | <b>980,525</b>                   | <b>0</b>                          | <b>0</b>      |                      |              |              | <b>0</b>                                               | <b>0</b>         |                      |              |              |           |                       |
| Canada                         | 963,388                          | —                                 | —             | NA                   | NA           | NA           | —                                                      | —                | NA                   | NA           | NA           | NA        | NA                    |
| Northern America, other        | 17,137                           | —                                 | —             | NA                   | NA           | NA           | —                                                      | —                | NA                   | NA           | NA           | NA        | NA                    |
| <b>Americas, not specified</b> | <b>17,930</b>                    | <b>—</b>                          | <b>—</b>      | <b>NA</b>            | <b>NA</b>    | <b>NA</b>    | <b>—</b>                                               | <b>—</b>         | <b>NA</b>            | <b>NA</b>    | <b>NA</b>    | <b>NA</b> | <b>NA</b>             |

Appendix Table A6—Continued

| Country/Region               | FB Living in U.S. in 2018 (PUMS) | Prevalence Estimates in Emigrants |               |                      |              |              | Prevalence Estimates in General In-Country Populations |                |                      |              |              | P-value   | Prevalence Comparison |
|------------------------------|----------------------------------|-----------------------------------|---------------|----------------------|--------------|--------------|--------------------------------------------------------|----------------|----------------------|--------------|--------------|-----------|-----------------------|
|                              |                                  | Number of Surveys                 | Sample Number | RE Pooled Prevalence | Lower 95% CI | Upper 95% CI | Number of Surveys                                      | Sample Number  | RE Pooled Prevalence | Lower 95% CI | Upper 95% CI |           |                       |
| <b>Oceania</b>               | <b>297,510</b>                   | <b>11</b>                         | <b>45,470</b> |                      |              |              | <b>51</b>                                              | <b>31,841</b>  |                      |              |              |           |                       |
| Australia                    | 107,071                          | —                                 | —             | NA                   | NA           | NA           | —                                                      | —              | NA                   | NA           | NA           | NA        | NA                    |
| New Zealand                  | 36,252                           | —                                 | —             | NA                   | NA           | NA           | —                                                      | —              | NA                   | NA           | NA           | NA        | NA                    |
| Fiji                         | 49,573                           | 2                                 | 7,942         | 2.01%                | -0.62%       | 4.63%        | 14                                                     | 19,822         | 5.10%                | 3.64%        | 6.56%        | 0.044     | in-country higher     |
| Tonga                        | 17,636                           | 3                                 | 13,289        | 9.99%                | 6.38%        | 13.60%       | 8                                                      | 2,013          | 13.03%               | 6.73%        | 19.32%       | 0.412     | n.s.                  |
| Micronesia                   | 32,438                           | 2                                 | 880           | 6.88%†               | 5.21%        | 8.55%        | 22                                                     | 8,692          | 15.11%               | 11.22%       | 19.01%       | <0.001    | in-country higher     |
| Samoa                        | 12,682                           | 4                                 | 23,359        | 3.98%                | 2.62%        | 5.33%        | 7                                                      | 1,314          | 3.45%                | 1.69%        | 5.21%        | 0.642     | n.s.                  |
| Oceania, other/n.s.          | 41,858                           | —                                 | —             | NA                   | NA           | NA           | —                                                      | —              | NA                   | NA           | NA           | NA        | NA                    |
| <b>Africa</b>                | <b>2,575,550</b>                 | <b>66</b>                         | <b>54,837</b> |                      |              |              | <b>512</b>                                             | <b>578,147</b> |                      |              |              |           |                       |
| <b>Eastern Africa</b>        | <b>741,178</b>                   | <b>35</b>                         | <b>25,637</b> |                      |              |              | <b>154</b>                                             | <b>96,289</b>  |                      |              |              |           |                       |
| Ethiopia                     | 295,970                          | 17                                | 10,899        | 11.37%               | 9.40%        | 13.33%       | 56                                                     | 30,407         | 6.29%                | 5.33%        | 7.24%        | <0.001    | emigrants higher      |
| Kenya                        | 163,398                          | 1                                 | 121           | 4.10%                | 0.57%        | 7.63%        | 26                                                     | 13,715         | 6.06%                | 4.63%        | 7.48%        | 0.314     | n.s.                  |
| Somalia                      | 101,011                          | 11                                | 9,263         | 7.54%                | 4.77%        | 10.32%       | 12                                                     | 2,524          | 14.45%               | 9.10%        | 19.80%       | 0.025     | in-country higher     |
| Uganda                       | 35,836                           | 1                                 | 136           | 2.94%                | 0.10%        | 5.78%        | 16                                                     | 9,843          | 9.67%                | 7.41%        | 11.92%       | <0.001    | in-country higher     |
| Eritrea                      | 45,878                           | 4                                 | 4,994         | 6.17%                | 1.96%        | 10.39%       | 2                                                      | 171            | 15.52%               | 2.02%        | 29.02%       | 0.195     | n.s.                  |
| Tanzania                     | 21,483                           | 1                                 | 224           | 3.10%                | 0.83%        | 5.37%        | 17                                                     | 27,828         | 5.97%                | 5.02%        | 6.91%        | 0.022     | in-country higher     |
| Zimbabwe                     | 29,875                           | 0                                 | 0             | —                    | —            | —            | 25                                                     | 11,801         | 12.53%               | 9.62%        | 15.44%       | —         | —                     |
| Eastern Africa, other/n.s.   | 47,727                           | —                                 | —             | NA                   | NA           | NA           | —                                                      | —              | NA                   | NA           | NA           | NA        | NA                    |
| <b>Middle Africa</b>         | <b>162,788</b>                   | <b>1</b>                          | <b>68</b>     |                      |              |              | <b>44</b>                                              | <b>53,489</b>  |                      |              |              |           |                       |
| Cameroon                     | 81,190                           | 1                                 | 68            | 4.41%                | -0.47%       | 9.29%        | 44                                                     | 53,489         | 9.46%                | 7.66%        | 11.27%       | 0.057     | n.s.                  |
| Middle Africa, other/n.s.    | 81,598                           | —                                 | —             | NA                   | NA           | NA           | —                                                      | —              | NA                   | NA           | NA           | NA        | NA                    |
| <b>Northern Africa</b>       | <b>433,036</b>                   | <b>12</b>                         | <b>19,436</b> |                      |              |              | <b>91</b>                                              | <b>176,673</b> |                      |              |              |           |                       |
| Egypt                        | 224,905                          | 5                                 | 6,329         | 2.93%                | 1.44%        | 4.42%        | 58                                                     | 126,721        | 4.27%                | 3.66%        | 4.87%        | 0.103     | n.s.                  |
| Morocco                      | 84,690                           | 3                                 | 7,992         | 1.52%†               | 1.25%        | 1.79%        | 9                                                      | 42,762         | 2.13%                | 1.51%        | 2.75%        | 0.075     | n.s.                  |
| Sudan                        | 70,223                           | 4                                 | 5,115         | 6.07%                | 4.21%        | 7.94%        | 21                                                     | 6,298          | 16.24%               | 12.51%       | 19.97%       | <0.001    | in-country higher     |
| Algeria                      | 23,307                           | 0                                 | 0             | —                    | —            | —            | 3                                                      | 892            | 6.09%                | 0.00%        | 12.19%       | —         | —                     |
| Northern Africa, other/n.s.  | 29,911                           | —                                 | —             | NA                   | NA           | NA           | —                                                      | —              | NA                   | NA           | NA           | NA        | NA                    |
| <b>Southern Africa</b>       | <b>128,640</b>                   | <b>0</b>                          | <b>0</b>      |                      |              |              | <b>39</b>                                              | <b>107,393</b> |                      |              |              |           |                       |
| South Africa                 | 108,660                          | 0                                 | 0             | —                    | —            | —            | 39                                                     | 107,393        | 5.68%                | 4.42%        | 6.93%        | —         | —                     |
| Southern Africa, other/n.s.  | 19,980                           | —                                 | —             | NA                   | NA           | NA           | —                                                      | —              | NA                   | NA           | NA           | NA        | NA                    |
| <b>Western Africa</b>        | <b>960,077</b>                   | <b>18</b>                         | <b>9,696</b>  |                      |              |              | <b>184</b>                                             | <b>144,303</b> |                      |              |              |           |                       |
| Nigeria                      | 397,555                          | 5                                 | 4,134         | 4.29%                | 2.07%        | 6.50%        | 119                                                    | 62,603         | 10.52%               | 9.49%        | 11.55%       | <0.001    | in-country higher     |
| Ghana                        | 205,277                          | 4                                 | 1,141         | 6.34%                | 1.41%        | 11.27%       | 23                                                     | 13,404         | 10.36%               | 8.47%        | 12.25%       | 0.136     | n.s.                  |
| Liberia                      | 90,793                           | 2                                 | 785           | 13.39%               | 10.68%       | 16.11%       | 5                                                      | 1,741          | 18.14%               | 10.62%       | 25.65%       | 0.245     | n.s.                  |
| Cape Verde                   | 38,435                           | 0                                 | 0             | —                    | —            | —            | 2                                                      | 179            | 5.65%                | 0.16%        | 11.14%       | —         | —                     |
| Sierra Leone                 | 54,671                           | 3                                 | 1,044         | 14.36%               | 9.16%        | 19.57%       | 9                                                      | 17,969         | 11.73%               | 9.69%        | 13.76%       | 0.355     | n.s.                  |
| Senegal                      | 32,863                           | 4                                 | 2,592         | 13.66%               | 7.49%        | 19.83%       | 20                                                     | 35,640         | 12.20%               | 10.05%       | 14.35%       | 0.661     | n.s.                  |
| Guinea                       | 22,337                           | 0                                 | 0             | —                    | —            | —            | 6                                                      | 12,767         | 14.90%               | 13.03%       | 16.77%       | —         | —                     |
| Western Africa, other/n.s.   | 118,146                          | —                                 | —             | NA                   | NA           | NA           | —                                                      | —              | NA                   | NA           | NA           | NA        | NA                    |
| <b>Africa, not specified</b> | <b>149,831</b>                   | <b>—</b>                          | <b>—</b>      | <b>NA</b>            | <b>NA</b>    | <b>NA</b>    | <b>—</b>                                               | <b>—</b>       | <b>NA</b>            | <b>NA</b>    | <b>NA</b>    | <b>NA</b> | <b>NA</b>             |

Appendix Table A6—Continued

| Country/Region                 | FB Living in U.S. in 2018 (PUMS) | Prevalence Estimates in Emigrants |               |                      |              |              | Prevalence Estimates in General In-Country Populations |                  |                      |              |              | P-value   | Prevalence Comparison |
|--------------------------------|----------------------------------|-----------------------------------|---------------|----------------------|--------------|--------------|--------------------------------------------------------|------------------|----------------------|--------------|--------------|-----------|-----------------------|
|                                |                                  | Number of Surveys                 | Sample Number | RE Pooled Prevalence | Lower 95% CI | Upper 95% CI | Number of Surveys                                      | Sample Number    | RE Pooled Prevalence | Lower 95% CI | Upper 95% CI |           |                       |
| <b>Europe</b>                  | <b>5,894,567</b>                 | <b>48</b>                         | <b>29,768</b> |                      |              |              | <b>141</b>                                             | <b>1,612,368</b> |                      |              |              |           |                       |
| <b>Eastern Europe</b>          | <b>2,166,197</b>                 | <b>48</b>                         | <b>29,768</b> |                      |              |              | <b>141</b>                                             | <b>1,612,368</b> |                      |              |              |           |                       |
| Poland                         | 415,200                          | 2                                 | 1,822         | 1.18%                | 0.14%        | 2.22%        | 18                                                     | 75,350           | 1.35%                | 0.97%        | 1.73%        | 0.763     | n.s.                  |
| Russia                         | 396,680                          | 4                                 | 906           | 1.93%                | 0.74%        | 3.11%        | 22                                                     | 542,217          | 2.83%                | 2.35%        | 3.31%        | 0.166     | n.s.                  |
| Ukraine                        | 343,192                          | 3                                 | 3,005         | 1.69%                | 1.01%        | 2.37%        | 3                                                      | 37,918           | 1.74%                | 0.01%        | 3.47%        | 0.957     | n.s.                  |
| Romania                        | 170,493                          | 4                                 | 1,060         | 5.68%                | 2.07%        | 9.28%        | 31                                                     | 191,400          | 6.52%                | 6.01%        | 7.04%        | 0.649     | n.s.                  |
| Yugoslavia                     | 36,223                           | 4                                 | 2,530         | 3.87%                | 1.01%        | 6.74%        | 1                                                      | 63               | 4.76%                | -0.50%       | 10.02%       | 0.772     | n.s.                  |
| Bosnia and Herzegovina         | 111,510                          | 1                                 | 397           | 2.27%                | 0.80%        | 3.73%        | 3                                                      | 8,942            | 1.36%                | 0.53%        | 2.19%        | 0.292     | n.s.                  |
| Hungary                        | 72,307                           | 1                                 | 94            | 1.10%                | -1.01%       | 3.21%        | 2                                                      | 34,432           | 1.08%                | -0.18%       | 2.35%        | 0.990     | n.s.                  |
| Albania                        | 95,436                           | 14                                | 14,132        | 12.17%               | 9.57%        | 14.76%       | 10                                                     | 73,023           | 9.31%                | 8.54%        | 10.08%       | 0.039     | emigrants higher      |
| Czech Republic & Slovakia      | 65,787                           | 2                                 | 604           | 5.23%                | -2.81%       | 13.26%       | 13                                                     | 39,890           | 1.23%                | 0.77%        | 1.68%        | 0.330     | n.s.                  |
| Belarus                        | 74,057                           | 3                                 | 355           | 2.16%                | 0.65%        | 3.68%        | 2                                                      | 30,670           | 3.41%                | 1.69%        | 5.14%        | 0.286     | n.s.                  |
| Bulgaria                       | 80,429                           | 0                                 | 0             | —                    | —            | —            | 13                                                     | 441,411          | 4.14%                | 2.81%        | 5.47%        | —         | —                     |
| Moldova                        | 47,170                           | 2                                 | 956           | 8.62%                | 3.93%        | 13.30%       | 4                                                      | 3,011            | 10.37%               | 7.39%        | 13.36%       | 0.535     | n.s.                  |
| Croatia                        | 38,807                           | 0                                 | 0             | —                    | —            | —            | 6                                                      | 58,274           | 1.34%                | 0.76%        | 1.92%        | —         | —                     |
| Former USSR                    | 70,258                           | 7                                 | 3,472         | 3.44%                | 2.01%        | 4.88%        | 3                                                      | 4,483            | 4.66%                | 3.69%        | 5.63%        | 0.167     | n.s.                  |
| Lithuania                      | 33,237                           | 0                                 | 0             | —                    | —            | —            | 7                                                      | 36,334           | 2.03%                | 1.37%        | 2.69%        | —         | —                     |
| Latvia                         | 24,665                           | 0                                 | 0             | —                    | —            | —            | 3                                                      | 34,950           | 1.39%                | 1.10%        | 1.67%        | —         | —                     |
| Macedonia                      | 25,940                           | 1                                 | 435           | 5.75%                | 3.56%        | 7.93%        | 0                                                      | 0                | —                    | —            | —            | —         | —                     |
| Eastern Europe, other/n.s.     | 64,806                           | —                                 | —             | NA                   | NA           | NA           | —                                                      | —                | NA                   | NA           | NA           | NA        | NA                    |
| <b>Southern Europe</b>         | <b>878,517</b>                   |                                   |               |                      |              |              |                                                        |                  |                      |              |              |           |                       |
| Italy                          | 394,857                          | —                                 | —             | NA                   | NA           | NA           | —                                                      | —                | NA                   | NA           | NA           | NA        | NA                    |
| Portugal                       | 183,628                          | —                                 | —             | NA                   | NA           | NA           | —                                                      | —                | NA                   | NA           | NA           | NA        | NA                    |
| Greece                         | 141,937                          | —                                 | —             | NA                   | NA           | NA           | —                                                      | —                | NA                   | NA           | NA           | NA        | NA                    |
| Spain                          | 158,095                          | —                                 | —             | NA                   | NA           | NA           | —                                                      | —                | NA                   | NA           | NA           | NA        | NA                    |
| <b>Northern/Western Europe</b> | <b>2,816,583</b>                 |                                   |               |                      |              |              |                                                        |                  |                      |              |              |           |                       |
| United Kingdom                 | 882,828                          | —                                 | —             | NA                   | NA           | NA           | —                                                      | —                | NA                   | NA           | NA           | NA        | NA                    |
| Germany                        | 1,149,413                        | —                                 | —             | NA                   | NA           | NA           | —                                                      | —                | NA                   | NA           | NA           | NA        | NA                    |
| France                         | 253,868                          | —                                 | —             | NA                   | NA           | NA           | —                                                      | —                | NA                   | NA           | NA           | NA        | NA                    |
| Ireland                        | 141,434                          | —                                 | —             | NA                   | NA           | NA           | —                                                      | —                | NA                   | NA           | NA           | NA        | NA                    |
| Netherlands                    | 104,658                          | —                                 | —             | NA                   | NA           | NA           | —                                                      | —                | NA                   | NA           | NA           | NA        | NA                    |
| No./West Europe, other/n.s.    | 284,382                          | —                                 | —             | NA                   | NA           | NA           | —                                                      | —                | NA                   | NA           | NA           | NA        | NA                    |
| <b>Europe, not specified</b>   | <b>33,270</b>                    | —                                 | —             | <b>NA</b>            | <b>NA</b>    | <b>NA</b>    | —                                                      | —                | <b>NA</b>            | <b>NA</b>    | <b>NA</b>    | <b>NA</b> | <b>NA</b>             |

Abbreviations: CHB, chronic hepatitis B; CI, confidence interval; FB, foreign-born; n.s., difference not statistically significant; PUMS, Public Use Microdata Sample; RE, random effects.

P-values are for Z-test comparing RE pooled prevalence for surveys in emigrants and surveys in in-country populations (15)

If only one study is available; rate is as reported with 95% CIs from standard error.

†Random effects rate cannot be calculated because tau<sup>2</sup><0; fixed effect rate is shown.

Northern America = FB from Canada and Bermuda living in the U.S.

For Japan, Northern America, Australia, New Zealand, and southern, northern, and western Europe, which have low CHB rates and relatively modest numbers of emigrants to the U.S., rates from reviews were used instead of rates from systematic review and meta-analyses. Male-specific data and female-specific data from the same survey are entered separately and counted as two surveys.

Appendix Table A7a. Comparison of RE CHB Pooled Prevalence Rates by Decade of Survey for All Countries

| Country/Region              | Before 1990 |                  |                      |              |              | 1990–1999  |                   |                      |              |              | 2000–2009  |                   |                      |              |              |
|-----------------------------|-------------|------------------|----------------------|--------------|--------------|------------|-------------------|----------------------|--------------|--------------|------------|-------------------|----------------------|--------------|--------------|
|                             | Surveys     | Sample           | RE Pooled Prevalence | Lower 95% CI | Upper 95% CI | Surveys    | Sample            | RE Pooled Prevalence | Lower 95% CI | Upper 95% CI | Surveys    | Sample            | RE Pooled Prevalence | Lower 95% CI | Upper 95% CI |
| <b>Asia</b>                 | <b>310</b>  | <b>7,058,420</b> |                      |              |              | <b>395</b> | <b>12,209,249</b> |                      |              |              | <b>637</b> | <b>10,460,960</b> |                      |              |              |
| <b>Eastern Asia</b>         | <b>122</b>  | <b>6,584,476</b> |                      |              |              | <b>186</b> | <b>11,504,979</b> |                      |              |              | <b>292</b> | <b>9,147,752</b>  |                      |              |              |
| China (including Hong Kong) | 56          | 367,756          | 11.59%               | 10.50%       | 12.68%       | 71         | 276,559           | 10.47%               | 9.50%        | 11.43%       | 121        | 3,163,337         | 8.78%                | 8.26%        | 9.30%        |
| Taiwan                      | 47          | 4,934,367        | 14.71%               | 14.33%       | 15.10%       | 74         | 6,063,283         | 15.53%               | 14.62%       | 16.44%       | 103        | 3,888,334         | 10.21%               | 9.29%        | 11.12%       |
| Korea                       | 19          | 1,282,353        | 6.82%                | 5.84%        | 7.79%        | 41         | 5,165,137         | 5.15%                | 4.34%        | 5.95%        | 68         | 2,096,081         | 4.00%                | 3.47%        | 4.53%        |
| Japan                       | —           | —                | NA                   | NA           | NA           | —          | —                 | NA                   | NA           | NA           | —          | —                 | NA                   | NA           | NA           |
| Eastern Asia, other/n.s.    | —           | —                | NA                   | NA           | NA           | —          | —                 | NA                   | NA           | NA           | —          | —                 | NA                   | NA           | NA           |
| <b>South Eastern Asia</b>   | <b>96</b>   | <b>368,373</b>   |                      |              |              | <b>71</b>  | <b>250,942</b>    |                      |              |              | <b>103</b> | <b>354,130</b>    |                      |              |              |
| Philippines                 | 10          | 13,071           | 9.72%                | 7.85%        | 11.59%       | 3          | 703               | 5.00%                | 1.92%        | 8.08%        | 10         | 107,047           | 5.87%                | 4.82%        | 6.92%        |
| Vietnam                     | 23          | 32,913           | 12.88%               | 11.37%       | 14.39%       | 21         | 8,449             | 13.50%               | 11.58%       | 15.42%       | 26         | 41,264            | 10.51%               | 9.42%        | 11.59%       |
| Thailand                    | 15          | 8,732            | 10.78%               | 7.60%        | 13.97%       | 25         | 161,072           | 4.30%                | 3.72%        | 4.89%        | 26         | 151,150           | 5.73%                | 4.94%        | 6.52%        |
| Laos                        | 9           | 14,838           | 14.58%               | 12.35%       | 16.81%       | 3          | 642               | 12.03%               | 5.44%        | 18.61%       | 9          | 6,809             | 8.58%                | 6.47%        | 10.70%       |
| Cambodia                    | 6           | 5,371            | 13.95%               | 10.75%       | 17.14%       | 5          | 730               | 8.31%†               | 6.31%        | 10.31%       | 7          | 6,644             | 7.26%                | 4.65%        | 9.87%        |
| Indonesia                   | 8           | 3,317            | 3.89%                | 2.39%        | 5.38%        | 5          | 10,972            | 4.50%                | 3.45%        | 5.56%        | 7          | 15,588            | 2.02%                | 1.65%        | 2.38%        |
| Myanmar                     | 0           | 0                | —                    | —            | —            | 0          | 0                 | —                    | —            | —            | 6          | 5,786             | 10.11%               | 7.37%        | 12.85%       |
| Malaysia                    | 7           | 198,846          | 4.91%                | 3.68%        | 6.14%        | 4          | 62,380            | 4.44%                | 1.32%        | 7.56%        | 9          | 11,774            | 1.84%                | 1.09%        | 2.60%        |
| Singapore                   | 18          | 91,285           | 7.04%                | 5.83%        | 8.25%        | 5          | 5,994             | 3.44%                | 1.35%        | 5.52%        | 3          | 8,068             | 2.70%                | 2.35%        | 3.05%        |
| <b>South Central Asia</b>   | <b>40</b>   | <b>45,183</b>    |                      |              |              | <b>73</b>  | <b>284,325</b>    |                      |              |              | <b>148</b> | <b>555,257</b>    |                      |              |              |
| India                       | 18          | 24,214           | 3.31%                | 2.62%        | 4.00%        | 28         | 44,574            | 4.15%                | 3.45%        | 4.84%        | 49         | 304,890           | 1.81%                | 1.58%        | 2.03%        |
| Iran                        | 3           | 5,223            | 2.44%                | 2.01%        | 2.88%        | 3          | 91,000            | 2.20%                | 1.72%        | 2.68%        | 34         | 105,891           | 3.17%                | 2.33%        | 4.00%        |
| Pakistan                    | 3           | 1,570            | 7.28%                | 2.75%        | 11.82%       | 7          | 84,690            | 4.00%                | 2.48%        | 5.51%        | 42         | 122,465           | 3.64%                | 3.01%        | 4.27%        |
| Bangladesh                  | 2           | 1,076            | 5.63%                | 1.52%        | 9.75%        | 17         | 53,528            | 4.66%                | 3.74%        | 5.58%        | 7          | 10,775            | 5.36%                | 2.39%        | 8.34%        |
| Afghanistan                 | 1           | 418              | 4.10%                | 2.20%        | 6.00%        | 0          | 0                 | —                    | —            | —            | 8          | 9,378             | 5.58%                | 3.75%        | 7.40%        |
| Uzbekistan                  | 4           | 10,134           | 5.67%                | 4.49%        | 6.86%        | 3          | 1,123             | 12.70%               | 9.72%        | 15.67%       | 3          | 689               | 2.84%                | -0.09%       | 5.77%        |
| Nepal                       | 7           | 2,140            | 3.15%                | 1.50%        | 4.81%        | 13         | 7,497             | 1.93%                | 1.27%        | 2.59%        | 3          | 879               | 4.28%                | 0.81%        | 7.74%        |
| Sri Lanka                   | 0           | 0                | —                    | —            | —            | 2          | 1,913             | 2.41%                | -0.72%       | 5.53%        | 0          | 0                 | —                    | —            | —            |
| Kazakhstan                  | 2           | 408              | 6.34%†               | 3.98%        | 8.71%        | 0          | 0                 | —                    | —            | —            | 2          | 290               | 3.75%†               | 1.57%        | 5.94%        |
| So Central Asia, other/n.s. | —           | —                | NA                   | NA           | NA           | —          | —                 | NA                   | NA           | NA           | —          | —                 | NA                   | NA           | NA           |
| <b>Western Asia</b>         | <b>52</b>   | <b>60,388</b>    |                      |              |              | <b>65</b>  | <b>169,003</b>    |                      |              |              | <b>94</b>  | <b>403,821</b>    |                      |              |              |
| Iraq                        | 0           | 0                | —                    | —            | —            | 0          | 0                 | —                    | —            | —            | 5          | 12,409            | 1.42%                | 0.63%        | 2.22%        |
| Israel                      | 6           | 15,475           | 2.34%                | 1.33%        | 3.35%        | 5          | 6,993             | 2.28%                | 0.48%        | 4.08%        | 1          | 3,115             | 0.51%                | 0.26%        | 0.76%        |
| Lebanon                     | 1           | 2,356            | 1.70%                | 1.18%        | 2.22%        | 5          | 5,931             | 1.61%                | 0.59%        | 2.63%        | 3          | 23,374            | 0.99%                | 0.56%        | 1.42%        |
| Turkey                      | 5           | 4,989            | 8.55%                | 7.61%        | 9.50%        | 36         | 88,592            | 5.92%                | 5.16%        | 6.68%        | 55         | 226,357           | 3.95%                | 3.35%        | 4.55%        |
| Armenia                     | 0           | 0                | —                    | —            | —            | 3          | 16,585            | 0.55%                | 0.17%        | 0.93%        | 1          | 74                | 1.40%                | -1.28%       | 4.08%        |
| Syria                       | 0           | 0                | —                    | —            | —            | 0          | 0                 | —                    | —            | —            | 1          | 3,168             | 5.62%                | 4.82%        | 6.42%        |
| Jordan                      | 5           | 1,115            | 8.67%                | 5.55%        | 11.78%       | 0          | 0                 | —                    | —            | —            | 3          | 1,192             | 3.13%                | 0.96%        | 5.30%        |
| Saudi Arabia                | 28          | 33,444           | 9.33%                | 8.03%        | 10.62%       | 10         | 46,831            | 5.75%                | 4.57%        | 6.92%        | 14         | 127,340           | 3.12%                | 2.12%        | 4.13%        |
| Yemen                       | 4           | 879              | 12.63%               | 9.70%        | 15.55%       | 5          | 3,236             | 11.10%               | 7.19%        | 15.01%       | 5          | 959               | 12.42%               | 6.41%        | 18.43%       |
| Kuwait                      | 1           | 1,554            | 2.90%                | 2.07%        | 3.73%        | 0          | 0                 | —                    | —            | —            | 1          | 2,581             | 4.80%                | 3.98%        | 5.62%        |
| Azerbaijan                  | 2           | 576              | 2.54%                | 0.32%        | 4.76%        | 1          | 835               | 4.10%                | 2.76%        | 5.44%        | 3          | 2,552             | 3.13%                | 2.46%        | 3.81%        |
| Georgia                     | 0           | 0                | —                    | —            | —            | 0          | 0                 | —                    | —            | —            | 2          | 700               | 3.89%                | 1.25%        | 6.54%        |
| Western Asia, other/n.s.    | —           | —                | NA                   | NA           | NA           | —          | —                 | NA                   | NA           | NA           | —          | —                 | NA                   | NA           | NA           |
| <b>Asia, n.s.</b>           | <b>—</b>    | <b>—</b>         | <b>NA</b>            | <b>NA</b>    | <b>NA</b>    | <b>—</b>   | <b>—</b>          | <b>NA</b>            | <b>NA</b>    | <b>NA</b>    | <b>—</b>   | <b>—</b>          | <b>NA</b>            | <b>NA</b>    | <b>NA</b>    |

Appendix Table A7a—Continued

| Country/Region               | Before 1990 |                |                      |              |              | 1990–1999  |                  |                      |              |              | 2000–2009 |                |                      |              |              |
|------------------------------|-------------|----------------|----------------------|--------------|--------------|------------|------------------|----------------------|--------------|--------------|-----------|----------------|----------------------|--------------|--------------|
|                              | Surveys     | Sample         | RE Pooled Prevalence | Lower 95% CI | Upper 95% CI | Surveys    | Sample           | RE Pooled Prevalence | Lower 95% CI | Upper 95% CI | Surveys   | Sample         | RE Pooled Prevalence | Lower 95% CI | Upper 95% CI |
| <b>Americas</b>              | <b>51</b>   | <b>192,073</b> |                      |              |              | <b>128</b> | <b>1,855,200</b> |                      |              |              | <b>81</b> | <b>618,700</b> |                      |              |              |
| <b>Central America</b>       | <b>9</b>    | <b>82,499</b>  |                      |              |              | <b>33</b>  | <b>644,063</b>   |                      |              |              | <b>24</b> | <b>232,790</b> |                      |              |              |
| Mexico                       | 3           | 818            | 2.17%                | -0.02%       | 4.37%        | 8          | 27,274           | 0.21%                | 0.05%        | 0.38%        | 15        | 21,302         | 0.53%                | 0.34%        | 0.73%        |
| El Salvador                  | 1           | 126            | 1.59%                | -0.60%       | 3.77%        | 5          | 258,299          | 0.47%                | 0.34%        | 0.59%        | 1         | 73,594         | 0.29%                | 0.25%        | 0.33%        |
| Guatemala                    | 1           | 600            | 17.30%               | 14.27%       | 20.33%       | 5          | 2,510            | 1.48%                | 1.01%        | 1.95%        | 2         | 42,510         | 0.18%                | 0.13%        | 0.24%        |
| Honduras                     | 0           | 0              | —                    | —            | —            | 5          | 164,248          | 0.60%                | 0.42%        | 0.78%        | 1         | 40,755         | 0.39%                | 0.33%        | 0.45%        |
| Nicaragua                    | 0           | 0              | —                    | —            | —            | 2          | 1,452            | 0.68%                | -0.41%       | 1.78%        | 0         | 0              | —                    | —            | —            |
| Panama                       | 2           | 80,417         | 1.45%                | -0.01%       | 2.91%        | 5          | 187,641          | 0.77%                | 0.43%        | 1.11%        | 1         | 42,867         | 0.17%                | 0.13%        | 0.21%        |
| Costa Rica                   | 2           | 538            | 0.57%†               | -0.07%       | 1.20%        | 0          | 0                | —                    | —            | —            | 0         | 0              | —                    | —            | —            |
| Belize                       | 0           | 0              | —                    | —            | —            | 3          | 2,639            | 1.02%                | 0.06%        | 1.98%        | 4         | 11,762         | 1.45%                | 1.03%        | 1.86%        |
| <b>Caribbean</b>             | <b>14</b>   | <b>3,404</b>   |                      |              |              | <b>12</b>  | <b>9,171</b>     |                      |              |              | <b>10</b> | <b>71,089</b>  |                      |              |              |
| Cuba                         | 1           | 550            | 0.40%                | -0.13%       | 0.93%        | 4          | 2,200            | 0.92%                | 0.52%        | 1.32%        | 2         | 19,878         | 1.00%†               | 0.86%        | 1.13%        |
| Dominican Republic           | 5           | 683            | 6.58%                | 3.53%        | 9.63%        | 2          | 685              | 5.21%                | -1.74%       | 12.15%       | 1         | 1,024          | 0.95%                | 0.36%        | 1.54%        |
| Jamaica                      | 0           | 0              | —                    | —            | —            | 3          | 776              | 0.39%                | -0.35%       | 1.13%        | 1         | 525            | 12.00%               | 9.22%        | 14.78%       |
| Haiti                        | 7           | 1,671          | 7.46%                | 4.54%        | 10.37%       | 2          | 2,608            | 5.05%†               | 4.21%        | 5.89%        | 3         | 14,612         | 4.30%                | 3.33%        | 5.27%        |
| Trinidad and Tobago          | 0           | 0              | —                    | —            | —            | 0          | 0                | —                    | —            | —            | 2         | 31,569         | 0.71%                | 0.49%        | 0.94%        |
| Barbados                     | 1           | 500            | 1.40%                | 0.37%        | 2.43%        | 1          | 2,902            | 0.40%                | 0.17%        | 0.63%        | 1         | 3,481          | 0.30%                | 0.12%        | 0.48%        |
| Caribbean, other/n.s.        | —           | —              | NA                   | NA           | NA           | —          | —                | NA                   | NA           | NA           | —         | —              | NA                   | NA           | NA           |
| <b>South America</b>         | <b>28</b>   | <b>106,170</b> |                      |              |              | <b>83</b>  | <b>1,201,966</b> |                      |              |              | <b>47</b> | <b>314,821</b> |                      |              |              |
| Colombia                     | 0           | 0              | —                    | —            | —            | 1          | 69               | 7.25%                | 1.13%        | 13.37%       | 3         | 4,556          | 0.71%                | -0.06%       | 1.48%        |
| Ecuador                      | 8           | 91,807         | 0.53%                | 0.44%        | 0.63%        | 4          | 402,494          | 0.41%                | 0.37%        | 0.45%        | 0         | 0              | —                    | —            | —            |
| Peru                         | 6           | 5,637          | 1.85%                | 0.52%        | 3.18%        | 15         | 4,558            | 2.68%                | 1.67%        | 3.69%        | 3         | 3,775          | 0.40%†               | 0.20%        | 0.61%        |
| Brazil                       | 7           | 5,479          | 0.99%                | 0.35%        | 1.62%        | 39         | 36,042           | 2.19%                | 1.76%        | 2.63%        | 34        | 152,718        | 1.32%                | 1.11%        | 1.53%        |
| Guyana                       | 0           | 0              | —                    | —            | —            | 0          | 0                | —                    | —            | —            | 0         | 0              | —                    | —            | —            |
| Argentina                    | 2           | 1,026          | 0.46%                | -0.20%       | 1.13%        | 3          | 1,572            | 2.17%†               | 1.45%        | 2.89%        | 2         | 5,108          | 0.23%†               | 0.10%        | 0.36%        |
| Venezuela                    | 2           | 909            | 0.86%                | -0.08%       | 1.80%        | 7          | 1,949            | 2.66%                | 1.79%        | 3.53%        | 1         | 142            | 0.70%                | -0.67%       | 2.07%        |
| Chile                        | 2           | 1,162          | 0.34%†               | 0.01%        | 0.67%        | 3          | 635              | 0.57%†               | -0.02%       | 1.15%        | 0         | 0              | —                    | —            | —            |
| Bolivia                      | 1           | 150            | 2.00%                | -0.24%       | 4.24%        | 1          | 187              | 5.30%                | 2.09%        | 8.51%        | 2         | 1,593          | 2.80%                | -3.00%       | 8.59%        |
| Uruguay                      | 0           | 0              | —                    | —            | —            | 5          | 570,070          | 0.40%                | 0.30%        | 0.49%        | 1         | 101,669        | 0.31%                | 0.28%        | 0.34%        |
| Paraguay                     | 0           | 0              | —                    | —            | —            | 5          | 184,391          | 0.87%                | 0.56%        | 1.18%        | 1         | 45,260         | 0.37%                | 0.31%        | 0.43%        |
| South America, other/n.s.    | —           | —              | NA                   | NA           | NA           | —          | —                | NA                   | NA           | NA           | —         | —              | NA                   | NA           | NA           |
| <b>Northern America</b>      | <b>0</b>    | <b>0</b>       |                      |              |              |            |                  |                      |              |              |           |                |                      |              |              |
| Canada                       | —           | —              | NA                   | NA           | NA           | —          | —                | NA                   | NA           | NA           | —         | —              | NA                   | NA           | NA           |
| Northern America, other/n.s. | —           | —              | NA                   | NA           | NA           | —          | —                | NA                   | NA           | NA           | —         | —              | NA                   | NA           | NA           |
| <b>Americas, n.s.</b>        | <b>—</b>    | <b>—</b>       | <b>NA</b>            | <b>NA</b>    | <b>NA</b>    | <b>—</b>   | <b>—</b>         | <b>NA</b>            | <b>NA</b>    | <b>NA</b>    | <b>—</b>  | <b>—</b>       | <b>NA</b>            | <b>NA</b>    | <b>NA</b>    |
| <b>Oceania</b>               | <b>28</b>   | <b>9,253</b>   |                      |              |              | <b>15</b>  | <b>48,399</b>    |                      |              |              | <b>18</b> | <b>17,491</b>  |                      |              |              |
| Australia                    | —           | —              | NA                   | NA           | NA           | —          | —                | NA                   | NA           | NA           | —         | —              | NA                   | NA           | NA           |
| New Zealand                  | —           | —              | NA                   | NA           | NA           | —          | —                | NA                   | NA           | NA           | —         | —              | NA                   | NA           | NA           |
| Fiji                         | 6           | 1,184          | 7.52%                | 3.00%        | 12.03%       | 5          | 17,085           | 4.19%                | 2.16%        | 6.22%        | 4         | 7,327          | 2.70%                | 0.49%        | 4.90%        |
| Tonga                        | 2           | 414            | 20.36%               | 15.47%       | 25.25%       | 5          | 11,354           | 11.31%               | 6.85%        | 15.78%       | 4         | 3,534          | 8.97%                | 3.30%        | 14.65%       |
| Micronesia                   | 13          | 6,477          | 20.47%               | 16.01%       | 24.93%       | 3          | 470              | 15.06%               | 2.17%        | 27.95%       | 8         | 2,625          | 4.84%                | 2.90%        | 6.77%        |
| Samoa                        | 7           | 1,178          | 4.73%                | 2.08%        | 7.37%        | 2          | 19,490           | 4.5%†                | 4.21%        | 4.79%        | 2         | 4,005          | 3.19%                | 2.65%        | 3.74%        |
|                              | —           | —              | NA                   | NA           | NA           | —          | —                | NA                   | NA           | NA           | —         | —              | NA                   | NA           | NA           |

Appendix Table A7a—Continued

| Country/Region              | Before 1990 |                |                      |              |              | 1990–1999  |               |                      |              |              | 2000–2009  |                |                      |              |              |
|-----------------------------|-------------|----------------|----------------------|--------------|--------------|------------|---------------|----------------------|--------------|--------------|------------|----------------|----------------------|--------------|--------------|
|                             | Surveys     | Sample         | RE Pooled Prevalence | Lower 95% CI | Upper 95% CI | Surveys    | Sample        | RE Pooled Prevalence | Lower 95% CI | Upper 95% CI | Surveys    | Sample         | RE Pooled Prevalence | Lower 95% CI | Upper 95% CI |
| <b>Africa</b>               | <b>165</b>  | <b>151,439</b> |                      |              |              | <b>115</b> | <b>84,523</b> |                      |              |              | <b>123</b> | <b>145,416</b> |                      |              |              |
| <b>Eastern Africa</b>       | <b>76</b>   | <b>31,744</b>  |                      |              |              | <b>29</b>  | <b>22,514</b> |                      |              |              | <b>33</b>  | <b>42,692</b>  |                      |              |              |
| Ethiopia                    | 26          | 15,215         | 10.37%               | 8.64%        | 12.10%       | 6          | 11,811        | 10.10%               | 6.62%        | 13.58%       | 7          | 3,129          | 5.03%                | 2.83%        | 7.23%        |
| Kenya                       | 19          | 8,734          | 5.38%                | 3.95%        | 6.80%        | 0          | 0             | —                    | —            | —            | 7          | 4,815          | 7.57%                | 3.54%        | 11.61%       |
| Somalia                     | 9           | 1,329          | 12.07%               | 7.12%        | 17.03%       | 3          | 1,195         | 19.76%               | 15.84%       | 23.69%       | 6          | 3,216          | 8.04%                | 1.10%        | 14.98%       |
| Uganda                      | 4           | 908            | 8.20%                | 5.71%        | 10.69%       | 3          | 567           | 6.86%                | 3.05%        | 10.67%       | 5          | 6,755          | 10.08%               | 6.23%        | 13.93%       |
| Eritrea                     | 0           | 0              | —                    | —            | —            | 2          | 171           | 15.52%               | 2.02%        | 29.02%       | 0          | 0              | —                    | —            | —            |
| Tanzania                    | 5           | 693            | 6.80%                | 4.68%        | 8.93%        | 9          | 3,163         | 5.53%                | 4.03%        | 7.04%        | 2          | 23,448         | 5.08%                | 1.57%        | 8.59%        |
| Zimbabwe                    | 13          | 4,865          | 14.68%               | 11.70%       | 17.66%       | 6          | 5,607         | 12.94%               | 5.64%        | 20.24%       | 6          | 1,329          | 7.20%                | 3.21%        | 11.19%       |
| Eastern Africa, other/n.s.  | —           | —              | NA                   | NA           | NA           | —          | —             | NA                   | NA           | NA           | —          | —              | NA                   | NA           | NA           |
| <b>Middle Africa</b>        | <b>9</b>    | <b>2,093</b>   |                      |              |              | <b>8</b>   | <b>1,408</b>  |                      |              |              | <b>2</b>   | <b>1,616</b>   |                      |              |              |
| Cameroon                    | 9           | 2,093          | 14.51%               | 9.57%        | 19.46%       | 8          | 1,408         | 7.57%                | 5.59%        | 9.54%        | 2          | 1,616          | 13.49%               | 0.00%        | 26.99%       |
| Middle Africa, other/n.s.   | —           | —              | NA                   | NA           | NA           | —          | —             | NA                   | NA           | NA           | —          | —              | NA                   | NA           | NA           |
| <b>Northern Africa</b>      | <b>29</b>   | <b>11,372</b>  |                      |              |              | <b>31</b>  | <b>22,400</b> |                      |              |              | <b>22</b>  | <b>48,155</b>  |                      |              |              |
| Egypt                       | 11          | 6,609          | 7.21%                | 5.60%        | 8.82%        | 27         | 13,942        | 3.54%                | 2.74%        | 4.34%        | 12         | 3,307          | 6.05%                | 3.17%        | 8.94%        |
| Morocco                     | 3           | 1,000          | 4.51%                | 2.92%        | 6.10%        | 1          | 7,337         | 1.54%                | 1.26%        | 1.82%        | 6          | 40,900         | 1.61%                | 0.95%        | 2.26%        |
| Sudan                       | 13          | 3,586          | 22.23%               | 19.18%       | 25.27%       | 2          | 406           | 7.91%†               | 5.28%        | 10.53%       | 4          | 3,948          | 5.22%                | 4.36%        | 6.09%        |
| Algeria                     | 2           | 177            | 8.79%†               | 4.63%        | 12.96%       | 1          | 715           | 1.60%                | 0.68%        | 2.52%        | 0          | 0              | —                    | —            | —            |
| Northern Africa, other/n.s. | —           | —              | NA                   | NA           | NA           | —          | —             | NA                   | NA           | NA           | —          | —              | NA                   | NA           | NA           |
| <b>Southern Africa</b>      | <b>19</b>   | <b>85,814</b>  |                      |              |              | <b>11</b>  | <b>7,726</b>  |                      |              |              | <b>4</b>   | <b>990</b>     |                      |              |              |
| South Africa                | 19          | 85,814         | 6.50%                | 4.60%        | 8.40%        | 11         | 7,726         | 5.40%                | 3.32%        | 7.49%        | 4          | 990            | 4.99%                | 2.29%        | 7.68%        |
| Southern Africa, other/n.s. | —           | —              | NA                   | NA           | NA           | —          | —             | NA                   | NA           | NA           | —          | —              | NA                   | NA           | NA           |
| <b>Western Africa</b>       | <b>32</b>   | <b>20,416</b>  |                      |              |              | <b>36</b>  | <b>30,475</b> |                      |              |              | <b>62</b>  | <b>51,963</b>  |                      |              |              |
| Nigeria                     | 14          | 3,178          | 11.35%               | 8.64%        | 14.06%       | 21         | 10,399        | 18.03%               | 14.31%       | 21.75%       | 40         | 31,887         | 9.82%                | 8.03%        | 11.62%       |
| Ghana                       | 0           | 0              | —                    | —            | —            | 3          | 1,495         | 12.58%               | 5.30%        | 19.87%       | 12         | 4,605          | 12.31%               | 9.18%        | 15.44%       |
| Liberia                     | 5           | 1,741          | 18.14%               | 10.62%       | 25.65%       | 1          | 352           | 15.00%               | 11.27%       | 18.73%       | 1          | 433            | 12.20%               | 9.12%        | 15.28%       |
| Cape Verde                  | 2           | 179            | 5.65%                | 0.16%        | 11.14%       | 0          | 0             | —                    | —            | —            | 0          | 0              | —                    | —            | —            |
| Sierra Leone                | 0           | 0              | —                    | —            | —            | 2          | 245           | 13.49%               | 7.05%        | 19.92%       | 3          | 908            | 10.08%               | 5.61%        | 14.55%       |
| Senegal                     | 10          | 14,553         | 11.72%               | 9.51%        | 13.92%       | 6          | 16,722        | 13.03%               | 7.87%        | 18.18%       | 4          | 3,390          | 12.32%               | 10.08%       | 14.56%       |
| Guinea                      | 1           | 765            | 18.20%               | 15.47%       | 20.93%       | 3          | 1,262         | 15.38%†              | 13.39%       | 17.37%       | 2          | 10,740         | 13.47%               | 11.77%       | 15.17%       |
| Western Africa, other/n.s.  | —           | —              | NA                   | NA           | NA           | —          | —             | NA                   | NA           | NA           | —          | —              | NA                   | NA           | NA           |
| <b>Africa, n.s.</b>         | <b>—</b>    | <b>—</b>       | <b>NA</b>            | <b>NA</b>    | <b>NA</b>    | <b>—</b>   | <b>—</b>      | <b>NA</b>            | <b>NA</b>    | <b>NA</b>    | <b>—</b>   | <b>—</b>       | <b>NA</b>            | <b>NA</b>    | <b>NA</b>    |

Appendix Table A7a—Continued

| Country/Region                 | Before 1990 |                |                      |              |              | 1990–1999 |                |                      |              |              | 2000–2009 |                |                      |              |              |
|--------------------------------|-------------|----------------|----------------------|--------------|--------------|-----------|----------------|----------------------|--------------|--------------|-----------|----------------|----------------------|--------------|--------------|
|                                | Surveys     | Sample         | RE Pooled Prevalence | Lower 95% CI | Upper 95% CI | Surveys   | Sample         | RE Pooled Prevalence | Lower 95% CI | Upper 95% CI | Surveys   | Sample         | RE Pooled Prevalence | Lower 95% CI | Upper 95% CI |
| <b>Europe</b>                  | <b>42</b>   | <b>490,020</b> |                      |              |              | <b>56</b> | <b>142,796</b> |                      |              |              | <b>65</b> | <b>921,576</b> |                      |              |              |
| <b>Eastern Europe</b>          | <b>42</b>   | <b>490,020</b> |                      |              |              | <b>56</b> | <b>142,796</b> |                      |              |              | <b>65</b> | <b>921,576</b> |                      |              |              |
| Poland                         | 4           | 1,473          | 2.38%                | 1.22%        | 3.53%        | 3         | 27,837         | 1.21%                | 0.86%        | 1.55%        | 9         | 42,657         | 1.37%                | 0.76%        | 1.99%        |
| Russia                         | 11          | 37,565         | 2.96%                | 1.83%        | 4.09%        | 6         | 20,278         | 3.35%                | 0.70%        | 6.01%        | 5         | 483,417        | 2.50%                | 1.88%        | 3.12%        |
| Ukraine                        | 0           | 0              | —                    | —            | —            | 1         | 487            | 1.60%                | 0.49%        | 2.71%        | 3         | 15,076         | 1.94%                | 0.57%        | 3.31%        |
| Romania                        | 5           | 3,508          | 9.80%                | 6.27%        | 13.34%       | 15        | 11,100         | 9.70%                | 7.41%        | 12.00%       | 10        | 135,070        | 5.19%                | 4.76%        | 5.63%        |
| Yugoslavia                     | 1           | 63             | 4.76%                | -0.50%       | 10.02%       | 3         | 2,004          | 4.26%                | 0.39%        | 8.13%        | 1         | 526            | 2.90%                | 1.47%        | 4.33%        |
| Bosnia and Herzegovina         | 0           | 0              | —                    | —            | —            | 0         | 0              | —                    | —            | —            | 3         | 8,942          | 1.36%                | 0.53%        | 2.19%        |
| Hungary                        | 2           | 33,528         | 0.51%†               | 0.43%        | 0.58%        | 0         | 0              | —                    | —            | —            | 1         | 998            | 1.80%                | 0.98%        | 2.62%        |
| Albania                        | 0           | 0              | —                    | —            | —            | 8         | 3,936          | 14.69%               | 11.09%       | 18.28%       | 14        | 78,321         | 9.35%                | 8.19%        | 10.51%       |
| Czech Republic & Slovakia      | 5           | 6,163          | 0.79%                | 0.35%        | 1.23%        | 2         | 12,922         | 2.01%                | -1.50%       | 5.52%        | 5         | 20,177         | 1.09%                | 0.10%        | 2.08%        |
| Belarus                        | 2           | 30,670         | 3.41%                | 1.69%        | 5.14%        | 1         | 100            | 2.00%                | -0.74%       | 4.74%        | 1         | 57             | 3.50%                | -1.27%       | 8.27%        |
| Bulgaria                       | 8           | 371,319        | 2.92%                | 1.97%        | 3.87%        | 1         | 2,211          | 3.90%                | 3.09%        | 4.71%        | 2         | 64,516         | 9.74%                | 8.99%        | 10.50%       |
| Moldova                        | 1           | 1,248          | 9.00%                | 7.41%        | 10.59%       | 3         | 1,763          | 11.45%               | 6.45%        | 16.45%       | 2         | 956            | 8.62%                | 3.93%        | 13.30%       |
| Croatia                        | 0           | 0              | —                    | —            | —            | 5         | 56,265         | 1.47%                | 0.84%        | 2.10%        | 0         | 0              | —                    | —            | —            |
| Former USSR                    | 3           | 4,483          | 4.66%                | 3.69%        | 5.63%        | 7         | 3,472          | 3.44%                | 2.01%        | 4.88%        | 0         | 0              | —                    | —            | —            |
| Lithuania                      | 0           | 0              | —                    | —            | —            | 1         | 421            | 2.14%                | 0.76%        | 3.52%        | 6         | 35,913         | 2.02%                | 1.32%        | 2.72%        |
| Latvia                         | 0           | 0              | —                    | —            | —            | 0         | 0              | —                    | —            | —            | 3         | 34,950         | 1.39%                | 1.10%        | 1.67%        |
| Macedonia                      | 0           | 0              | —                    | —            | —            | 0         | 0              | —                    | —            | —            | 0         | 0              | —                    | —            | —            |
| Eastern Europe, other/n.s.     | —           | —              | NA                   | NA           | NA           | —         | —              | NA                   | NA           | NA           | —         | —              | NA                   | NA           | NA           |
| <b>Southern Europe</b>         | <b>0</b>    | <b>0</b>       |                      |              |              | <b>0</b>  | <b>0</b>       |                      |              |              | <b>0</b>  | <b>0</b>       |                      |              |              |
| Italy                          | —           | —              | NA                   | NA           | NA           | —         | —              | NA                   | NA           | NA           | —         | —              | NA                   | NA           | NA           |
| Portugal                       | —           | —              | NA                   | NA           | NA           | —         | —              | NA                   | NA           | NA           | —         | —              | NA                   | NA           | NA           |
| Greece                         | —           | —              | NA                   | NA           | NA           | —         | —              | NA                   | NA           | NA           | —         | —              | NA                   | NA           | NA           |
| Spain                          | —           | —              | NA                   | NA           | NA           | —         | —              | NA                   | NA           | NA           | —         | —              | NA                   | NA           | NA           |
| <b>Northern/Western Europe</b> | <b>0</b>    | <b>0</b>       |                      |              |              | <b>0</b>  | <b>0</b>       |                      |              |              | <b>0</b>  | <b>0</b>       |                      |              |              |
| United Kingdom                 | —           | —              | NA                   | NA           | NA           | —         | —              | NA                   | NA           | NA           | —         | —              | NA                   | NA           | NA           |
| Germany                        | —           | —              | NA                   | NA           | NA           | —         | —              | NA                   | NA           | NA           | —         | —              | NA                   | NA           | NA           |
| France                         | —           | —              | NA                   | NA           | NA           | —         | —              | NA                   | NA           | NA           | —         | —              | NA                   | NA           | NA           |
| Ireland                        | —           | —              | NA                   | NA           | NA           | —         | —              | NA                   | NA           | NA           | —         | —              | NA                   | NA           | NA           |
| Netherlands                    | —           | —              | NA                   | NA           | NA           | —         | —              | NA                   | NA           | NA           | —         | —              | NA                   | NA           | NA           |
| No./West Europe, other/n.s.    | —           | —              | NA                   | NA           | NA           | —         | —              | NA                   | NA           | NA           | —         | —              | NA                   | NA           | NA           |
| <b>Europe, other/n.s.</b>      | <b>—</b>    | <b>—</b>       | <b>NA</b>            | <b>NA</b>    | <b>NA</b>    | <b>—</b>  | <b>—</b>       | <b>NA</b>            | <b>NA</b>    | <b>NA</b>    | <b>—</b>  | <b>—</b>       | <b>NA</b>            | <b>NA</b>    | <b>NA</b>    |



Appendix Table A7b. Comparison of RE CHB Pooled Prevalence Rates by Decade of Survey for All Countries

| Country/Region              | 2000–2019  |                   |                      |              |              | Subgroup P-value          |                           |                           |
|-----------------------------|------------|-------------------|----------------------|--------------|--------------|---------------------------|---------------------------|---------------------------|
|                             | Surveys    | Sample            | RE Pooled Prevalence | Lower 95% CI | Upper 95% CI | Before 1990 vs. 1990–1999 | Before 1990 vs. 2000–2009 | Before 1990 vs. 2010–2019 |
| <b>Asia</b>                 | <b>343</b> | <b>77,043,409</b> |                      |              |              |                           |                           |                           |
| <b>Eastern Asia</b>         | <b>141</b> | <b>76,129,656</b> |                      |              |              |                           |                           |                           |
| China (including Hong Kong) | 114        | 74,650,985        | 7.06%                | 6.85%        | 7.28%        | 0.132                     | <0.001                    | <0.001                    |
| Taiwan                      | 12         | 1,390,657         | 10.60%               | 8.50%        | 12.70%       | 0.105                     | <0.001                    | <0.001                    |
| Korea                       | 15         | 88,014            | 3.19%                | 2.55%        | 3.83%        | 0.010                     | <0.001                    | <0.001                    |
| Japan                       | —          | —                 | NA                   | NA           | NA           | NA                        | NA                        | NA                        |
| Eastern Asia, other/n.s.    | —          | —                 | NA                   | NA           | NA           | NA                        | NA                        | NA                        |
| <b>South Eastern Asia</b>   | <b>54</b>  | <b>58,026</b>     |                      |              |              |                           |                           |                           |
| Philippines                 | 2          | 143               | 1.35%†               | -0.54%       | 3.24%        | 0.010                     | <0.001                    | <0.001                    |
| Vietnam                     | 10         | 5,830             | 9.29%                | 7.86%        | 10.72%       | 0.617                     | 0.012                     | <0.001                    |
| Thailand                    | 9          | 11,596            | 6.32%                | 3.84%        | 8.81%        | <0.001                    | 0.003                     | 0.030                     |
| Laos                        | 14         | 17,430            | 5.58%                | 4.43%        | 6.72%        | 0.472                     | <0.001                    | <0.001                    |
| Cambodia                    | 5          | 3,686             | 6.28%                | 3.17%        | 9.39%        | 0.003                     | 0.001                     | 0.001                     |
| Indonesia                   | 8          | 2,655             | 7.28%                | 4.46%        | 10.11%       | 0.511                     | 0.017                     | 0.037                     |
| Myanmar                     | 5          | 13,708            | 6.69%                | 4.75%        | 8.64%        | —                         | —                         | —                         |
| Malaysia                    | 0          | 0                 | —                    | —            | —            | 0.783                     | <0.001                    | —                         |
| Singapore                   | 1          | 2,978             | 3.60%                | 2.93%        | 4.27%        | 0.003                     | <0.001                    | <0.001                    |
| <b>South Central Asia</b>   | <b>82</b>  | <b>288,519</b>    |                      |              |              |                           |                           |                           |
| India                       | 25         | 134,606           | 2.17%                | 1.77%        | 2.57%        | 0.093                     | <0.001                    | <0.001                    |
| Iran                        | 23         | 75,557            | 1.25%                | 0.97%        | 1.52%        | 0.456                     | 0.133                     | <0.001                    |
| Pakistan                    | 19         | 27,957            | 3.61%                | 2.49%        | 4.72%        | 0.178                     | 0.119                     | 0.123                     |
| Bangladesh                  | 5          | 6,848             | 2.29%                | 0.38%        | 4.19%        | 0.651                     | 0.917                     | 0.148                     |
| Afghanistan                 | 7          | 22,105            | 3.16%                | 1.96%        | 4.36%        | —                         | 0.272                     | 0.412                     |
| Uzbekistan                  | 0          | 0                 | —                    | —            | —            | <0.001                    | 0.078                     | —                         |
| Nepal                       | 3          | 21,446            | 0.55%                | 0.13%        | 0.98%        | 0.178                     | 0.566                     | 0.003                     |
| Sri Lanka                   | 0          | 0                 | —                    | —            | —            | —                         | —                         | —                         |
| Kazakhstan                  | 0          | 0                 | —                    | —            | —            | —                         | 0.115                     | —                         |
| So Central Asia, other/n.s. | —          | —                 | NA                   | NA           | NA           | NA                        | NA                        | NA                        |
| <b>Western Asia</b>         | <b>66</b>  | <b>567,208</b>    |                      |              |              |                           |                           |                           |
| Iraq                        | 6          | 81,082            | 1.01%                | 0.00%        | 2.03%        | —                         | —                         | —                         |
| Israel                      | 9          | 129,736           | 0.61%                | 0.49%        | 0.73%        | 0.954                     | 0.001                     | 0.001                     |
| Lebanon                     | 2          | 31,147            | 1.74%†               | 1.59%        | 1.88%        | 0.876                     | 0.039                     | 0.887                     |
| Turkey                      | 19         | 219,825           | 2.76%                | 2.09%        | 3.43%        | <0.001                    | <0.001                    | <0.001                    |
| Armenia                     | 1          | 316               | 3.16%                | 1.23%        | 5.09%        | —                         | —                         | —                         |
| Syria                       | 9          | 56,880            | 1.39%                | 1.14%        | 1.65%        | —                         | —                         | —                         |
| Jordan                      | 0          | 0                 | —                    | —            | —            | —                         | 0.004                     | —                         |
| Saudi Arabia                | 12         | 36,469            | 3.09%                | 2.12%        | 4.06%        | <0.001                    | <0.001                    | <0.001                    |
| Yemen                       | 3          | 954               | 4.29%                | 0.02%        | 8.56%        | 0.541                     | 0.952                     | 0.002                     |
| Kuwait                      | 1          | 1,457             | 0.34%                | 0.04%        | 0.64%        | —                         | 0.002                     | <0.001                    |
| Azerbaijan                  | 2          | 1,983             | 4.38%                | 2.38%        | 6.37%        | 0.239                     | 0.617                     | 0.228                     |
| Georgia                     | 2          | 7,359             | 3.65%                | 1.67%        | 5.64%        | —                         | —                         | —                         |
| Western Asia, other/n.s.    | —          | —                 | NA                   | NA           | NA           | NA                        | NA                        | NA                        |
| <b>Asia, n.s.</b>           | <b>—</b>   | <b>—</b>          | <b>NA</b>            | <b>NA</b>    | <b>NA</b>    | <b>NA</b>                 | <b>NA</b>                 | <b>NA</b>                 |

Appendix Table A7b—Continued

| Country/Region               | 2000–2019 |                |                      |              |              | Subgroup P-value          |                           |                           |
|------------------------------|-----------|----------------|----------------------|--------------|--------------|---------------------------|---------------------------|---------------------------|
|                              | Surveys   | Sample         | RE Pooled Prevalence | Lower 95% CI | Upper 95% CI | Before 1990 vs. 1990–1999 | Before 1990 vs. 2000–2009 | Before 1990 vs. 2010–2019 |
| <b>Americas</b>              | <b>26</b> | <b>202,751</b> |                      |              |              |                           |                           |                           |
| <b>Central America</b>       | <b>6</b>  | <b>110,669</b> |                      |              |              |                           |                           |                           |
| Mexico                       | 1         | 1,266          | 0.19%                | -0.05%       | 0.43%        | 0.081                     | 0.144                     | 0.078                     |
| El Salvador                  | 0         | 0              | —                    | —            | —            | 0.316                     | 0.244                     | —                         |
| Guatemala                    | 1         | 439            | 0.91%                | 0.02%        | 1.80%        | <0.001                    | <0.001                    | <0.001                    |
| Honduras                     | 1         | 48,567         | 0.22%                | 0.17%        | 0.26%        | —                         | —                         | —                         |
| Nicaragua                    | 0         | 0              | —                    | —            | —            | —                         | —                         | —                         |
| Panama                       | 3         | 60,397         | 0.79%                | -0.19%       | 1.78%        | 0.372                     | 0.085                     | 0.462                     |
| Costa Rica                   | 0         | 0              | —                    | —            | —            | —                         | —                         | —                         |
| Belize                       | 0         | 0              | —                    | —            | —            | —                         | —                         | —                         |
| <b>Caribbean</b>             | <b>4</b>  | <b>44,665</b>  |                      |              |              |                           |                           |                           |
| Cuba                         | 0         | 0              | —                    | —            | —            | 0.123                     | 0.032                     | —                         |
| Dominican Republic           | 0         | 0              | —                    | —            | —            | 0.722                     | <0.001                    | —                         |
| Jamaica                      | 0         | 0              | —                    | —            | —            | —                         | —                         | —                         |
| Haiti                        | 4         | 44,665         | 2.37%                | 1.05%        | 3.69%        | 0.120                     | 0.044                     | 0.002                     |
| Trinidad and Tobago          | 0         | 0              | —                    | —            | —            | —                         | —                         | —                         |
| Barbados                     | 0         | 0              | —                    | —            | —            | 0.063                     | 0.039                     | —                         |
| Caribbean, other/n.s.        | —         | —              | NA                   | NA           | NA           | NA                        | NA                        | NA                        |
| <b>South America</b>         | <b>16</b> | <b>47,417</b>  |                      |              |              |                           |                           |                           |
| Colombia                     | 0         | 0              | —                    | —            | —            | —                         | —                         | —                         |
| Ecuador                      | 0         | 0              | —                    | —            | —            | 0.022                     | —                         | —                         |
| Peru                         | 1         | 97             | 6.19%                | 1.39%        | 10.98%       | 0.329                     | 0.035                     | 0.088                     |
| Brazil                       | 10        | 43,036         | 0.30%                | 0.15%        | 0.45%        | 0.002                     | 0.324                     | 0.039                     |
| Guyana                       | 1         | 480            | 3.96%                | 2.21%        | 5.70%        | —                         | —                         | —                         |
| Argentina                    | 4         | 3,804          | 0.22%†               | 0.07%        | 0.37%        | 0.001                     | 0.496                     | 0.485                     |
| Venezuela                    | 0         | 0              | —                    | —            | —            | 0.006                     | 0.852                     | —                         |
| Chile                        | 0         | 0              | —                    | —            | —            | 0.508                     | —                         | —                         |
| Bolivia                      | 0         | 0              | —                    | —            | —            | 0.099                     | 0.801                     | —                         |
| Uruguay                      | 0         | 0              | —                    | —            | —            | —                         | —                         | —                         |
| Paraguay                     | 0         | 0              | —                    | —            | —            | —                         | —                         | —                         |
| South America, other/n.s.    | —         | —              | NA                   | NA           | NA           | NA                        | NA                        | NA                        |
| <b>Northern America</b>      |           |                |                      |              |              |                           |                           |                           |
| Canada                       | —         | —              | NA                   | NA           | NA           | NA                        | NA                        | NA                        |
| Northern America, other/n.s. | —         | —              | NA                   | NA           | NA           | NA                        | NA                        | NA                        |
| <b>Americas, n.s.</b>        | <b>—</b>  | <b>—</b>       | <b>NA</b>            | <b>NA</b>    | <b>NA</b>    | <b>NA</b>                 | <b>NA</b>                 | <b>NA</b>                 |
| <b>Oceania</b>               | <b>1</b>  | <b>2,168</b>   |                      |              |              |                           |                           |                           |
| Australia                    | —         | —              | NA                   | NA           | NA           | NA                        | NA                        | NA                        |
| New Zealand                  | —         | —              | NA                   | NA           | NA           | NA                        | NA                        | NA                        |
| Fiji                         | 1         | 2,168          | 2.17%                | 1.55%        | 2.78%        | 0.188                     | 0.060                     | 0.021                     |
| Tonga                        | 0         | 0              | —                    | —            | —            | 0.007                     | 0.003                     | —                         |
| Micronesia                   | 0         | 0              | —                    | —            | —            | 0.437                     | <0.001                    | —                         |
| Samoa                        | 0         | 0              | —                    | —            | —            | 0.866                     | 0.266                     | —                         |
|                              | —         | —              | NA                   | NA           | NA           | NA                        | NA                        | NA                        |

Appendix Table A7b—Continued

| Country/Region              | 2000–2019  |                |                      |              |              | Subgroup P-value          |                           |                           |
|-----------------------------|------------|----------------|----------------------|--------------|--------------|---------------------------|---------------------------|---------------------------|
|                             | Surveys    | Sample         | RE Pooled Prevalence | Lower 95% CI | Upper 95% CI | Before 1990 vs. 1990–1999 | Before 1990 vs. 2000–2009 | Before 1990 vs. 2010–2019 |
| <b>Africa</b>               | <b>175</b> | <b>251,606</b> |                      |              |              |                           |                           |                           |
| <b>Eastern Africa</b>       | <b>51</b>  | <b>24,976</b>  |                      |              |              |                           |                           |                           |
| Ethiopia                    | 34         | 11,151         | 5.57%                | 4.68%        | 6.45%        | 0.893                     | <0.001                    | <0.001                    |
| Kenya                       | 1          | 287            | 3.83%                | 1.61%        | 6.05%        | —                         | 0.315                     | 0.252                     |
| Somalia                     | 5          | 6,047          | 7.07%                | 2.08%        | 12.06%       | 0.017                     | 0.354                     | 0.163                     |
| Uganda                      | 5          | 1,749          | 10.69%               | 4.39%        | 16.99%       | 0.563                     | 0.422                     | 0.472                     |
| Eritrea                     | 4          | 4,994          | 6.17%                | 1.96%        | 10.39%       | —                         | —                         | —                         |
| Tanzania                    | 2          | 748            | 6.50%                | 4.49%        | 8.51%        | 0.340                     | 0.411                     | 0.839                     |
| Zimbabwe                    | 0          | 0              | —                    | —            | —            | 0.665                     | 0.003                     | —                         |
| Eastern Africa, other/n.s.  | —          | —              | NA                   | NA           | NA           | NA                        | NA                        | NA                        |
| <b>Middle Africa</b>        | <b>26</b>  | <b>48,440</b>  |                      |              |              |                           |                           |                           |
| Cameroon                    | 26         | 48,440         | 7.82%                | 5.54%        | 10.10%       | 0.011                     | 0.890                     | 0.016                     |
| Middle Africa, other/n.s.   | —          | —              | NA                   | NA           | NA           | NA                        | NA                        | NA                        |
| <b>Northern Africa</b>      | <b>21</b>  | <b>114,182</b> |                      |              |              |                           |                           |                           |
| Egypt                       | 13         | 109,192        | 2.60%                | 1.57%        | 3.64%        | <0.001                    | 0.491                     | <0.001                    |
| Morocco                     | 2          | 1,517          | 1.78%                | 0.65%        | 2.91%        | <0.001                    | 0.001                     | 0.006                     |
| Sudan                       | 6          | 3,473          | 7.15%                | 4.63%        | 9.68%        | <0.001                    | <0.001                    | <0.001                    |
| Algeria                     | 0          | 0              | —                    | —            | —            | 0.001                     | —                         | —                         |
| Northern Africa, other/n.s. | —          | —              | NA                   | NA           | NA           | NA                        | NA                        | NA                        |
| <b>Southern Africa</b>      | <b>5</b>   | <b>12,863</b>  |                      |              |              |                           |                           |                           |
| South Africa                | 5          | 12,863         | 3.30%                | 1.52%        | 5.09%        | 0.449                     | 0.370                     | 0.016                     |
| Southern Africa, other/n.s. | —          | —              | NA                   | NA           | NA           | NA                        | NA                        | NA                        |
| <b>Western Africa</b>       | <b>72</b>  | <b>51,145</b>  |                      |              |              |                           |                           |                           |
| Nigeria                     | 49         | 21,273         | 7.50%                | 6.45%        | 8.54%        | 0.004                     | 0.356                     | 0.009                     |
| Ghana                       | 12         | 8,445          | 6.85%                | 4.54%        | 9.16%        | —                         | —                         | —                         |
| Liberia                     | 0          | 0              | —                    | —            | —            | 0.464                     | 0.152                     | —                         |
| Cape Verde                  | 0          | 0              | —                    | —            | —            | —                         | —                         | —                         |
| Sierra Leone                | 7          | 17,860         | 13.68%               | 11.23%       | 16.13%       | —                         | —                         | —                         |
| Senegal                     | 4          | 3,567          | 11.75%               | 7.13%        | 16.38%       | 0.647                     | 0.709                     | 0.989                     |
| Guinea                      | 0          | 0              | —                    | —            | —            | 0.102                     | 0.004                     | —                         |
| Western Africa, other/n.s.  | —          | —              | NA                   | NA           | NA           | NA                        | NA                        | NA                        |
| <b>Africa, n.s.</b>         | <b>—</b>   | <b>—</b>       | <b>NA</b>            | <b>NA</b>    | <b>NA</b>    | <b>NA</b>                 | <b>NA</b>                 | <b>NA</b>                 |

Appendix Table A7b—Continued

| Country/Region                 | 2000–2019 |               |                      |              |              | Subgroup P-value          |                           |                           |
|--------------------------------|-----------|---------------|----------------------|--------------|--------------|---------------------------|---------------------------|---------------------------|
|                                | Surveys   | Sample        | RE Pooled Prevalence | Lower 95% CI | Upper 95% CI | Before 1990 vs. 1990–1999 | Before 1990 vs. 2000–2009 | Before 1990 vs. 2010–2019 |
| <b>Europe</b>                  | <b>26</b> | <b>87,744</b> |                      |              |              |                           |                           |                           |
| <b>Eastern Europe</b>          | <b>26</b> | <b>87,744</b> |                      |              |              |                           |                           |                           |
| Poland                         | 4         | 5,205         | 0.99%†               | 0.72%        | 1.26%        | 0.058                     | 0.134                     | 0.023                     |
| Russia                         | 4         | 1,863         | 1.52%                | 0.78%        | 2.26%        | 0.789                     | 0.486                     | 0.037                     |
| Ukraine                        | 2         | 25,360        | 0.77%                | 0.66%        | 0.87%        | —                         | —                         | —                         |
| Romania                        | 5         | 42,782        | 4.70%                | 4.20%        | 5.20%        | 0.963                     | 0.011                     | 0.005                     |
| Yugoslavia                     | 0         | 0             | —                    | —            | —            | 0.881                     | 0.504                     | —                         |
| Bosnia and Herzegovina         | 1         | 397           | 2.27%                | 0.80%        | 3.73%        | —                         | —                         | —                         |
| Hungary                        | 0         | 0             | —                    | —            | —            | —                         | 0.002                     | —                         |
| Albania                        | 2         | 4,898         | 6.48%†               | 5.79%        | 7.17%        | —                         | —                         | —                         |
| Czech Republic & Slovakia      | 3         | 1,232         | 4.78%                | 1.36%        | 8.20%        | 0.498                     | 0.586                     | 0.023                     |
| Belarus                        | 1         | 198           | 2.02%                | 0.06%        | 3.98%        | 0.393                     | 0.973                     | 0.296                     |
| Bulgaria                       | 2         | 3,365         | 3.42%                | 0.93%        | 5.91%        | 0.124                     | <0.001                    | 0.715                     |
| Moldova                        | 0         | 0             | —                    | —            | —            | 0.360                     | 0.879                     | —                         |
| Croatia                        | 1         | 2,009         | 0.75%                | 0.37%        | 1.12%        | —                         | —                         | —                         |
| Former USSR                    | 0         | 0             | —                    | —            | —            | 0.167                     | —                         | —                         |
| Lithuania                      | 0         | 0             | —                    | —            | —            | —                         | —                         | —                         |
| Latvia                         | 0         | 0             | —                    | —            | —            | —                         | —                         | —                         |
| Macedonia                      | 1         | 435           | 5.75%                | 3.56%        | 7.93%        | —                         | —                         | —                         |
| Eastern Europe, other/n.s.     | —         | —             | NA                   | NA           | NA           | NA                        | NA                        | NA                        |
| <b>Southern Europe</b>         | <b>0</b>  | <b>0</b>      |                      |              |              |                           |                           |                           |
| Italy                          | —         | —             | NA                   | NA           | NA           | NA                        | NA                        | NA                        |
| Portugal                       | —         | —             | NA                   | NA           | NA           | NA                        | NA                        | NA                        |
| Greece                         | —         | —             | NA                   | NA           | NA           | NA                        | NA                        | NA                        |
| Spain                          | —         | —             | NA                   | NA           | NA           | NA                        | NA                        | NA                        |
| <b>Northern/Western Europe</b> | <b>0</b>  | <b>0</b>      |                      |              |              |                           |                           |                           |
| United Kingdom                 | —         | —             | NA                   | NA           | NA           | NA                        | NA                        | NA                        |
| Germany                        | —         | —             | NA                   | NA           | NA           | NA                        | NA                        | NA                        |
| France                         | —         | —             | NA                   | NA           | NA           | NA                        | NA                        | NA                        |
| Ireland                        | —         | —             | NA                   | NA           | NA           | NA                        | NA                        | NA                        |
| Netherlands                    | —         | —             | NA                   | NA           | NA           | NA                        | NA                        | NA                        |
| No./West Europe, other/n.s.    | —         | —             | NA                   | NA           | NA           | NA                        | NA                        | NA                        |
| <b>Europe, other/n.s.</b>      | <b>—</b>  | <b>—</b>      | <b>NA</b>            | <b>NA</b>    | <b>NA</b>    | <b>NA</b>                 | <b>NA</b>                 | <b>NA</b>                 |

Abbreviations: CHB, chronic hepatitis B; CI, confidence interval; FB, foreign-born; n.s., not specified; RE, random effects

Subgroup P-values are for Z-test comparing RE pooled prevalence for surveys conducted in each decade (15)

Meta-regression analyses (done for countries with 25 or more surveys) used a RE model (method of moments) using the date of survey as a covariate (Comprehensive Meta-Analysis, Version 2, Biostat, Inc., Englewood, New Jersey)

If only one study is available, rate is as reported with 95% CIs from standard error.

†Random effects rate cannot be calculated because  $\tau^2 < 0$ ; fixed effect rate is shown.

Rates have been rounded to two decimal places.

Northern America = FB from Canada and Bermuda living in the U.S.

For Japan, northern America, Australia, New Zealand, and southern, northern, and western Europe, which have low CHB rates and relatively modest numbers of emigrants to the U.S., rates from reviews were used instead of rates from systematic review and meta-analyses. Male-specific data and female-specific data from the same survey are entered separately and counted as two surveys.

Appendix Table A8. Sex-Specific CHB Pooled Prevalence Rates by Country

| Country/Region              | Male-Specific Rates |                   |                      |              |              | Female-Specific Rates |                   |                      |              |              | P-value   | Rate Comparison |
|-----------------------------|---------------------|-------------------|----------------------|--------------|--------------|-----------------------|-------------------|----------------------|--------------|--------------|-----------|-----------------|
|                             | Number of Surveys   | Sample Number     | RE Pooled Prevalence | Lower 95% CI | Upper 95% CI | Number of Surveys     | Sample Number     | RE Pooled Prevalence | Lower 95% CI | Upper 95% CI |           |                 |
| <b>Asia</b>                 | <b>385</b>          | <b>25,313,414</b> |                      |              |              | <b>652</b>            | <b>59,214,028</b> |                      |              |              |           |                 |
| <b>Eastern Asia</b>         | <b>179</b>          | <b>24,625,032</b> |                      |              |              | <b>266.00</b>         | <b>57,802,379</b> |                      |              |              |           |                 |
| China (including Hong Kong) | 81                  | 20,889,261        | 9.71%                | 9.32%        | 10.09%       | 141                   | 42,906,718        | 7.07%                | 6.88%        | 7.27%        | <0.001    | males higher    |
| Taiwan                      | 58                  | 316,103           | 15.43%               | 13.68%       | 17.17%       | 80                    | 14,282,806        | 11.39%               | 10.59%       | 12.19%       | <0.001    | males higher    |
| Korea                       | 40                  | 3,419,668         | 5.40%                | 4.82%        | 5.97%        | 45                    | 612,855           | 4.25%                | 3.83%        | 4.67%        | 0.002     | males higher    |
| Japan                       | —                   | —                 | NA                   | NA           | NA           | —                     | —                 | NA                   | NA           | NA           | NA        | NA              |
| Eastern Asia, other/n.s.    | —                   | —                 | NA                   | NA           | NA           | —                     | —                 | NA                   | NA           | NA           | NA        | NA              |
| <b>South Eastern Asia</b>   | <b>59</b>           | <b>84,459</b>     |                      |              |              | <b>131</b>            | <b>393,109</b>    |                      |              |              |           |                 |
| Philippines                 | 3                   | 31,714            | 10.92%               | 1.75%        | 20.09%       | 13                    | 82,164            | 5.43%                | 4.35%        | 6.51%        | 0.244     | n.s.            |
| Vietnam                     | 15                  | 13,196            | 15.93%               | 14.26%       | 17.60%       | 28                    | 47,600            | 9.42%                | 8.65%        | 10.19%       | <0.001    | males higher    |
| Thailand                    | 16                  | 13,709            | 9.22%                | 6.78%        | 11.65%       | 24                    | 66,702            | 5.32%                | 4.45%        | 6.19%        | 0.003     | males higher    |
| Laos                        | 2                   | 329               | 16.69%†              | 12.66%       | 20.72%       | 20                    | 22,692            | 6.17%                | 5.21%        | 7.12%        | <0.001    | males higher    |
| Cambodia                    | 4                   | 1,167             | 7.54%                | 4.11%        | 10.98%       | 10                    | 8,276             | 6.09%                | 4.16%        | 8.02%        | 0.470     | n.s.            |
| Indonesia                   | 3                   | 754               | 10.18%               | 2.61%        | 17.74%       | 16                    | 20,397            | 3.58%                | 2.88%        | 4.28%        | 0.089     | n.s.            |
| Myanmar                     | 0                   | 0                 | —                    | —            | —            | 3                     | 7,993             | 6.94%                | 5.15%        | 8.74%        | —         | —               |
| Malaysia                    | 3                   | 1,077             | 10.02%               | 4.46%        | 15.58%       | 8                     | 60,269            | 3.00%                | 2.03%        | 3.97%        | 0.015     | males higher    |
| Singapore                   | 13                  | 22,513            | 8.28%                | 6.32%        | 10.23%       | 9                     | 77,016            | 3.43%                | 3.14%        | 3.73%        | <0.001    | males higher    |
| <b>South Central Asia</b>   | <b>88</b>           | <b>287,196</b>    |                      |              |              | <b>141</b>            | <b>508,061</b>    |                      |              |              |           |                 |
| India                       | 22                  | 99,828            | 3.11%                | 2.58%        | 3.63%        | 56                    | 276,418           | 2.23%                | 1.97%        | 2.48%        | 0.003     | Males Higher    |
| Iran                        | 21                  | 64,214            | 2.99%                | 1.79%        | 4.19%        | 24                    | 92,825            | 1.95%                | 1.28%        | 2.62%        | 0.138     | n.s.            |
| Pakistan                    | 20                  | 68,509            | 4.71%                | 3.40%        | 6.02%        | 31                    | 83,093            | 3.13%                | 2.60%        | 3.67%        | 0.029     | Males Higher    |
| Bangladesh                  | 8                   | 47,532            | 5.75%                | 4.46%        | 7.04%        | 13                    | 15,289            | 2.88%                | 2.04%        | 3.71%        | <0.001    | Males Higher    |
| Afghanistan                 | 2                   | 524               | 9.92%                | 5.33%        | 14.50%       | 5                     | 8,911             | 2.22%                | 1.41%        | 3.03%        | 0.001     | Males Higher    |
| Uzbekistan                  | 0                   | 0                 | —                    | —            | —            | 3                     | 8,220             | 5.92%                | 4.48%        | 7.36%        | —         | —               |
| Nepal                       | 13                  | 5,468             | 3.07%                | 1.99%        | 4.15%        | 7                     | 22,223            | 0.86%                | 0.35%        | 1.37%        | <0.001    | males higher    |
| Sri Lanka                   | 1                   | 987               | 4.05%                | 2.82%        | 5.28%        | 1                     | 926               | 0.86%                | 0.27%        | 1.45%        | <0.001    | males higher    |
| Kazakhstan                  | 1                   | 134               | 3.70%                | 0.50%        | 6.90%        | 1                     | 156               | 3.80%                | 0.80%        | 6.80%        | 0.960     | n.s.            |
| So Cen Asia, other/n.s.     | —                   | —                 | NA                   | NA           | NA           | —                     | —                 | NA                   | NA           | NA           | NA        | NA              |
| <b>Western Asia</b>         | <b>59</b>           | <b>316,727</b>    |                      |              |              | <b>114</b>            | <b>510,479</b>    |                      |              |              |           |                 |
| Iraq                        | 1                   | 69,658            | 2.32%                | 2.21%        | 2.43%        | 0                     | 0                 | —                    | —            | —            | —         | —               |
| Israel                      | 5                   | 27,853            | 0.88%                | 0.58%        | 1.19%        | 9                     | 65,179            | 0.75%                | 0.54%        | 0.95%        | 0.473     | n.s.            |
| Lebanon                     | 2                   | 17,938            | 1.71%                | 1.46%        | 1.96%        | 6                     | 38,691            | 1.43%                | 0.90%        | 1.96%        | 0.346     | n.s.            |
| Turkey                      | 24                  | 169,141           | 5.38%                | 4.87%        | 5.88%        | 50                    | 316,232           | 3.37%                | 2.90%        | 3.83%        | <0.001    | males higher    |
| Armenia                     | 0                   | 0                 | —                    | —            | —            | 2                     | 15,245            | 0.34%                | 0.05%        | 0.63%        | —         | —               |
| Syria                       | 0                   | 0                 | —                    | —            | —            | 3                     | 13,171            | 1.25%                | 0.82%        | 1.67%        | —         | —               |
| Jordan                      | 2                   | 261               | 5.91%                | 1.40%        | 10.43%       | 3                     | 1,172             | 3.25%                | 0.91%        | 5.59%        | 0.304     | n.s.            |
| Saudi Arabia                | 21                  | 29,320            | 7.66%                | 6.17%        | 9.15%        | 30                    | 52,847            | 3.74%                | 3.08%        | 4.39%        | <0.001    | males higher    |
| Yemen                       | 3                   | 2,241             | 4.15%                | 3.34%        | 4.96%        | 6                     | 2,418             | 10.04%               | 5.69%        | 14.39%       | 0.009     | females higher  |
| Kuwait                      | 0                   | 0                 | —                    | —            | —            | 2                     | 3,011             | 1.59%                | -0.91%       | 4.10%        | —         | —               |
| Azerbaijan                  | 1                   | 315               | 3.81%                | 1.70%        | 5.92%        | 2                     | 2,013             | 2.46%                | 0.90%        | 4.02%        | 0.314     | n.s.            |
| Georgia                     | 0                   | 0                 | —                    | —            | —            | 1                     | 500               | 5.20%                | 3.25%        | 7.15%        | —         | —               |
| Western Asia, other/n.s.    | —                   | —                 | NA                   | NA           | NA           | —                     | —                 | NA                   | NA           | NA           | NA        | NA              |
| <b>Asia, not specified</b>  | <b>—</b>            | <b>—</b>          | <b>NA</b>            | <b>NA</b>    | <b>NA</b>    | <b>—</b>              | <b>—</b>          | <b>NA</b>            | <b>NA</b>    | <b>NA</b>    | <b>NA</b> | <b>NA</b>       |

Appendix Table A8—Continued

| Country/Region                 | Male-Specific Rates |               |                      |              |              | Female-Specific Rates |                |                      |              |              | P-value   | Rate Comparison |
|--------------------------------|---------------------|---------------|----------------------|--------------|--------------|-----------------------|----------------|----------------------|--------------|--------------|-----------|-----------------|
|                                | Number of Surveys   | Sample Number | RE Pooled Prevalence | Lower 95% CI | Upper 95% CI | Number of Surveys     | Sample Number  | RE Pooled Prevalence | Lower 95% CI | Upper 95% CI |           |                 |
| <b>Americas</b>                | <b>35</b>           | <b>55,498</b> |                      |              |              | <b>97</b>             | <b>302,422</b> |                      |              |              |           |                 |
| <b>Central America</b>         | <b>3</b>            | <b>4,560</b>  |                      |              |              | <b>20</b>             | <b>72,967</b>  |                      |              |              |           |                 |
| Mexico                         | 2                   | 4,176         | 0.13%†               | 0.02%        | 0.23%        | 12                    | 27,964         | 0.60%                | 0.38%        | 0.83%        | <0.001    | females higher  |
| El Salvador                    | 0                   | 0             | —                    | —            | —            | 1                     | 126            | 1.59%                | -0.60%       | 3.77%        | —         | —               |
| Guatemala                      | 0                   | 0             | —                    | —            | —            | 3                     | 42,660         | 0.18%                | 0.14%        | 0.22%        | —         | —               |
| Honduras                       | 0                   | 0             | —                    | —            | —            | 0                     | 0              | —                    | —            | —            | —         | —               |
| Nicaragua                      | 0                   | 0             | —                    | —            | —            | 1                     | 1,180          | 0.30%                | -0.01%       | 0.61%        | —         | —               |
| Panama                         | 1                   | 384           | 1.40%                | 0.22%        | 2.58%        | 1                     | 316            | 1.30%                | 0.05%        | 2.55%        | 0.909     | n.s.            |
| Costa Rica                     | 0                   | 0             | —                    | —            | —            | 1                     | 179            | 0.58%                | -0.53%       | 1.69%        | —         | —               |
| Belize                         | 0                   | 0             | —                    | —            | —            | 1                     | 542            | 0.20%                | -0.18%       | 0.58%        | —         | —               |
| <b>Caribbean</b>               | <b>2</b>            | <b>278</b>    |                      |              |              | <b>16</b>             | <b>63,551</b>  |                      |              |              |           |                 |
| Cuba                           | 0                   | 0             | —                    | —            | —            | 1                     | 550            | 0.40%                | -0.13%       | 0.93%        | —         | —               |
| Dominican Republic             | 0                   | 0             | —                    | —            | —            | 4                     | 615            | 6.92%                | 4.04%        | 9.80%        | —         | —               |
| Jamaica                        | 0                   | 0             | —                    | —            | —            | 0                     | 0              | —                    | —            | —            | —         | —               |
| Haiti                          | 2                   | 278           | 13.51%†              | 9.49%        | 17.52%       | 11                    | 62,386         | 3.70%                | 2.18%        | 5.23%        | <0.001    | males higher    |
| Trinidad and Tobago            | 0                   | 0             | —                    | —            | —            | 0                     | 0              | —                    | —            | —            | —         | —               |
| Barbados                       | 0                   | 0             | —                    | —            | —            | 0                     | 0              | —                    | —            | —            | —         | —               |
| Caribbean, other/n.s.          | —                   | —             | NA                   | NA           | NA           | —                     | —              | NA                   | NA           | NA           | NA        | NA              |
| <b>South America</b>           | <b>30</b>           | <b>50,660</b> |                      |              |              | <b>61</b>             | <b>165,904</b> |                      |              |              |           |                 |
| Colombia                       | 0                   | 0             | —                    | —            | —            | 0                     | 0              | —                    | —            | —            | —         | —               |
| Ecuador                        | 0                   | 0             | —                    | —            | —            | 0                     | 0              | —                    | —            | —            | —         | —               |
| Peru                           | 10                  | 2,675         | 2.31%                | 1.21%        | 3.41%        | 10                    | 4,704          | 1.39%                | 0.67%        | 2.10%        | 0.168     | n.s.            |
| Brazil                         | 16                  | 46,374        | 2.72%                | 1.77%        | 3.67%        | 39                    | 152,245        | 0.81%                | 0.67%        | 0.94%        | <0.001    | males higher    |
| Guyana                         | 0                   | 0             | —                    | —            | —            | 0                     | 0              | —                    | —            | —            | —         | —               |
| Argentina                      | 2                   | 1,177         | 1.48%                | 0.21%        | 2.75%        | 4                     | 6,411          | 0.38%                | 0.06%        | 0.71%        | 0.100     | n.s.            |
| Venezuela                      | 1                   | 205           | 2.40%                | 0.30%        | 4.50%        | 5                     | 1,267          | 2.89%                | 0.82%        | 4.95%        | 0.745     | n.s.            |
| Chile                          | 1                   | 229           | 0.90%                | -0.32%       | 2.12%        | 3                     | 1,277          | 0.37%                | 0.04%        | 0.71%        | 0.149     | n.s.            |
| Bolivia                        | 0                   | 0             | —                    | —            | —            | 0                     | 0              | —                    | —            | —            | —         | —               |
| Uruguay                        | 0                   | 0             | —                    | —            | —            | 0                     | 0              | —                    | —            | —            | —         | —               |
| Paraguay                       | 0                   | 0             | —                    | —            | —            | 0                     | 0              | —                    | —            | —            | —         | —               |
| South America, other/n.s.      | —                   | —             | NA                   | NA           | NA           | —                     | —              | NA                   | NA           | NA           | NA        | NA              |
| <b>Northern America</b>        | <b>0</b>            | <b>0</b>      |                      |              |              | <b>0</b>              | <b>0</b>       |                      |              |              |           |                 |
| Canada                         | —                   | —             | NA                   | NA           | NA           | —                     | —              | NA                   | NA           | NA           | NA        | NA              |
| Northern America, other/n.s.   | —                   | —             | NA                   | NA           | NA           | —                     | —              | NA                   | NA           | NA           | NA        | NA              |
| <b>Americas, not specified</b> | <b>—</b>            | <b>—</b>      | <b>NA</b>            | <b>NA</b>    | <b>NA</b>    | <b>—</b>              | <b>—</b>       | <b>NA</b>            | <b>NA</b>    | <b>NA</b>    | <b>NA</b> | <b>NA</b>       |
| <b>Oceania</b>                 | <b>8</b>            | <b>3,818</b>  |                      |              |              | <b>24</b>             | <b>36,707</b>  |                      |              |              |           |                 |
| Australia                      | —                   | —             | NA                   | NA           | NA           | —                     | —              | NA                   | NA           | NA           | NA        | NA              |
| New Zealand                    | —                   | —             | NA                   | NA           | NA           | —                     | —              | NA                   | NA           | NA           | NA        | NA              |
| Fiji                           | 1                   | 310           | 2.26%                | 0.60%        | 3.91%        | 5                     | 24,464         | 3.78%                | 1.31%        | 6.24%        | 0.316     | n.s.            |
| Tonga                          | 1                   | 207           | 23.00%               | 17.27%       | 28.73%       | 5                     | 3,581          | 13.93%               | 9.87%        | 18.00%       | 0.011     | males higher    |
| Micronesia                     | 4                   | 3,102         | 23.84%               | 17.47%       | 30.22%       | 9                     | 4,134          | 12.93%               | 9.04%        | 16.83%       | 0.004     | males higher    |
| Samoa                          | 2                   | 199           | 7.95%†               | 4.20%        | 11.71%       | 5                     | 4,528          | 3.16%†               | 2.65%        | 3.67%        | 0.013     | males higher    |
| Oceania, not specified         | —                   | —             | NA                   | NA           | NA           | —                     | —              | NA                   | NA           | NA           | NA        | NA              |

Appendix Table A8—Continued

| Country/Region               | Male-Specific Rates |                |                      |              |              | Female-Specific Rates |                |                      |              |              | P-value   | Rate Comparison |
|------------------------------|---------------------|----------------|----------------------|--------------|--------------|-----------------------|----------------|----------------------|--------------|--------------|-----------|-----------------|
|                              | Number of Surveys   | Sample Number  | RE Pooled Prevalence | Lower 95% CI | Upper 95% CI | Number of Surveys     | Sample Number  | RE Pooled Prevalence | Lower 95% CI | Upper 95% CI |           |                 |
| <b>Africa</b>                | <b>107</b>          | <b>230,938</b> |                      |              |              | <b>259</b>            | <b>250,561</b> |                      |              |              |           |                 |
| <b>Eastern Africa</b>        | <b>40</b>           | <b>29,068</b>  |                      |              |              | <b>85</b>             | <b>38,500</b>  |                      |              |              |           |                 |
| Ethiopia                     | 11                  | 14,677         | 8.31%                | 6.39%        | 10.23%       | 37                    | 13,607         | 5.48%                | 4.74%        | 6.22%        | 0.007     | males higher    |
| Kenya                        | 11                  | 4,750          | 6.45%                | 4.14%        | 8.75%        | 13                    | 8,813          | 5.00%                | 3.13%        | 6.88%        | 0.341     | n.s.            |
| Somalia                      | 2                   | 321            | 8.63%                | -1.42%       | 18.67%       | 5                     | 1,465          | 7.00%                | 3.12%        | 10.88%       | 0.767     | n.s.            |
| Uganda                       | 6                   | 3,803          | 11.81%               | 8.32%        | 15.30%       | 7                     | 4,912          | 9.66%                | 7.09%        | 12.22%       | 0.330     | n.s.            |
| Eritrea                      | 0                   | 0              | —                    | —            | —            | 0                     | 0              | —                    | —            | —            | —         | —               |
| Tanzania                     | 2                   | 463            | 5.29%†               | 3.25%        | 7.33%        | 9                     | 3,322          | 6.49%                | 4.79%        | 8.18%        | 0.375     | n.s.            |
| Zimbabwe                     | 8                   | 5,054          | 16.50%               | 10.48%       | 22.52%       | 14                    | 6,381          | 10.40%               | 6.11%        | 14.69%       | 0.106     | n.s.            |
| Eastern Africa, other/n.s.   | —                   | —              | NA                   | NA           | NA           | —                     | —              | NA                   | NA           | NA           | NA        | NA              |
| <b>Middle Africa</b>         | <b>5</b>            | <b>5,227</b>   |                      |              |              | <b>26</b>             | <b>30,431</b>  |                      |              |              |           |                 |
| Cameroon                     | 5                   | 5,227          | 13.43%               | 9.20%        | 17.67%       | 26                    | 30,431         | 8.56%                | 5.95%        | 11.18%       | 0.06      | n.s.            |
| Middle Africa, other/n.s.    | —                   | —              | NA                   | NA           | NA           | —                     | —              | NA                   | NA           | NA           | NA        | NA              |
| <b>Northern Africa</b>       | <b>25</b>           | <b>82,798</b>  |                      |              |              | <b>34</b>             | <b>90,380</b>  |                      |              |              |           |                 |
| Egypt                        | 14                  | 54,204         | 5.72%                | 4.26%        | 7.18%        | 18                    | 61,004         | 4.63%                | 3.79%        | 5.48%        | 0.207     | n.s.            |
| Morocco                      | 4                   | 26,096         | 2.26%                | 1.81%        | 2.70%        | 4                     | 23,291         | 1.27%                | 0.86%        | 1.67%        | 0.001     | males higher    |
| Sudan                        | 6                   | 2,447          | 23.52%               | 19.29%       | 27.75%       | 10                    | 5,244          | 10.67%               | 7.68%        | 13.66%       | <0.001    | males higher    |
| Algeria                      | 1                   | 51             | 11.80%               | 2.95%        | 20.65%       | 2                     | 841            | 4.33%                | -1.82%       | 10.48%       | 0.174     | n.s.            |
| Northern Africa, other/n.s.  | —                   | —              | NA                   | NA           | NA           | —                     | —              | NA                   | NA           | NA           | NA        | NA              |
| <b>Southern Africa</b>       | <b>7</b>            | <b>69,612</b>  |                      |              |              | <b>20</b>             | <b>33,501</b>  |                      |              |              |           |                 |
| South Africa                 | 7                   | 69,612         | 7.92%                | 5.54%        | 10.29%       | 20                    | 33,501         | 3.68%                | 2.79%        | 4.57%        | 0.001     | males higher    |
| Southern Africa, other/n.s.  | —                   | —              | NA                   | NA           | NA           | —                     | —              | NA                   | NA           | NA           | NA        | NA              |
| <b>Western Africa</b>        | <b>30</b>           | <b>44,233</b>  |                      |              |              | <b>94</b>             | <b>57,749</b>  |                      |              |              |           |                 |
| Nigeria                      | 15                  | 6,783          | 11.26%               | 9.08%        | 13.44%       | 59                    | 34,777         | 7.72%                | 6.53%        | 8.92%        | 0.005     | males higher    |
| Ghana                        | 2                   | 471            | 16.48%               | 10.90%       | 22.06%       | 19                    | 11,689         | 9.85%                | 7.80%        | 11.90%       | 0.029     | males higher    |
| Liberia                      | 0                   | 0              | —                    | —            | —            | 1                     | 436            | 7.57%                | 5.09%        | 10.05%       | —         | —               |
| Cape Verde                   | 1                   | 89             | 8.99%                | 3.05%        | 14.93%       | 1                     | 90             | 3.30%                | -0.39%       | 6.99%        | 0.110     | n.s.            |
| Sierra Leone                 | 3                   | 13,822         | 15.55%               | 8.34%        | 22.75%       | 6                     | 4,554          | 10.03%               | 7.65%        | 12.40%       | 0.154     | n.s.            |
| Senegal                      | 7                   | 22,096         | 14.59%               | 10.84%       | 18.34%       | 7                     | 5,913          | 10.51%               | 8.70%        | 12.33%       | 0.055     | n.s.            |
| Guinea                       | 2                   | 972            | 15.80%†              | 13.51%       | 18.09%       | 1                     | 290            | 14.10%               | 10.09%       | 18.11%       | 0.470     | n.s.            |
| Western Africa, other/ n.s.  | —                   | —              | NA                   | NA           | NA           | —                     | —              | NA                   | NA           | NA           | NA        | NA              |
| <b>Africa, not specified</b> | <b>—</b>            | <b>—</b>       | <b>NA</b>            | <b>NA</b>    | <b>NA</b>    | <b>—</b>              | <b>—</b>       | <b>NA</b>            | <b>NA</b>    | <b>NA</b>    | <b>NA</b> | <b>NA</b>       |

Appendix Table A8—Continued

| Country/Region                     | Male-Specific Rates |               |                      |              |              | Female-Specific Rates |                |                      |              |              | P-value   | Rate Comparison |
|------------------------------------|---------------------|---------------|----------------------|--------------|--------------|-----------------------|----------------|----------------------|--------------|--------------|-----------|-----------------|
|                                    | Number of Surveys   | Sample Number | RE Pooled Prevalence | Lower 95% CI | Upper 95% CI | Number of Surveys     | Sample Number  | RE Pooled Prevalence | Lower 95% CI | Upper 95% CI |           |                 |
| <b>Europe</b>                      | <b>19</b>           | <b>37,943</b> |                      |              |              | <b>54</b>             | <b>515,645</b> |                      |              |              |           |                 |
| <b>Eastern Europe</b>              | <b>19</b>           | <b>37,943</b> |                      |              |              | <b>54</b>             | <b>515,645</b> |                      |              |              |           |                 |
| Poland                             | 2                   | 2,465         | 1.46%                | 0.55%        | 2.37%        | 5                     | 20,237         | 1.15%                | 0.79%        | 1.51%        | 0.541     | n.s.            |
| Russia                             | 4                   | 15,342        | 2.50%                | 1.25%        | 3.75%        | 8                     | 275,644        | 2.85%                | 1.76%        | 3.95%        | 0.676     | n.s.            |
| Ukraine                            | 0                   | 0             | —                    | —            | —            | 1                     | 23,065         | 0.72%                | 0.61%        | 0.83%        | —         | —               |
| Romania                            | 3                   | 7,128         | 7.52%                | 5.01%        | 10.02%       | 9                     | 16,714         | 6.26%                | 4.79%        | 7.72%        | 0.393     | n.s.            |
| Yugoslavia                         | 0                   | 0             | —                    | —            | —            | 1                     | 63             | 4.76%                | -0.50%       | 10.02%       | —         | —               |
| Bosnia and Herzegovina             | 1                   | 6,963         | 0.95%                | 0.72%        | 1.18%        | 1                     | 1,263          | 0.63%                | 0.20%        | 1.07%        | 0.211     | n.s.            |
| Hungary                            | 0                   | 0             | —                    | —            | —            | 1                     | 33,434         | 0.51%                | 0.43%        | 0.58%        | —         | —               |
| Albania                            | 5                   | 2,107         | 14.65%               | 11.43%       | 17.86%       | 10                    | 8,931          | 9.18%                | 6.89%        | 11.47%       | 0.007     | males higher    |
| Czech Republic & Slovakia          | 1                   | 472           | 1.20%                | 0.22%        | 2.18%        | 6                     | 31,453         | 1.06%                | 0.31%        | 1.82%        | 0.831     | n.s.            |
| Belarus                            | 0                   | 0             | —                    | —            | —            | 0                     | 0              | —                    | —            | —            | —         | —               |
| Bulgaria                           | 0                   | 0             | —                    | —            | —            | 5                     | 46,199         | 2.70%                | 1.88%        | 3.52%        | —         | —               |
| Moldova                            | 0                   | 0             | —                    | —            | —            | 1                     | 1,098          | 9.70%                | 7.95%        | 11.45%       | —         | —               |
| Croatia                            | 1                   | 1,130         | 1.95%                | 1.14%        | 2.76%        | 4                     | 55,135         | 1.37%                | 0.66%        | 2.07%        | 0.287     | n.s.            |
| Former USSR                        | 1                   | 506           | 5.30%                | 3.35%        | 7.25%        | 2                     | 2,409          | 3.95%                | 1.39%        | 6.50%        | 0.410     | n.s.            |
| Lithuania                          | 1                   | 1,830         | 1.97%                | 1.33%        | 2.61%        | 0                     | 0              | —                    | —            | —            | —         | —               |
| Latvia                             | 0                   | 0             | —                    | —            | —            | 0                     | 0              | —                    | —            | —            | —         | —               |
| Macedonia                          | 0                   | 0             | —                    | —            | —            | 0                     | 0              | —                    | —            | —            | —         | —               |
| Eastern Europe, other/n.s.         | —                   | —             | NA                   | NA           | NA           | —                     | —              | NA                   | NA           | NA           | NA        | NA              |
| <b>Southern Europe</b>             | <b>0</b>            | <b>0</b>      |                      |              |              | <b>0</b>              | <b>0</b>       |                      |              |              |           |                 |
| Italy                              | —                   | —             | NA                   | NA           | NA           | —                     | —              | NA                   | NA           | NA           | NA        | NA              |
| Portugal                           | —                   | —             | NA                   | NA           | NA           | —                     | —              | NA                   | NA           | NA           | NA        | NA              |
| Greece                             | —                   | —             | NA                   | NA           | NA           | —                     | —              | NA                   | NA           | NA           | NA        | NA              |
| Spain                              | —                   | —             | NA                   | NA           | NA           | —                     | —              | NA                   | NA           | NA           | NA        | NA              |
| <b>Northern and Western Europe</b> | <b>0</b>            | <b>0</b>      |                      |              |              | <b>0</b>              | <b>0</b>       |                      |              |              |           |                 |
| United Kingdom                     | —                   | —             | NA                   | NA           | NA           | —                     | —              | NA                   | NA           | NA           | NA        | NA              |
| Germany                            | —                   | —             | NA                   | NA           | NA           | —                     | —              | NA                   | NA           | NA           | NA        | NA              |
| France                             | —                   | —             | NA                   | NA           | NA           | —                     | —              | NA                   | NA           | NA           | NA        | NA              |
| Ireland                            | —                   | —             | NA                   | NA           | NA           | —                     | —              | NA                   | NA           | NA           | NA        | NA              |
| Netherlands                        | —                   | —             | NA                   | NA           | NA           | —                     | —              | NA                   | NA           | NA           | NA        | NA              |
| No./West Europe, other/n.s.        | —                   | —             | NA                   | NA           | NA           | —                     | —              | NA                   | NA           | NA           | NA        | NA              |
| <b>Europe, not specified</b>       | <b>—</b>            | <b>—</b>      | <b>NA</b>            | <b>NA</b>    | <b>NA</b>    | <b>—</b>              | <b>—</b>       | <b>NA</b>            | <b>NA</b>    | <b>NA</b>    | <b>NA</b> | <b>NA</b>       |

Abbreviations: CHB, chronic hepatitis B; CI, confidence interval; n.s., not statistically significant; RE, random effects.

P-value is for a Z-test comparing male-specific and female-specific RE pooled prevalence rates (15).

Male-specific rates are from male-only surveys and both-sex surveys which include sex-specific data (i.e., sample number and rate for males and for females).

Female-specific rates are from female-only surveys and both-sex surveys which include sex-specific data.

If only one study is available, rate is as reported with 95% CIs from standard error.

†Random effects rate cannot be calculated because  $\tau^2 < 0$ ; fixed effect rate is shown.

Northern America = FB from Canada and Bermuda living in the U.S.

For Japan, northern America, Australia, New Zealand, and southern, northern, and western Europe, which have low CHB rates and relatively modest numbers of emigrants to the U.S., rates from reviews were used instead of rates from systematic review and meta-analyses. Male-specific data and female-specific data from the same survey are entered separately and counted as two surveys.



Appendix Table A9a. CHB Pooled Prevalence Rates and Prevalence of Foreign-Born with CHB Living in the U.S. in 2018 by Country of Origin and Decade of Arrival

| Country/Region | FB Living in the U.S., 2018 |             |            |            |            | CHB Prevalence Rate (%)  |              |              |                        |              |              |                        |              |              |                        |              |              |
|----------------|-----------------------------|-------------|------------|------------|------------|--------------------------|--------------|--------------|------------------------|--------------|--------------|------------------------|--------------|--------------|------------------------|--------------|--------------|
|                | Total FB                    | Entry       |            |            |            | Surveys Done before 1990 |              |              | Surveys Done 1990–1999 |              |              | Surveys Done 2000–2009 |              |              | Surveys Done 2010–2019 |              |              |
|                |                             | before 1990 | 1990–1999  | 2000–2009  | 2010–2019  | RE Pooled Rate           | Lower 95% CI | Upper 95% CI | RE Pooled Rate         | Lower 95% CI | Upper 95% CI | RE Pooled Rate         | Lower 95% CI | Upper 95% CI | RE Pooled Rate         | Lower 95% CI | Upper 95% CI |
| Asia           | 14,785,266                  | 4,256,429   | 2,799,162  | 3,371,832  | 4,357,843  | 8.44%                    | 7.11%        | 9.78%        | 7.09%                  | 5.63%        | 8.55%        | 5.28%                  | 4.43%        | 6.12%        | 3.79%                  | 2.99%        | 4.65%        |
| Americas       | 24,410,150                  | 7,514,243   | 5,628,412  | 6,558,933  | 4,708,562  | 2.64%                    | 0.82%        | 4.55%        | 1.13%                  | 0.42%        | 1.93%        | 1.02%                  | 0.69%        | 1.37%        | 1.08%                  | 0.56%        | 1.66%        |
| Oceania        | 297,510                     | 74,221      | 52,437     | 79,955     | 90,897     | 5.89%                    | 3.96%        | 7.82%        | 4.51%                  | 2.31%        | 6.71%        | 2.81%                  | 1.54%        | 4.07%        | 2.14%                  | 1.57%        | 2.70%        |
| Africa         | 2,575,550                   | 354,995     | 422,418    | 833,522    | 964,615    | 9.96%                    | 6.51%        | 13.40%       | 10.93%                 | 7.40%        | 14.47%       | 8.27%                  | 4.71%        | 11.83%       | 6.49%                  | 4.49%        | 8.48%        |
| Europe         | 5,894,567                   | 2,646,881   | 1,214,654  | 1,038,441  | 994,591    | 1.24%                    | 0.92%        | 1.57%        | 2.24%                  | 1.31%        | 3.19%        | 2.10%                  | 1.52%        | 2.71%        | 1.26%                  | 0.89%        | 1.64%        |
| All regions    | 47,963,043                  | 14,846,769  | 10,117,083 | 11,882,683 | 11,116,508 | 4.25%                    | 2.79%        | 5.75%        | 3.34%                  | 2.27%        | 4.46%        | 2.84%                  | 2.11%        | 3.59%        | 2.63%                  | 1.89%        | 3.43%        |

Appendix Table A9a—Continued

| Country/Region              | FB Living in the U.S., 2018 |                          |                  |                  |                  | CHB Prevalence Rate (%) |              |              |                        |              |              |                        |              |              |                |              |              |
|-----------------------------|-----------------------------|--------------------------|------------------|------------------|------------------|-------------------------|--------------|--------------|------------------------|--------------|--------------|------------------------|--------------|--------------|----------------|--------------|--------------|
|                             | Total FB                    | Surveys Done before 1990 |                  |                  |                  | Surveys Done 1990–1999  |              |              | Surveys Done 2000–2009 |              |              | Surveys Done 2010–2019 |              |              |                |              |              |
|                             |                             | Entry before 1990        | Entry 1990–1999  | Entry 2000–2009  | Entry 2010–2019  | RE Pooled Rate          | Lower 95% CI | Upper 95% CI | RE Pooled Rate         | Lower 95% CI | Upper 95% CI | RE Pooled Rate         | Lower 95% CI | Upper 95% CI | RE Pooled Rate | Lower 95% CI | Upper 95% CI |
| <b>Asia</b>                 | <b>14,785,266</b>           | <b>4,256,429</b>         | <b>2,799,162</b> | <b>3,371,832</b> | <b>4,357,843</b> |                         |              |              |                        |              |              |                        |              |              |                |              |              |
| <b>Eastern Asia</b>         | <b>4,639,824</b>            | <b>1,479,479</b>         | <b>887,767</b>   | <b>1,011,495</b> | <b>1,261,083</b> |                         |              |              |                        |              |              |                        |              |              |                |              |              |
| China (including Hong Kong) | 2,527,241                   | 544,416                  | 510,407          | 617,051          | 855,367          | 11.59%                  | 10.50%       | 12.68%       | 10.47%                 | 9.50%        | 11.43%       | 8.78%                  | 8.26%        | 9.30%        | 7.06%          | 6.85%        | 7.28%        |
| Taiwan                      | 404,329                     | 192,242                  | 80,485           | 65,199           | 66,403           | 14.71%                  | 14.33%       | 15.10%       | 15.53%                 | 14.62%       | 16.44%       | 10.21%                 | 9.29%        | 11.12%       | 10.60%         | 8.50%        | 12.70%       |
| Korea                       | 1,133,728                   | 496,965                  | 216,275          | 234,701          | 185,787          | 6.82%                   | 5.84%        | 7.79%        | 5.15%                  | 4.34%        | 5.95%        | 4.00%                  | 3.47%        | 4.53%        | 3.19%          | 2.55%        | 3.83%        |
| Japan                       | 560,538                     | 245,240                  | 79,072           | 86,172           | 150,054          | 1.02%                   | 1.01%        | 1.02%        | 1.02%                  | 1.01%        | 1.02%        | 1.02%                  | 1.01%        | 1.02%        | 1.02%          | 1.01%        | 1.02%        |
| Eastern Asia, other/n.s.    | 13,988                      | 616                      | 1,528            | 8,372            | 3,472            | —                       | —            | —            | —                      | —            | —            | —                      | —            | —            | —              | —            | —            |
| <b>South Eastern Asia</b>   | <b>4,529,616</b>            | <b>1,703,261</b>         | <b>943,756</b>   | <b>964,825</b>   | <b>917,774</b>   |                         |              |              |                        |              |              |                        |              |              |                |              |              |
| Philippines                 | 2,168,566                   | 789,632                  | 424,548          | 519,423          | 434,963          | 9.72%                   | 7.85%        | 11.59%       | 5.00%                  | 1.92%        | 8.08%        | 5.87%                  | 4.82%        | 6.92%        | 1.35%†         | -0.54%       | 3.24%        |
| Vietnam                     | 1,365,908                   | 516,128                  | 369,552          | 237,762          | 242,466          | 12.88%                  | 11.37%       | 14.39%       | 13.50%                 | 11.58%       | 15.42%       | 10.51%                 | 9.42%        | 11.59%       | 9.29%          | 7.86%        | 10.72%       |
| Thailand                    | 289,335                     | 100,878                  | 46,525           | 69,743           | 72,189           | 10.78%                  | 7.60%        | 13.97%       | 4.30%                  | 3.72%        | 4.89%        | 5.73%                  | 4.94%        | 6.52%        | 6.32%          | 3.84%        | 8.81%        |
| Laos                        | 189,131                     | 132,657                  | 26,320           | 19,366           | 10,788           | 14.58%                  | 12.35%       | 16.81%       | 12.03%                 | 5.44%        | 18.61%       | 8.58%                  | 6.47%        | 10.70%       | 5.58%          | 4.43%        | 6.72%        |
| Cambodia                    | 144,093                     | 86,372                   | 15,876           | 24,517           | 17,328           | 13.95%                  | 10.75%       | 17.14%       | 8.31%†                 | 6.31%        | 10.31%       | 7.26%                  | 4.65%        | 9.87%        | 6.28%          | 3.17%        | 9.39%        |
| Indonesia                   | 101,501                     | 29,927                   | 22,887           | 29,450           | 19,237           | 3.89%                   | 2.39%        | 5.38%        | 4.50%                  | 3.45%        | 5.56%        | 2.02%                  | 1.65%        | 2.38%        | 7.28%          | 4.46%        | 10.11%       |
| Myanmar                     | 145,864                     | 16,182                   | 13,475           | 40,392           | 75,815           | —                       | —            | —            | —                      | —            | —            | 10.11%                 | 7.37%        | 12.85%       | 6.69%          | 4.75%        | 8.64%        |
| Malaysia                    | 84,316                      | 22,803                   | 16,366           | 14,898           | 30,249           | 4.91%                   | 3.68%        | 6.14%        | 4.44%                  | 1.32%        | 7.56%        | 1.84%                  | 1.09%        | 2.60%        | —              | —            | —            |
| Singapore                   | 40,902                      | 8,682                    | 8,207            | 9,274            | 14,739           | 7.04%                   | 5.83%        | 8.25%        | 3.44%                  | 1.35%        | 5.52%        | 2.70%                  | 2.35%        | 3.05%        | 3.60%          | 2.93%        | 4.27%        |
| <b>South Central Asia</b>   | <b>4,264,431</b>            | <b>759,093</b>           | <b>728,500</b>   | <b>1,089,574</b> | <b>1,687,264</b> |                         |              |              |                        |              |              |                        |              |              |                |              |              |
| India                       | 2,670,106                   | 439,902                  | 462,720          | 663,508          | 1,103,976        | 3.31%                   | 2.62%        | 4.00%        | 4.15%                  | 3.45%        | 4.84%        | 1.81%                  | 1.58%        | 2.03%        | 2.17%          | 1.77%        | 2.57%        |
| Iran                        | 397,203                     | 174,599                  | 52,800           | 81,506           | 88,298           | 2.44%                   | 2.01%        | 2.88%        | 2.20%                  | 1.72%        | 2.68%        | 3.17%                  | 2.33%        | 4.00%        | 1.25%          | 0.97%        | 1.52%        |
| Pakistan                    | 400,978                     | 73,441                   | 91,215           | 120,643          | 115,679          | 7.28%                   | 2.75%        | 11.82%       | 4.00%                  | 2.48%        | 5.51%        | 3.64%                  | 3.01%        | 4.27%        | 3.61%          | 2.49%        | 4.72%        |
| Bangladesh                  | 281,578                     | 29,555                   | 63,249           | 78,855           | 109,919          | 5.63%                   | 1.52%        | 9.75%        | 4.66%                  | 3.74%        | 5.58%        | 5.36%                  | 2.39%        | 8.34%        | 2.29%          | 0.38%        | 4.19%        |
| Afghanistan                 | 119,003                     | 22,800                   | 10,245           | 16,626           | 69,332           | 4.10%*                  | 2.20%        | 6.00%        | —                      | —            | —            | 5.58%                  | 3.75%        | 7.40%        | 3.16%          | 1.96%        | 4.36%        |
| Uzbekistan                  | 74,008                      | 3,157                    | 17,830           | 19,252           | 33,769           | 5.67%                   | 4.49%        | 6.86%        | 12.70%                 | 9.72%        | 15.67%       | 2.84%                  | -0.09%       | 5.77%        | —              | —            | —            |
| Nepal                       | 151,248                     | 4,209                    | 7,576            | 47,634           | 91,829           | 3.15%                   | 1.50%        | 4.81%        | 1.93%                  | 1.27%        | 2.59%        | 4.28%                  | 0.81%        | 7.74%        | 0.55%          | 0.13%        | 0.98%        |
| Sri Lanka                   | 52,894                      | 9,126                    | 9,120            | 16,406           | 18,242           | —                       | —            | —            | 2.41%                  | -0.72%       | 5.53%        | —                      | —            | —            | —              | —            | —            |
| Kazakhstan                  | 30,431                      | 728                      | 9,238            | 11,110           | 9,355            | 6.34%†                  | 3.98%        | 8.71%        | —                      | —            | —            | 3.75%†                 | 1.57%        | 5.94%        | —              | —            | —            |
| So Central Asia, other/n.s. | 86,982                      | 1,576                    | 4,507            | 34,034           | 46,865           | —                       | —            | —            | —                      | —            | —            | —                      | —            | —            | —              | —            | —            |
| <b>Western Asia</b>         | <b>1,257,218</b>            | <b>285,931</b>           | <b>223,478</b>   | <b>285,478</b>   | <b>462,331</b>   |                         |              |              |                        |              |              |                        |              |              |                |              |              |
| Iraq                        | 250,435                     | 34,837                   | 41,652           | 57,552           | 116,394          | —                       | —            | —            | —                      | —            | —            | 1.42%                  | 0.63%        | 2.22%        | 1.01%          | 0.00%        | 2.03%        |
| Israel                      | 163,156                     | 56,907                   | 25,740           | 37,118           | 43,391           | 2.34%                   | 1.33%        | 3.35%        | 2.28%                  | 0.48%        | 4.08%        | 0.51%*                 | 0.26%        | 0.76%        | 0.61%          | 0.49%        | 0.73%        |
| Lebanon                     | 135,345                     | 64,551                   | 19,205           | 27,573           | 24,016           | 1.70%*                  | 1.18%        | 2.22%        | 1.61%                  | 0.59%        | 2.63%        | 0.99%                  | 0.56%        | 1.42%        | 1.74%†         | 1.59%        | 1.88%        |
| Turkey                      | 150,341                     | 39,787                   | 25,710           | 34,712           | 50,132           | 8.55%                   | 7.61%        | 9.50%        | 5.92%                  | 5.16%        | 6.68%        | 3.95%                  | 3.35%        | 4.55%        | 2.76%          | 2.09%        | 3.43%        |
| Armenia                     | 92,327                      | 17,551                   | 27,388           | 23,407           | 23,981           | —                       | —            | —            | 0.55%                  | 0.17%        | 0.93%        | 1.40%                  | -1.28%       | 4.08%        | 3.16%          | 1.23%        | 5.09%        |
| Syria                       | 113,654                     | 23,936                   | 18,232           | 22,553           | 48,933           | —                       | —            | —            | —                      | —            | —            | 5.62%*                 | 4.82%        | 6.42%        | 1.39%          | 1.14%        | 1.65%        |
| Jordan                      | 87,888                      | 22,464                   | 17,509           | 22,109           | 25,806           | 8.67%                   | 5.55%        | 11.78%       | —                      | —            | —            | 3.13%                  | 0.96%        | 5.30%        | 3.13%          | 0.96%        | 5.30%        |
| Saudi Arabia                | 91,085                      | 6,628                    | 9,046            | 16,045           | 59,366           | 9.33%                   | 8.03%        | 10.62%       | 5.75%                  | 4.57%        | 6.92%        | 3.12%                  | 2.12%        | 4.13%        | 3.09%          | 2.12%        | 4.06%        |
| Yemen                       | 64,556                      | 8,482                    | 10,531           | 16,877           | 28,666           | 12.63%                  | 9.70%        | 15.55%       | 11.10%                 | 7.19%        | 15.01%       | 12.42%                 | 6.41%        | 18.43%       | 4.29%          | 0.02%        | 8.56%        |
| Kuwait                      | 39,318                      | 5,666                    | 8,551            | 9,582            | 15,519           | 2.90%                   | 2.07%        | 3.73%        | —                      | —            | —            | 4.80%*                 | 3.98%        | 5.62%        | 0.34%          | 0.04%        | 0.64%        |
| Azerbaijan                  | 23,015                      | 1,964                    | 9,189            | 5,232            | 6,630            | 2.54%                   | 0.32%        | 4.76%        | 4.10%*                 | 2.76%        | 5.44%        | 3.13%                  | 2.46%        | 3.81%        | 4.38%          | 2.38%        | 6.37%        |
| Georgia                     | 20,125                      | 1,659                    | 6,699            | 4,950            | 6,817            | —                       | —            | —            | —                      | —            | —            | 3.89%                  | 1.25%        | 6.54%        | 3.65%          | 1.67%        | 5.64%        |
| Western Asia, other/n.s.    | 25,973                      | 1,499                    | 4,026            | 7,768            | 12,680           | —                       | —            | —            | —                      | —            | —            | —                      | —            | —            | —              | —            | —            |
| <b>Asia, n.s.</b>           | <b>94,177</b>               | <b>28,665</b>            | <b>15,661</b>    | <b>20,460</b>    | <b>29,391</b>    | —                       | —            | —            | —                      | —            | —            | —                      | —            | —            | —              | —            | —            |

Appendix Table A9a—Continued

| Country/Region               | FB Living in the U.S., 2018 |                          |                  |                  |                  | CHB Prevalence Rate (%) |              |              |                        |              |              |                        |              |              |                |              |              |
|------------------------------|-----------------------------|--------------------------|------------------|------------------|------------------|-------------------------|--------------|--------------|------------------------|--------------|--------------|------------------------|--------------|--------------|----------------|--------------|--------------|
|                              | Total FB                    | Surveys Done before 1990 |                  |                  |                  | Surveys Done 1990–1999  |              |              | Surveys Done 2000–2009 |              |              | Surveys Done 2010–2019 |              |              |                |              |              |
|                              |                             | Entry before 1990        | Entry 1990–1999  | Entry 2000–2009  | Entry 2010–2019  | RE Pooled Rate          | Lower 95% CI | Upper 95% CI | RE Pooled Rate         | Lower 95% CI | Upper 95% CI | RE Pooled Rate         | Lower 95% CI | Upper 95% CI | RE Pooled Rate | Lower 95% CI | Upper 95% CI |
| <b>Americas</b>              | <b>24,410,150</b>           | <b>7,514,243</b>         | <b>5,628,412</b> | <b>6,558,933</b> | <b>4,708,562</b> |                         |              |              |                        |              |              |                        |              |              |                |              |              |
| <b>Central America</b>       | <b>15,275,916</b>           | <b>4,651,113</b>         | <b>3,854,937</b> | <b>4,400,620</b> | <b>2,369,246</b> |                         |              |              |                        |              |              |                        |              |              |                |              |              |
| Mexico                       | 11,549,703                  | 3,668,563                | 3,099,538        | 3,318,852        | 1,462,750        | 2.17%                   | -0.02%       | 4.37%        | 0.21%                  | 0.05%        | 0.38%        | 0.53%                  | 0.34%        | 0.73%        | 0.19%*         | -0.05%       | 0.43%        |
| El Salvador                  | 1,452,848                   | 414,014                  | 321,713          | 397,736          | 319,385          | 1.59%*                  | -0.60%       | 3.77%        | 0.47%                  | 0.34%        | 0.59%        | 0.29%*                 | 0.25%        | 0.33%        | —              | —            | —            |
| Guatemala                    | 1,038,393                   | 195,164                  | 202,436          | 359,266          | 281,527          | 17.30%*                 | 14.27%       | 20.33%       | 1.48%                  | 1.01%        | 1.95%        | 0.18%                  | 0.13%        | 0.24%        | 0.91%*         | 0.02%        | 1.80%        |
| Honduras                     | 663,876                     | 97,225                   | 121,109          | 218,836          | 226,706          | —                       | —            | —            | 0.60%                  | 0.42%        | 0.78%        | 0.39%*                 | 0.33%        | 0.45%        | 0.22%*         | 0.17%        | 0.26%        |
| Nicaragua                    | 270,471                     | 131,181                  | 51,092           | 48,944           | 39,254           | —                       | —            | —            | 0.68%                  | -0.41%       | 1.78%        | —                      | —            | —            | —              | —            | —            |
| Panama                       | 153,402                     | 87,495                   | 30,320           | 22,461           | 13,126           | 1.45%                   | -0.01%       | 2.91%        | 0.77%                  | 0.43%        | 1.11%        | 0.17%*                 | 0.13%        | 0.21%        | 0.79%          | -0.19%       | 1.78%        |
| Costa Rica                   | 96,525                      | 33,066                   | 20,224           | 25,821           | 17,414           | 0.57%†                  | -0.07%       | 1.20%        | —                      | —            | —            | —                      | —            | —            | —              | —            | —            |
| Belize                       | 50,698                      | 24,405                   | 8,505            | 8,704            | 9,084            | —                       | —            | —            | 1.02%                  | 0.06%        | 1.98%        | 1.45%                  | 1.03%        | 1.86%        | —              | —            | —            |
| <b>Caribbean</b>             | <b>4,656,720</b>            | <b>1,536,322</b>         | <b>886,454</b>   | <b>1,045,516</b> | <b>1,188,428</b> |                         |              |              |                        |              |              |                        |              |              |                |              |              |
| Cuba                         | 1,372,576                   | 471,482                  | 201,878          | 316,561          | 382,655          | 0.40%*                  | -0.13%       | 0.93%        | 0.92%                  | 0.52%        | 1.32%        | 1.00%†                 | 0.86%        | 1.13%        | —              | —            | —            |
| Dominican Republic           | 1,234,737                   | 312,804                  | 261,073          | 284,366          | 376,494          | 6.58%                   | 3.53%        | 9.63%        | 5.21%                  | -1.74%       | 12.15%       | 0.95%*                 | 0.36%        | 1.54%        | —              | —            | —            |
| Jamaica                      | 776,242                     | 294,082                  | 154,908          | 170,556          | 156,696          | —                       | —            | —            | 0.39%                  | -0.35%       | 1.13%        | 12.00%                 | 9.22%        | 14.78%       | —              | —            | —            |
| Haiti                        | 718,111                     | 216,058                  | 137,908          | 171,327          | 192,818          | 7.46%                   | 4.54%        | 10.37%       | 5.05%†                 | 4.21%        | 5.89%        | 4.30%                  | 3.33%        | 5.27%        | 2.37%          | 1.05%        | 3.69%        |
| Trinidad and Tobago          | 229,145                     | 94,851                   | 62,256           | 46,848           | 25,190           | —                       | —            | —            | —                      | —            | —            | 0.71%                  | 0.49%        | 0.94%        | —              | —            | —            |
| Barbados                     | 58,522                      | 33,440                   | 11,187           | 7,426            | 6,469            | 1.40%                   | 0.37%        | 2.43%        | 0.40%                  | 0.17%        | 0.63%        | 0.30%                  | 0.12%        | 0.48%        | —              | —            | —            |
| Caribbean, other/n.s.        | 267,387                     | 113,605                  | 57,244           | 48,432           | 48,106           | —                       | —            | —            | —                      | —            | —            | —                      | —            | —            | —              | —            | —            |
| <b>South America</b>         | <b>3,479,059</b>            | <b>894,466</b>           | <b>705,025</b>   | <b>948,783</b>   | <b>930,785</b>   |                         |              |              |                        |              |              |                        |              |              |                |              |              |
| Colombia                     | 825,787                     | 249,193                  | 170,803          | 224,322          | 181,469          | —                       | —            | —            | 7.25%*                 | 1.13%        | 13.37%       | 0.71%                  | -0.06%       | 1.48%        | —              | —            | —            |
| Ecuador                      | 457,873                     | 125,264                  | 105,978          | 130,051          | 96,580           | 0.53%                   | 0.44%        | 0.63%        | 0.41%                  | 0.37%        | 0.45%        | —                      | —            | —            | —              | —            | —            |
| Peru                         | 488,139                     | 126,613                  | 109,119          | 164,157          | 88,250           | 1.85%                   | 0.52%        | 3.18%        | 2.68%                  | 1.67%        | 3.69%        | 0.40%†                 | 0.20%        | 0.61%        | 6.19%*         | 1.39%        | 10.98%       |
| Brazil                       | 513,965                     | 73,402                   | 94,039           | 144,575          | 201,949          | 0.99%                   | 0.35%        | 1.62%        | 2.19%                  | 1.76%        | 2.63%        | 1.32%                  | 1.11%        | 1.53%        | 0.30%          | 0.15%        | 0.45%        |
| Guyana                       | 287,911                     | 112,134                  | 76,426           | 61,493           | 37,858           | —                       | —            | —            | —                      | —            | —            | —                      | —            | —            | 3.96%*         | 2.21%        | 5.70%        |
| Argentina                    | 203,915                     | 68,316                   | 37,284           | 61,862           | 36,453           | 0.46%                   | -0.20%       | 1.13%        | 2.17%†                 | 1.45%        | 2.89%        | 0.23%†                 | 0.10%        | 0.36%        | 0.22%†         | 0.07%        | 0.37%        |
| Venezuela                    | 422,418                     | 46,830                   | 58,032           | 85,362           | 232,194          | 0.86%                   | -0.08%       | 1.80%        | 2.66%                  | 1.79%        | 3.53%        | 0.70%*                 | -0.67%       | 2.07%        | —              | —            | —            |
| Chile                        | 111,774                     | 39,832                   | 22,450           | 23,349           | 26,143           | 0.34%†                  | 0.01%        | 0.67%        | 0.57%†                 | -0.02%       | 1.15%        | —                      | —            | —            | —              | —            | —            |
| Bolivia                      | 85,723                      | 25,856                   | 16,678           | 25,697           | 17,492           | 2.00%                   | -0.24%       | 4.24%        | 5.30%                  | 2.09%        | 8.51%        | 2.80%                  | -3.00%       | 8.59%        | —              | —            | —            |
| Uruguay                      | 50,626                      | 16,260                   | 5,505            | 21,262           | 7,599            | —                       | —            | —            | 0.40%                  | 0.30%        | 0.49%        | 0.31%                  | 0.28%        | 0.34%        | —              | —            | —            |
| Paraguay                     | 20,806                      | 6,158                    | 7,114            | 3,767            | 3,767            | —                       | —            | —            | 0.87%                  | 0.56%        | 1.18%        | 0.37%                  | 0.31%        | 0.43%        | —              | —            | —            |
| South America, other/n.s.    | 10,122                      | 4,608                    | 1,597            | 2,886            | 1,031            | —                       | —            | —            | —                      | —            | —            | —                      | —            | —            | —              | —            | —            |
| <b>Northern America</b>      | <b>980,525</b>              | <b>426,058</b>           | <b>178,111</b>   | <b>158,134</b>   | <b>218,222</b>   |                         |              |              |                        |              |              |                        |              |              |                |              |              |
| Canada                       | 963,388                     | 415,801                  | 176,236          | 155,292          | 216,059          | 0.76%                   | 0.74%        | 0.79%        | 0.76%                  | 0.74%        | 0.79%        | 0.76%                  | 0.74%        | 0.79%        | 0.76%          | 0.74%        | 0.79%        |
| Northern America, other/n.s. | 17,137                      | 10,257                   | 1,875            | 2,842            | 2,163            | 0.76%                   | 0.74%        | 0.79%        | 0.76%                  | 0.74%        | 0.79%        | 0.76%                  | 0.74%        | 0.79%        | 0.76%          | 0.74%        | 0.79%        |
| <b>Americas, n.s.</b>        | <b>17,930</b>               | <b>6,284</b>             | <b>3,885</b>     | <b>5,880</b>     | <b>1,881</b>     | —                       | —            | —            | —                      | —            | —            | —                      | —            | —            | —              | —            | —            |
| <b>Oceania</b>               | <b>297,510</b>              | <b>74,221</b>            | <b>52,437</b>    | <b>79,955</b>    | <b>90,897</b>    |                         |              |              |                        |              |              |                        |              |              |                |              |              |
| Australia                    | 107,071                     | 24,973                   | 14,723           | 25,985           | 41,390           | 0.37%                   | 0.36%        | 0.38%        | 0.37%                  | 0.36%        | 0.38%        | 0.37%                  | 0.36%        | 0.38%        | 0.37%          | 0.36%        | 0.38%        |
| New Zealand                  | 36,252                      | 10,686                   | 6,979            | 7,008            | 11,579           | 4.11%                   | 4.04%        | 4.18%        | 4.11%                  | 4.04%        | 4.18%        | 4.11%                  | 4.04%        | 4.18%        | 4.11%          | 4.04%        | 4.18%        |
| Fiji                         | 49,573                      | 13,498                   | 12,603           | 14,511           | 8,961            | 7.52%                   | 3.00%        | 12.03%       | 4.19%                  | 2.16%        | 6.22%        | 2.70%                  | 0.49%        | 4.90%        | 2.17%*         | 1.55%        | 2.78%        |
| Tonga                        | 17,636                      | 8,216                    | 2,838            | 4,720            | 1,862            | 20.36%                  | 15.47%       | 25.25%       | 11.31%                 | 6.85%        | 15.78%       | 8.97%                  | 3.30%        | 14.65%       | —              | —            | —            |
| Micronesia                   | 32,438                      | 1,594                    | 4,583            | 12,677           | 13,584           | 20.47%                  | 16.01%       | 24.93%       | 15.06%                 | 2.17%        | 27.95%       | 4.84%                  | 2.90%        | 6.77%        | —              | —            | —            |
| Samoa                        | 12,682                      | 6,237                    | 3,190            | 2,719            | 536              | 4.73%                   | 2.08%        | 7.37%        | 4.50%†                 | 4.21%        | 4.79%        | 3.19%                  | 2.65%        | 3.74%        | —              | —            | —            |
| Oceania, n.s.                | 41,858                      | 9,017                    | 7,521            | 12,335           | 12,985           | —                       | —            | —            | —                      | —            | —            | —                      | —            | —            | —              | —            | —            |

Appendix Table A9a—Continued

| Country/Region              | FB Living in the U.S., 2018 |                          |                 |                 |                 | CHB Prevalence Rate (%) |              |              |                        |              |              |                        |              |              |                |              |              |
|-----------------------------|-----------------------------|--------------------------|-----------------|-----------------|-----------------|-------------------------|--------------|--------------|------------------------|--------------|--------------|------------------------|--------------|--------------|----------------|--------------|--------------|
|                             | Total FB                    | Surveys Done before 1990 |                 |                 |                 | Surveys Done 1990–1999  |              |              | Surveys Done 2000–2009 |              |              | Surveys Done 2010–2019 |              |              |                |              |              |
|                             |                             | Entry before 1990        | Entry 1990–1999 | Entry 2000–2009 | Entry 2010–2019 | RE Pooled Rate          | Lower 95% CI | Upper 95% CI | RE Pooled Rate         | Lower 95% CI | Upper 95% CI | RE Pooled Rate         | Lower 95% CI | Upper 95% CI | RE Pooled Rate | Lower 95% CI | Upper 95% CI |
| <b>Africa</b>               | <b>2,575,550</b>            | <b>354,995</b>           | <b>422,418</b>  | <b>833,522</b>  | <b>964,615</b>  |                         |              |              |                        |              |              |                        |              |              |                |              |              |
| <b>Eastern Africa</b>       | <b>741,178</b>              | <b>65,266</b>            | <b>113,674</b>  | <b>282,981</b>  | <b>279,257</b>  |                         |              |              |                        |              |              |                        |              |              |                |              |              |
| Ethiopia                    | 295,970                     | 26,201                   | 45,888          | 108,627         | 115,254         | 10.37%                  | 8.64%        | 12.10%       | 10.10%                 | 6.62%        | 13.58%       | 5.03%                  | 2.83%        | 7.23%        | 5.57%          | 4.68%        | 6.45%        |
| Kenya                       | 163,398                     | 12,415                   | 23,448          | 72,641          | 54,894          | 5.38%                   | 3.95%        | 6.80%        | —                      | —            | —            | 7.57%                  | 3.54%        | 11.61%       | 3.83%*         | 1.61%        | 6.05%        |
| Somalia                     | 101,011                     | 2,111                    | 20,157          | 45,256          | 33,487          | 12.07%                  | 7.12%        | 17.03%       | 19.76%                 | 15.84%       | 23.69%       | 8.04%                  | 1.10%        | 14.98%       | 7.07%          | 2.08%        | 12.06%       |
| Uganda                      | 35,836                      | 4,976                    | 3,864           | 9,196           | 17,800          | 8.20%                   | 5.71%        | 10.69%       | 6.86%                  | 3.05%        | 10.67%       | 10.08%                 | 6.23%        | 13.93%       | 10.69%         | 4.39%        | 16.99%       |
| Eritrea                     | 45,878                      | 6,098                    | 4,255           | 12,805          | 22,720          | —                       | —            | —            | 15.52%                 | 2.02%        | 29.02%       | —                      | —            | —            | 6.17%          | 1.96%        | 10.39%       |
| Tanzania                    | 21,483                      | 4,484                    | 4,371           | 8,992           | 3,636           | 6.80%                   | 4.68%        | 8.93%        | 5.53%                  | 4.03%        | 7.04%        | 5.08%                  | 1.57%        | 8.59%        | 6.50%          | 4.49%        | 8.51%        |
| Zimbabwe                    | 29,875                      | 5,138                    | 6,306           | 8,967           | 9,464           | 14.68%                  | 11.70%       | 17.66%       | 12.94%                 | 5.64%        | 20.24%       | 7.20%                  | 3.21%        | 11.19%       | —              | —            | —            |
| Eastern Africa, other/n.s.  | 47,727                      | 3,843                    | 5,385           | 16,497          | 22,002          | —                       | —            | —            | —                      | —            | —            | —                      | —            | —            | —              | —            | —            |
| <b>Middle Africa</b>        | <b>162,788</b>              | <b>9,346</b>             | <b>9,265</b>    | <b>47,242</b>   | <b>96,935</b>   |                         |              |              |                        |              |              |                        |              |              |                |              |              |
| Cameroon                    | 81,190                      | 4,329                    | 5,879           | 30,034          | 40,948          | 14.51%                  | 9.57%        | 19.46%       | 7.57%                  | 5.59%        | 9.54%        | 13.49%                 | 0.00%        | 26.99%       | 7.82%          | 5.54%        | 10.10%       |
| Middle Africa, other/n.s.   | 81,598                      | 5,017                    | 3,386           | 17,208          | 55,987          | 14.51%                  | 9.57%        | 19.46%       | 7.57%                  | 5.59%        | 9.54%        | 13.49%                 | 0.00%        | 26.99%       | 7.82%          | 5.54%        | 10.10%       |
| <b>Northern Africa</b>      | <b>433,036</b>              | <b>87,906</b>            | <b>77,182</b>   | <b>121,856</b>  | <b>146,092</b>  |                         |              |              |                        |              |              |                        |              |              |                |              |              |
| Egypt                       | 224,905                     | 52,742                   | 38,558          | 53,537          | 80,068          | 7.21%                   | 5.60%        | 8.82%        | 3.54%                  | 2.74%        | 4.34%        | 6.05%                  | 3.17%        | 8.94%        | 2.60%          | 1.57%        | 3.64%        |
| Morocco                     | 84,690                      | 16,482                   | 16,355          | 26,600          | 25,253          | 4.51%                   | 2.92%        | 6.10%        | 1.54%*                 | 1.26%        | 1.82%        | 1.61%                  | 0.95%        | 2.26%        | 1.79%          | 1.13%        | 2.46%        |
| Sudan                       | 70,223                      | 4,977                    | 14,025          | 30,667          | 20,554          | 22.23%                  | 19.18%       | 25.27%       | 7.91%†                 | 5.28%        | 10.53%       | 5.22%                  | 4.36%        | 6.09%        | 7.15%          | 4.63%        | 9.68%        |
| Algeria                     | 23,307                      | 4,356                    | 3,889           | 3,782           | 11,280          | 8.79%†                  | 4.63%        | 12.96%       | 1.60%*                 | 0.68%        | 2.52%        | —                      | —            | —            | —              | —            | —            |
| Northern Africa, other/n.s. | 29,911                      | 9,349                    | 4,355           | 7,270           | 8,937           | —                       | —            | —            | —                      | —            | —            | —                      | —            | —            | —              | —            | —            |
| <b>Southern Africa</b>      | <b>128,640</b>              | <b>30,900</b>            | <b>29,436</b>   | <b>34,683</b>   | <b>33,621</b>   |                         |              |              |                        |              |              |                        |              |              |                |              |              |
| South Africa                | 108,660                     | 26,937                   | 26,934          | 26,781          | 28,008          | 6.50%                   | 4.60%        | 8.40%        | 5.40%                  | 3.32%        | 7.49%        | 4.99%                  | 2.29%        | 7.68%        | 3.30%          | 1.52%        | 5.09%        |
| Southern Africa, other/n.s. | 19,980                      | 3,963                    | 2,502           | 7,902           | 5,613           | 6.50%                   | 4.60%        | 8.40%        | 5.40%                  | 3.32%        | 7.49%        | 4.99%                  | 2.29%        | 7.68%        | 3.30%          | 1.52%        | 5.09%        |
| <b>Western Africa</b>       | <b>960,077</b>              | <b>134,379</b>           | <b>174,821</b>  | <b>301,837</b>  | <b>349,040</b>  |                         |              |              |                        |              |              |                        |              |              |                |              |              |
| Nigeria                     | 397,555                     | 53,552                   | 68,513          | 111,085         | 164,405         | 11.35%                  | 8.64%        | 14.06%       | 18.03%                 | 14.31%       | 21.75%       | 9.82%                  | 8.03%        | 11.62%       | 7.50%          | 6.45%        | 8.54%        |
| Ghana                       | 205,277                     | 30,220                   | 36,024          | 72,893          | 66,140          | —                       | —            | —            | 12.58%                 | 5.30%        | 19.87%       | 12.31%                 | 9.18%        | 15.44%       | 6.85%          | 4.54%        | 9.16%        |
| Liberia                     | 90,793                      | 13,442                   | 19,592          | 32,870          | 24,889          | 18.14%                  | 10.62%       | 25.65%       | 15.00%                 | 11.27%       | 18.73%       | 12.20%                 | 9.12%        | 15.28%       | —              | —            | —            |
| Cape Verde                  | 38,435                      | 15,158                   | 6,658           | 7,377           | 9,242           | 5.65%                   | 0.16%        | 11.14%       | —                      | —            | —            | —                      | —            | —            | —              | —            | —            |
| Sierra Leone                | 54,671                      | 10,372                   | 12,922          | 16,935          | 14,442          | —                       | —            | —            | 13.49%                 | 7.05%        | 19.92%       | 10.08%                 | 5.61%        | 14.55%       | 13.68%         | 11.23%       | 16.13%       |
| Senegal                     | 32,863                      | 3,721                    | 7,262           | 8,957           | 12,923          | 11.72%                  | 9.51%        | 13.92%       | 13.03%                 | 7.87%        | 18.18%       | 12.32%                 | 10.08%       | 14.56%       | 11.75%         | 7.13%        | 16.38%       |
| Guinea                      | 22,337                      | 2,074                    | 3,912           | 7,067           | 9,284           | 18.20%*                 | 15.47%       | 20.93%       | 15.38%†                | 13.39%       | 17.37%       | 13.47%                 | 11.77%       | 15.17%       | —              | —            | —            |
| Western Africa, other/n.s.  | 118,146                     | 5,840                    | 19,938          | 44,653          | 47,715          | —                       | —            | —            | —                      | —            | —            | —                      | —            | —            | —              | —            | —            |
| <b>Africa, n.s.</b>         | <b>149,831</b>              | <b>27,198</b>            | <b>18,040</b>   | <b>44,923</b>   | <b>59,670</b>   | <b>—</b>                | <b>—</b>     | <b>—</b>     | <b>—</b>               | <b>—</b>     | <b>—</b>     | <b>—</b>               | <b>—</b>     | <b>—</b>     | <b>—</b>       | <b>—</b>     | <b>—</b>     |

Appendix Table A9a—Continued

| Country/Region                 | FB Living in the U.S., 2018 |                          |                  |                  |                 | CHB Prevalence Rate (%) |              |              |                        |              |              |                        |              |              |                |              |              |
|--------------------------------|-----------------------------|--------------------------|------------------|------------------|-----------------|-------------------------|--------------|--------------|------------------------|--------------|--------------|------------------------|--------------|--------------|----------------|--------------|--------------|
|                                | Total FB                    | Surveys Done before 1990 |                  |                  |                 | Surveys Done 1990–1999  |              |              | Surveys Done 2000–2009 |              |              | Surveys Done 2010–2019 |              |              |                |              |              |
|                                |                             | Entry before 1990        | Entry 1990–1999  | Entry 2000–2009  | Entry 2010–2019 | RE Pooled Rate          | Lower 95% CI | Upper 95% CI | RE Pooled Rate         | Lower 95% CI | Upper 95% CI | RE Pooled Rate         | Lower 95% CI | Upper 95% CI | RE Pooled Rate | Lower 95% CI | Upper 95% CI |
| <b>Europe</b>                  | <b>5,894,567</b>            | <b>2,646,881</b>         | <b>1,214,654</b> | <b>1,038,441</b> | <b>994,591</b>  |                         |              |              |                        |              |              |                        |              |              |                |              |              |
| <b>Eastern Europe</b>          | <b>2,166,197</b>            | <b>522,169</b>           | <b>708,413</b>   | <b>573,738</b>   | <b>361,877</b>  |                         |              |              |                        |              |              |                        |              |              |                |              |              |
| Poland                         | 415,200                     | 163,303                  | 123,128          | 95,871           | 32,898          | 2.38%                   | 1.22%        | 3.53%        | 1.21%                  | 0.86%        | 1.55%        | 1.37%                  | 0.76%        | 1.99%        | 0.99%†         | 0.72%        | 1.26%        |
| Russia                         | 396,680                     | 48,493                   | 145,509          | 120,738          | 81,940          | 2.96%                   | 1.83%        | 4.09%        | 3.35%                  | 0.70%        | 6.01%        | 2.50%                  | 1.88%        | 3.12%        | 1.52%          | 0.78%        | 2.26%        |
| Ukraine                        | 343,192                     | 52,939                   | 120,216          | 96,852           | 73,185          | —                       | —            | —            | 1.60%*                 | 0.49%        | 2.71%        | 1.94%                  | 0.57%        | 3.31%        | 0.77%          | 0.66%        | 0.87%        |
| Romania                        | 170,493                     | 50,506                   | 49,371           | 46,081           | 24,535          | 9.80%                   | 6.27%        | 13.34%       | 9.70%                  | 7.41%        | 12.00%       | 5.19%                  | 4.76%        | 5.63%        | 4.70%          | 4.20%        | 5.20%        |
| Yugoslavia                     | 36,223                      | 22,749                   | 6,363            | 4,579            | 2,532           | 4.76%                   | -0.50%       | 10.02%       | 4.26%                  | 0.39%        | 8.13%        | 2.90%                  | 1.47%        | 4.33%        | —              | —            | —            |
| Bosnia and Herzegovina         | 111,510                     | 5,335                    | 69,930           | 30,064           | 6,181           | —                       | —            | —            | —                      | —            | —            | 0.94%                  | 0.74%        | 1.14%        | 2.27%*         | 0.80%        | 3.73%        |
| Hungary                        | 72,307                      | 40,723                   | 9,604            | 11,731           | 10,249          | 0.51%†                  | 0.43%        | 0.58%        | —                      | —            | —            | 1.80%                  | 0.98%        | 2.62%        | —              | —            | —            |
| Albania                        | 95,436                      | 5,946                    | 33,130           | 29,870           | 26,490          | —                       | —            | —            | 14.69%                 | 11.09%       | 18.28%       | 9.35%                  | 8.19%        | 10.51%       | 6.48%†         | 5.79%        | 7.17%        |
| Czech Republic & Slovakia      | 65,787                      | 32,761                   | 12,197           | 11,464           | 9,365           | 0.79%                   | 0.35%        | 1.23%        | 2.01%                  | -1.50%       | 5.52%        | 1.09%                  | 0.10%        | 2.08%        | 4.78%          | 1.36%        | 8.20%        |
| Belarus                        | 74,057                      | 10,344                   | 28,164           | 17,956           | 17,593          | 3.41%                   | 1.69%        | 5.14%        | 2.00%*                 | -0.74%       | 4.74%        | 3.50%*                 | -1.27%       | 8.27%        | 2.02%*         | 0.06%        | 3.98%        |
| Bulgaria                       | 80,429                      | 4,988                    | 24,240           | 34,655           | 16,546          | 2.92%                   | 1.97%        | 3.87%        | 3.90%*                 | 3.09%        | 4.71%        | 9.74%                  | 8.99%        | 10.50%       | 3.42%          | 0.93%        | 5.91%        |
| Moldova                        | 47,170                      | 2,644                    | 11,673           | 16,950           | 15,903          | 9.00%*                  | 7.41%        | 10.59%       | 11.45%                 | 6.45%        | 16.45%       | 8.62%                  | 3.93%        | 13.30%       | —              | —            | —            |
| Croatia                        | 38,807                      | 20,279                   | 10,058           | 4,405            | 4,065           | —                       | —            | —            | 1.47%                  | 0.84%        | 2.10%        | —                      | —            | —            | 0.75%*         | 0.37%        | 1.12%        |
| Former USSR                    | 70,258                      | 14,363                   | 28,785           | 18,071           | 9,039           | 4.66%                   | 3.69%        | 5.63%        | 3.44%                  | 2.01%        | 4.88%        | —                      | —            | —            | —              | —            | —            |
| Lithuania                      | 33,237                      | 9,212                    | 7,261            | 11,472           | 5,292           | —                       | —            | —            | 2.14%*                 | 0.76%        | 3.52%        | 2.02%                  | 1.32%        | 2.72%        | —              | —            | —            |
| Latvia                         | 24,665                      | 8,762                    | 4,600            | 5,105            | 6,198           | —                       | —            | —            | —                      | —            | —            | 1.39%                  | 1.10%        | 1.67%        | —              | —            | —            |
| Macedonia                      | 25,940                      | 11,820                   | 4,115            | 5,465            | 4,540           | —                       | —            | —            | —                      | —            | —            | —                      | —            | —            | 5.75%*         | 3.56%        | 7.93%        |
| Eastern Europe, other/n.s.     | 64,806                      | 17,002                   | 20,069           | 12,409           | 15,326          | —                       | —            | —            | —                      | —            | —            | —                      | —            | —            | —              | —            | —            |
| <b>Southern Europe</b>         | <b>878,517</b>              | <b>582,569</b>           | <b>83,439</b>    | <b>79,165</b>    | <b>133,344</b>  |                         |              |              |                        |              |              |                        |              |              |                |              |              |
| Italy                          | 394,857                     | 276,117                  | 31,203           | 35,614           | 51,923          | 2.52%                   | 2.49%        | 2.54%        | 2.52%                  | 2.49%        | 2.54%        | 2.52%                  | 2.49%        | 2.54%        | 2.52%          | 2.49%        | 2.54%        |
| Portugal                       | 183,628                     | 139,846                  | 19,198           | 12,171           | 12,413          | 1.02%                   | 0.78%        | 1.31%        | 1.02%                  | 0.78%        | 1.31%        | 1.02%                  | 0.78%        | 1.31%        | 1.02%          | 0.78%        | 1.31%        |
| Greece                         | 141,937                     | 106,872                  | 11,218           | 10,771           | 13,076          | 0.97%                   | 0.95%        | 1.00%        | 0.97%                  | 0.95%        | 1.00%        | 0.97%                  | 0.95%        | 1.00%        | 0.97%          | 0.95%        | 1.00%        |
| Spain                          | 158,095                     | 59,734                   | 21,820           | 20,609           | 55,932          | 0.34%                   | 0.32%        | 0.37%        | 0.34%                  | 0.32%        | 0.37%        | 0.34%                  | 0.32%        | 0.37%        | 0.34%          | 0.32%        | 0.37%        |
| <b>Northern/Western Europe</b> | <b>2,816,583</b>            | <b>1,526,501</b>         | <b>417,737</b>   | <b>378,088</b>   | <b>494,257</b>  |                         |              |              |                        |              |              |                        |              |              |                |              |              |
| United Kingdom                 | 882,828                     | 430,322                  | 138,977          | 141,862          | 171,667         | 0.01%                   | 0.01%        | 0.01%        | 0.01%                  | 0.01%        | 0.01%        | 0.01%                  | 0.01%        | 0.01%        | 0.01%          | 0.01%        | 0.01%        |
| Germany                        | 1,149,413                   | 734,844                  | 163,058          | 123,233          | 128,278         | 0.70%                   | 0.65%        | 0.76%        | 0.70%                  | 0.65%        | 0.76%        | 0.70%                  | 0.65%        | 0.76%        | 0.70%          | 0.65%        | 0.76%        |
| France                         | 253,868                     | 102,272                  | 36,192           | 37,466           | 77,938          | 0.26%                   | 0.25%        | 0.27%        | 0.26%                  | 0.25%        | 0.27%        | 0.26%                  | 0.25%        | 0.27%        | 0.26%          | 0.25%        | 0.27%        |
| Ireland                        | 141,434                     | 73,614                   | 23,928           | 18,225           | 25,667          | 0.03%                   | 0.01%        | 0.07%        | 0.03%                  | 0.01%        | 0.07%        | 0.03%                  | 0.01%        | 0.07%        | 0.03%          | 0.01%        | 0.07%        |
| Netherlands                    | 104,658                     | 54,643                   | 13,916           | 13,766           | 22,333          | 0.40%                   | 0.39%        | 0.41%        | 0.40%                  | 0.39%        | 0.41%        | 0.40%                  | 0.39%        | 0.41%        | 0.40%          | 0.39%        | 0.41%        |
| No./West Europe, other/n.s.    | 284,382                     | 130,806                  | 41,666           | 43,536           | 68,374          | —                       | —            | —            | —                      | —            | —            | —                      | —            | —            | —              | —            | —            |
| <b>Europe, other/n.s.</b>      | <b>33,270</b>               | <b>15,642</b>            | <b>5,065</b>     | <b>7,450</b>     | <b>5,113</b>    | —                       | —            | —            | —                      | —            | —            | —                      | —            | —            | —              | —            | —            |

Appendix Table A9b. CHB Pooled Prevalence Rates and Prevalence of Foreign-Born with CHB Living in the U.S. in 2018 by Country of Origin and Decade of Arrival

| Country/Region | Prevalence of FB with CHB in the U.S. |              |              |                     |              |              |                     |              |              |                     |              |              |                          |              |              |
|----------------|---------------------------------------|--------------|--------------|---------------------|--------------|--------------|---------------------|--------------|--------------|---------------------|--------------|--------------|--------------------------|--------------|--------------|
|                | Entry before 1990                     |              |              | Entry 1990–1999     |              |              | Entry 2000–2009     |              |              | Entry 2010–2019     |              |              | Sum of all Entry Decades |              |              |
|                | Midrange Prevalence                   | Lower 95% CI | Upper 95% CI | Midrange Prevalence | Lower 95% CI | Upper 95% CI | Midrange Prevalence | Lower 95% CI | Upper 95% CI | Midrange Prevalence | Lower 95% CI | Upper 95% CI | Midrange Prevalence      | Lower 95% CI | Upper 95% CI |
| Asia           | 359,415                               | 302,575      | 416,299      | 198,438             | 157,525      | 239,286      | 177,904             | 149,522      | 206,628      | 165,050             | 130,089      | 202,622      | 900,807                  | 739,710      | 1,064,835    |
| Americas       | 198,547                               | 61,515       | 341,752      | 63,396              | 23,839       | 108,897      | 66,687              | 45,366       | 90,073       | 50,777              | 26,518       | 78,113       | 379,406                  | 157,238      | 618,834      |
| Oceania        | 4,372                                 | 2,940        | 5,802        | 2,363               | 1,209        | 3,518        | 2,246               | 1,233        | 3,256        | 1,943               | 1,429        | 2,453        | 10,924                   | 6,811        | 15,030       |
| Africa         | 35,346                                | 23,103       | 47,585       | 46,185              | 31,256       | 61,117       | 68,928              | 39,291       | 98,596       | 62,571              | 43,327       | 81,803       | 213,030                  | 136,978      | 289,101      |
| Europe         | 32,891                                | 24,465       | 41,565       | 27,158              | 15,958       | 38,800       | 21,823              | 15,815       | 28,110       | 12,563              | 8,826        | 16,315       | 94,435                   | 65,063       | 124,790      |
| All regions    | 630,570                               | 414,597      | 853,003      | 337,541             | 229,787      | 451,618      | 337,588             | 251,227      | 426,664      | 292,903             | 210,189      | 381,306      | 1,598,602                | 1,105,800    | 2,112,590    |

Appendix Table A9b—Continued

| Country/Region              | Prevalence of FB with CHB in the U.S. |                |                |                     |                |                |                     |                |                |                     |                |                |                          |                |                  |
|-----------------------------|---------------------------------------|----------------|----------------|---------------------|----------------|----------------|---------------------|----------------|----------------|---------------------|----------------|----------------|--------------------------|----------------|------------------|
|                             | Entry before 1990                     |                |                | Entry 1990–1999     |                |                | Entry 2000–2009     |                |                | Entry 2010–2019     |                |                | Sum of all Entry Decades |                |                  |
|                             | Midrange Prevalence                   | Lower 95% CI   | Upper 95% CI   | Midrange Prevalence | Lower 95% CI   | Upper 95% CI   | Midrange Prevalence | Lower 95% CI   | Upper 95% CI   | Midrange Prevalence | Lower 95% CI   | Upper 95% CI   | Midrange Prevalence      | Lower 95% CI   | Upper 95% CI     |
| <b>Asia</b>                 | <b>359,415</b>                        | <b>302,575</b> | <b>416,299</b> | <b>198,438</b>      | <b>157,525</b> | <b>239,286</b> | <b>177,904</b>      | <b>149,522</b> | <b>206,628</b> | <b>165,050</b>      | <b>130,089</b> | <b>202,622</b> | <b>900,807</b>           | <b>739,710</b> | <b>1,064,835</b> |
| <b>Eastern Asia</b>         | <b>127,824</b>                        | <b>116,260</b> | <b>139,334</b> | <b>78,018</b>       | <b>70,562</b>  | <b>85,393</b>  | <b>71,694</b>       | <b>66,591</b>  | <b>76,782</b>  | <b>75,091</b>       | <b>70,685</b>  | <b>79,569</b>  | <b>352,628</b>           | <b>324,098</b> | <b>381,078</b>   |
| China (including Hong Kong) | 63,098                                | 57,164         | 69,032         | 53,440              | 48,489         | 58,340         | 54,177              | 50,968         | 57,386         | 60,389              | 58,593         | 62,271         | 231,103                  | 215,213        | 247,028          |
| Taiwan                      | 28,279                                | 27,548         | 29,029         | 12,499              | 11,767         | 13,232         | 6,657               | 6,057          | 7,250          | 7,039               | 5,644          | 8,433          | 54,474                   | 51,016         | 57,944           |
| Korea                       | 33,893                                | 29,023         | 38,714         | 11,138              | 9,386          | 12,868         | 9,388               | 8,144          | 10,632         | 5,927               | 4,738          | 7,116          | 60,346                   | 51,291         | 69,330           |
| Japan                       | 2,501                                 | 2,477          | 2,501          | 807                 | 799            | 807            | 879                 | 870            | 879            | 1,531               | 1,516          | 1,531          | 5,717                    | 5,661          | 5,717            |
| Eastern Asia, other/n.s.    | 53                                    | 48             | 58             | 134                 | 121            | 147            | 594                 | 551            | 635            | 207                 | 195            | 219            | 988                      | 916            | 1,060            |
| <b>South Eastern Asia</b>   | <b>190,025</b>                        | <b>157,258</b> | <b>222,791</b> | <b>81,004</b>       | <b>57,219</b>  | <b>104,793</b> | <b>68,120</b>       | <b>57,115</b>  | <b>79,101</b>  | <b>42,209</b>       | <b>28,078</b>  | <b>58,708</b>  | <b>381,359</b>           | <b>299,670</b> | <b>465,394</b>   |
| Philippines                 | 76,752                                | 61,986         | 91,518         | 21,227              | 8,151          | 34,303         | 30,490              | 25,036         | 35,944         | 5,872               | 0              | 14,093         | 134,342                  | 95,174         | 175,859          |
| Vietnam                     | 66,477                                | 58,684         | 74,271         | 49,890              | 42,794         | 56,985         | 24,989              | 22,397         | 27,557         | 22,525              | 19,058         | 25,992         | 163,881                  | 142,933        | 184,805          |
| Thailand                    | 10,875                                | 7,667          | 14,093         | 2,001               | 1,731          | 2,275          | 3,996               | 3,445          | 4,547          | 4,562               | 2,772          | 6,360          | 21,434                   | 15,615         | 27,275           |
| Laos                        | 19,341                                | 16,383         | 22,300         | 3,166               | 1,432          | 4,898          | 1,662               | 1,253          | 2,072          | 602                 | 478            | 725            | 24,771                   | 19,546         | 29,995           |
| Cambodia                    | 12,049                                | 9,285          | 14,804         | 1,319               | 1,002          | 1,637          | 1,780               | 1,140          | 2,420          | 1,088               | 549            | 1,627          | 16,236                   | 11,976         | 20,488           |
| Indonesia                   | 1,164                                 | 715            | 1,610          | 1,030               | 790            | 1,273          | 595                 | 486            | 701            | 1,400               | 858            | 1,945          | 4,189                    | 2,849          | 5,528            |
| Myanmar                     | 1,636                                 | 1,193          | 2,079          | 1,362               | 993            | 1,732          | 4,084               | 2,977          | 5,190          | 5,072               | 3,601          | 6,550          | 12,154                   | 8,764          | 15,552           |
| Malaysia                    | 1,120                                 | 839            | 1,400          | 727                 | 216            | 1,237          | 274                 | 162            | 387            | 557                 | 330            | 786            | 2,677                    | 1,547          | 3,811            |
| Singapore                   | 611                                   | 506            | 716            | 282                 | 111            | 453            | 250                 | 218            | 283            | 531                 | 432            | 629            | 1,675                    | 1,267          | 2,082            |
| <b>South Central Asia</b>   | <b>27,401</b>                         | <b>18,277</b>  | <b>36,618</b>  | <b>30,699</b>       | <b>24,007</b>  | <b>37,399</b>  | <b>28,425</b>       | <b>19,698</b>  | <b>37,217</b>  | <b>37,234</b>       | <b>26,042</b>  | <b>48,565</b>  | <b>123,759</b>           | <b>88,024</b>  | <b>159,798</b>   |
| India                       | 14,561                                | 11,525         | 17,596         | 19,203              | 15,964         | 22,396         | 12,009              | 10,483         | 13,469         | 23,956              | 19,540         | 28,372         | 69,729                   | 57,513         | 81,833           |
| Iran                        | 4,260                                 | 3,509          | 5,028          | 1,162               | 908            | 1,415          | 2,584               | 1,899          | 3,260          | 1,104               | 856            | 1,342          | 9,109                    | 7,173          | 11,046           |
| Pakistan                    | 5,347                                 | 2,020          | 8,681          | 3,649               | 2,262          | 5,026          | 4,391               | 3,631          | 5,151          | 4,176               | 2,880          | 5,460          | 17,563                   | 10,794         | 24,318           |
| Bangladesh                  | 1,664                                 | 449            | 2,882          | 2,947               | 2,366          | 3,529          | 4,227               | 1,885          | 6,577          | 2,517               | 418            | 4,606          | 11,355                   | 5,117          | 17,593           |
| Afghanistan                 | 935                                   | 502            | 1,368          | 572                 | 384            | 758            | 928                 | 623            | 1,230          | 2,191               | 1,359          | 3,023          | 4,625                    | 2,868          | 6,379            |
| Uzbekistan                  | 179                                   | 142            | 217            | 2,264               | 1,733          | 2,794          | 547                 | 0              | 1,111          | 959                 | 0              | 1,948          | 3,949                    | 1,875          | 6,070            |
| Nepal                       | 133                                   | 63             | 202            | 146                 | 96             | 196            | 2,039               | 386            | 3,687          | 505                 | 119            | 900            | 2,823                    | 665            | 4,985            |
| Sri Lanka                   | 220                                   | 0              | 505            | 220                 | 0              | 504            | 395                 | 0              | 907            | 440                 | 0              | 1,009          | 1,275                    | 0              | 2,925            |
| Kazakhstan                  | 46                                    | 29             | 63             | 346                 | 145            | 549            | 417                 | 174            | 660            | 351                 | 147            | 556            | 1,160                    | 495            | 1,828            |
| So Central Asia, other/n.s. | 57                                    | 38             | 76             | 190                 | 149            | 231            | 888                 | 616            | 1,164          | 1,036               | 722            | 1,350          | 2,171                    | 1,524          | 2,821            |
| <b>Western Asia</b>         | <b>11,745</b>                         | <b>8,741</b>   | <b>14,752</b>  | <b>7,607</b>        | <b>4,855</b>   | <b>10,363</b>  | <b>8,585</b>        | <b>5,212</b>   | <b>12,274</b>  | <b>9,401</b>        | <b>4,405</b>   | <b>14,412</b>  | <b>37,337</b>            | <b>23,213</b>  | <b>51,801</b>    |
| Iraq                        | 495                                   | 219            | 773            | 591                 | 262            | 925            | 817                 | 363            | 1,278          | 1,176               | 0              | 2,363          | 3,079                    | 844            | 5,339            |
| Israel                      | 1,332                                 | 757            | 1,906          | 587                 | 124            | 1,050          | 189                 | 97             | 282            | 265                 | 213            | 317            | 2,372                    | 1,190          | 3,555            |
| Lebanon                     | 1,097                                 | 762            | 1,433          | 309                 | 113            | 505            | 273                 | 154            | 392            | 418                 | 382            | 452            | 2,097                    | 1,411          | 2,781            |
| Turkey                      | 3,402                                 | 3,028          | 3,780          | 1,522               | 1,327          | 1,717          | 1,371               | 1,163          | 1,579          | 1,384               | 1,048          | 1,720          | 7,679                    | 6,565          | 8,796            |
| Armenia                     | 97                                    | 30             | 163            | 151                 | 47             | 255            | 328                 | 0              | 955            | 758                 | 295            | 1,221          | 1,333                    | 371            | 2,594            |
| Syria                       | 1,345                                 | 1,154          | 1,537          | 1,025               | 879            | 1,170          | 1,267               | 1,087          | 1,448          | 680                 | 558            | 807            | 4,317                    | 3,677          | 4,962            |
| Jordan                      | 1,948                                 | 1,247          | 2,646          | 548                 | 168            | 928            | 692                 | 212            | 1,172          | 808                 | 248            | 1,368          | 3,995                    | 1,875          | 6,114            |
| Saudi Arabia                | 618                                   | 532            | 704            | 520                 | 413            | 626            | 501                 | 340            | 663            | 1,834               | 1,259          | 2,410          | 3,474                    | 2,544          | 4,403            |
| Yemen                       | 1,071                                 | 823            | 1,319          | 1,169               | 757            | 1,581          | 2,096               | 1,082          | 3,110          | 1,230               | 6              | 2,454          | 5,566                    | 2,667          | 8,464            |
| Kuwait                      | 164                                   | 117            | 211            | 410                 | 340            | 481            | 460                 | 381            | 539            | 53                  | 6              | 99             | 1,087                    | 845            | 1,330            |
| Azerbaijan                  | 50                                    | 6              | 93             | 377                 | 254            | 500            | 164                 | 129            | 199            | 290                 | 158            | 422            | 881                      | 546            | 1,215            |
| Georgia                     | 65                                    | 21             | 108            | 261                 | 84             | 438            | 193                 | 62             | 324            | 249                 | 114            | 384            | 767                      | 280            | 1,255            |
| Western Asia, other/n.s.    | 62                                    | 46             | 77             | 137                 | 87             | 187            | 234                 | 142            | 334            | 257                 | 120            | 396            | 690                      | 396            | 994              |
| <b>Asia, n.s.</b>           | <b>2,419</b>                          | <b>2,038</b>   | <b>2,803</b>   | <b>1,110</b>        | <b>882</b>     | <b>1,339</b>   | <b>1,080</b>        | <b>906</b>     | <b>1,252</b>   | <b>1,114</b>        | <b>879</b>     | <b>1,367</b>   | <b>5,724</b>             | <b>4,705</b>   | <b>6,761</b>     |

Appendix Table A9b—Continued

| Country/Region               | Prevalence of FB with CHB in the U.S. |               |                |                     |               |                |                     |               |               |                     |               |               |                          |                |                |
|------------------------------|---------------------------------------|---------------|----------------|---------------------|---------------|----------------|---------------------|---------------|---------------|---------------------|---------------|---------------|--------------------------|----------------|----------------|
|                              | Entry before 1990                     |               |                | Entry 1990–1999     |               |                | Entry 2000–2009     |               |               | Entry 2010–2019     |               |               | Sum of all Entry Decades |                |                |
|                              | Midrange Prevalence                   | Lower 95% CI  | Upper 95% CI   | Midrange Prevalence | Lower 95% CI  | Upper 95% CI   | Midrange Prevalence | Lower 95% CI  | Upper 95% CI  | Midrange Prevalence | Lower 95% CI  | Upper 95% CI  | Midrange Prevalence      | Lower 95% CI   | Upper 95% CI   |
| <b>Americas</b>              | <b>198,547</b>                        | <b>61,515</b> | <b>341,752</b> | <b>63,396</b>       | <b>23,839</b> | <b>108,897</b> | <b>66,687</b>       | <b>45,366</b> | <b>90,073</b> | <b>50,777</b>       | <b>26,518</b> | <b>78,113</b> | <b>379,406</b>           | <b>157,238</b> | <b>618,834</b> |
| <b>Central America</b>       | 123,135                               | 28,273        | 222,121        | 12,527              | 5,332         | 20,226         | 20,888              | 13,586        | 28,777        | 7,368               | 1,334         | 14,311        | 163,918                  | 48,525         | 285,435        |
| Mexico                       | 79,608                                | 0             | 160,316        | 6,509               | 1,550         | 11,778         | 17,590              | 11,284        | 24,228        | 2,779               | 0             | 6,290         | 106,486                  | 12,834         | 202,612        |
| El Salvador                  | 6,583                                 | 0             | 15,608         | 1,512               | 1,094         | 1,898          | 1,153               | 994           | 1,313         | 926                 | 798           | 1,054         | 10,175                   | 2,887          | 19,873         |
| Guatemala                    | 33,763                                | 27,850        | 39,677         | 2,996               | 2,045         | 3,948          | 647                 | 467           | 862           | 2,562               | 56            | 5,067         | 39,968                   | 30,418         | 49,554         |
| Honduras                     | 583                                   | 408           | 758            | 727                 | 509           | 945            | 853                 | 722           | 985           | 499                 | 385           | 589           | 2,662                    | 2,025          | 3,277          |
| Nicaragua                    | 892                                   | 0             | 2,335          | 347                 | 0             | 909            | 333                 | 0             | 871           | 267                 | 0             | 699           | 1,839                    | 0              | 4,814          |
| Panama                       | 1,269                                 | 0             | 2,546          | 233                 | 130           | 337            | 38                  | 29            | 47            | 104                 | 0             | 234           | 1,644                    | 160            | 3,163          |
| Costa Rica                   | 188                                   | 0             | 397            | 115                 | 0             | 243            | 147                 | 0             | 310           | 99                  | 0             | 209           | 550                      | 0              | 1,158          |
| Belize                       | 249                                   | 15            | 483            | 87                  | 5             | 168            | 126                 | 90            | 162           | 132                 | 94            | 169           | 594                      | 203            | 982            |
| <b>Caribbean</b>             | <b>44,135</b>                         | <b>23,155</b> | <b>66,882</b>  | <b>25,140</b>       | <b>7,678</b>  | <b>48,017</b>  | <b>35,712</b>       | <b>26,650</b> | <b>44,742</b> | <b>30,084</b>       | <b>20,773</b> | <b>39,358</b> | <b>135,071</b>           | <b>78,256</b>  | <b>198,999</b> |
| Cuba                         | 1,886                                 | 0             | 4,385          | 1,857               | 1,050         | 2,665          | 3,166               | 2,722         | 3,577         | 3,827               | 3,291         | 4,324         | 10,735                   | 7,063          | 14,951         |
| Dominican Republic           | 20,583                                | 11,042        | 30,123         | 13,602              | 0             | 31,720         | 2,701               | 1,024         | 4,379         | 1,468               | 38            | 2,899         | 38,354                   | 12,103         | 69,122         |
| Jamaica                      | 1,147                                 | 0             | 3,323          | 604                 | 0             | 1,750          | 20,467              | 15,725        | 25,208        | 18,804              | 14,447        | 23,160        | 41,021                   | 30,173         | 53,441         |
| Haiti                        | 16,118                                | 9,809         | 22,405         | 6,964               | 5,806         | 8,123          | 7,367               | 5,705         | 9,029         | 4,570               | 2,025         | 7,115         | 35,019                   | 23,345         | 46,672         |
| Trinidad and Tobago          | 673                                   | 465           | 892            | 442                 | 305           | 585            | 333                 | 230           | 440           | 179                 | 123           | 237           | 1,627                    | 1,123          | 2,154          |
| Barbados                     | 468                                   | 124           | 813            | 45                  | 19            | 70             | 22                  | 9             | 36            | 19                  | 8             | 31            | 555                      | 159            | 950            |
| Caribbean, other/n.s.        | 3,260                                 | 1,715         | 4,942          | 1,626               | 498           | 3,103          | 1,656               | 1,235         | 2,073         | 1,217               | 842           | 1,592         | 7,760                    | 4,290          | 11,710         |
| <b>South America</b>         | <b>27,872</b>                         | <b>6,883</b>  | <b>49,097</b>  | <b>24,332</b>       | <b>9,494</b>  | <b>39,172</b>  | <b>8,825</b>        | <b>3,918</b>  | <b>15,224</b> | <b>11,647</b>       | <b>2,785</b>  | <b>22,689</b> | <b>72,675</b>            | <b>23,081</b>  | <b>126,182</b> |
| Colombia                     | 18,066                                | 2,816         | 33,317         | 12,383              | 1,930         | 22,836         | 1,593               | 0             | 3,320         | 1,288               | 0             | 2,686         | 33,331                   | 4,746          | 62,159         |
| Ecuador                      | 664                                   | 551           | 789            | 435                 | 392           | 477            | 533                 | 481           | 585           | 396                 | 357           | 435           | 2,028                    | 1,782          | 2,286          |
| Peru                         | 2,342                                 | 658           | 4,026          | 2,924               | 1,822         | 4,026          | 657                 | 328           | 1,001         | 5,463               | 1,227         | 9,690         | 11,386                   | 4,036          | 18,744         |
| Brazil                       | 727                                   | 257           | 1,189          | 2,059               | 1,655         | 2,473          | 1,908               | 1,605         | 2,212         | 606                 | 303           | 909           | 5,300                    | 3,820          | 6,783          |
| Guyana                       | 4,441                                 | 2,478         | 6,392          | 3,026               | 1,689         | 4,356          | 2,435               | 1,359         | 3,505         | 1,499               | 837           | 2,158         | 11,401                   | 6,363          | 16,411         |
| Argentina                    | 314                                   | 0             | 772            | 809                 | 541           | 1,078          | 142                 | 62            | 223           | 80                  | 26            | 135           | 1,346                    | 628            | 2,207          |
| Venezuela                    | 403                                   | 0             | 843            | 1,544               | 1,039         | 2,049          | 598                 | 0             | 1,767         | 1,625               | 0             | 4,806         | 4,169                    | 1,039          | 9,465          |
| Chile                        | 135                                   | 4             | 267            | 128                 | 0             | 258            | 133                 | 0             | 269           | 149                 | 0             | 301           | 545                      | 4              | 1,094          |
| Bolivia                      | 517                                   | 0             | 1,096          | 884                 | 349           | 1,419          | 720                 | 0             | 2,207         | 490                 | 0             | 1,503         | 2,610                    | 349            | 6,226          |
| Uruguay                      | 65                                    | 49            | 80             | 22                  | 17            | 27             | 66                  | 60            | 72            | 24                  | 21            | 26            | 177                      | 146            | 205            |
| Paraguay                     | 54                                    | 34            | 73             | 62                  | 40            | 84             | 14                  | 12            | 16            | 14                  | 12            | 16            | 143                      | 98             | 189            |
| South America, other/n.s.    | 144                                   | 35            | 253            | 55                  | 22            | 89             | 27                  | 12            | 46            | 13                  | 3             | 25            | 239                      | 72             | 413            |
| <b>Northern America</b>      | <b>3,238</b>                          | <b>3,153</b>  | <b>3,366</b>   | <b>1,354</b>        | <b>1,318</b>  | <b>1,407</b>   | <b>1,202</b>        | <b>1,170</b>  | <b>1,249</b>  | <b>1,658</b>        | <b>1,615</b>  | <b>1,724</b>  | <b>7,452</b>             | <b>7,256</b>   | <b>7,746</b>   |
| Canada                       | 3,160                                 | 3,077         | 3,285          | 1,339               | 1,304         | 1,392          | 1,180               | 1,149         | 1,227         | 1,642               | 1,599         | 1,707         | 7,322                    | 7,129          | 7,611          |
| Northern America, other/n.s. | 78                                    | 76            | 81             | 14                  | 14            | 15             | 22                  | 21            | 22            | 16                  | 16            | 17            | 130                      | 127            | 135            |
| <b>Americas, n.s.</b>        | <b>166</b>                            | <b>52</b>     | <b>286</b>     | <b>44</b>           | <b>16</b>     | <b>75</b>      | <b>60</b>           | <b>41</b>     | <b>81</b>     | <b>20</b>           | <b>11</b>     | <b>31</b>     | <b>290</b>               | <b>119</b>     | <b>473</b>     |
| <b>Oceania</b>               | <b>4,372</b>                          | <b>2,940</b>  | <b>5,802</b>   | <b>2,363</b>        | <b>1,209</b>  | <b>3,518</b>   | <b>2,246</b>        | <b>1,233</b>  | <b>3,256</b>  | <b>1,943</b>        | <b>1,429</b>  | <b>2,453</b>  | <b>10,924</b>            | <b>6,811</b>   | <b>15,030</b>  |
| Australia                    | 92                                    | 90            | 95             | 54                  | 53            | 56             | 96                  | 94            | 99            | 153                 | 149           | 157           | 396                      | 385            | 407            |
| New Zealand                  | 439                                   | 432           | 447            | 287                 | 282           | 292            | 288                 | 283           | 293           | 476                 | 468           | 484           | 1,490                    | 1,465          | 1,515          |
| Fiji                         | 1,015                                 | 405           | 1,624          | 528                 | 272           | 784            | 392                 | 71            | 711           | 194                 | 139           | 249           | 2,129                    | 887            | 3,368          |
| Tonga                        | 1,673                                 | 1,271         | 2,075          | 321                 | 194           | 448            | 423                 | 156           | 691           | 167                 | 61            | 273           | 2,584                    | 1,683          | 3,487          |
| Micronesia                   | 326                                   | 255           | 397            | 690                 | 99            | 1,281          | 614                 | 368           | 858           | 657                 | 394           | 920           | 2,288                    | 1,116          | 3,456          |
| Samoa                        | 295                                   | 130           | 460            | 144                 | 134           | 153            | 87                  | 72            | 102           | 17                  | 14            | 20            | 542                      | 350            | 734            |
| Oceania, n.s.                | 531                                   | 357           | 705            | 339                 | 174           | 505            | 347                 | 190           | 502           | 278                 | 204           | 351           | 1,495                    | 925            | 2,062          |



Appendix Table A9b—Continued

| Country/Region              | Prevalence of FB with CHB in the U.S. |               |               |                     |               |               |                     |               |               |                     |               |               |                          |                |                |
|-----------------------------|---------------------------------------|---------------|---------------|---------------------|---------------|---------------|---------------------|---------------|---------------|---------------------|---------------|---------------|--------------------------|----------------|----------------|
|                             | Entry before 1990                     |               |               | Entry 1990–1999     |               |               | Entry 2000–2009     |               |               | Entry 2010–2019     |               |               | Sum of all Entry Decades |                |                |
|                             | Midrange Prevalence                   | Lower 95% CI  | Upper 95% CI  | Midrange Prevalence | Lower 95% CI  | Upper 95% CI  | Midrange Prevalence | Lower 95% CI  | Upper 95% CI  | Midrange Prevalence | Lower 95% CI  | Upper 95% CI  | Midrange Prevalence      | Lower 95% CI   | Upper 95% CI   |
| <b>Africa</b>               | <b>35,346</b>                         | <b>23,103</b> | <b>47,585</b> | <b>46,185</b>       | <b>31,256</b> | <b>61,117</b> | <b>68,928</b>       | <b>39,291</b> | <b>98,596</b> | <b>62,571</b>       | <b>43,327</b> | <b>81,803</b> | <b>213,030</b>           | <b>136,978</b> | <b>289,101</b> |
| <b>Eastern Africa</b>       | <b>6,432</b>                          | <b>4,381</b>  | <b>8,483</b>  | <b>12,452</b>       | <b>8,285</b>  | <b>16,620</b> | <b>18,500</b>       | <b>7,855</b>  | <b>29,153</b> | <b>16,404</b>       | <b>9,409</b>  | <b>23,391</b> | <b>53,788</b>            | <b>29,930</b>  | <b>77,646</b>  |
| Ethiopia                    | 2,717                                 | 2,264         | 3,170         | 4,635               | 3,038         | 6,232         | 5,464               | 3,074         | 7,854         | 6,420               | 5,394         | 7,434         | 19,235                   | 13,770         | 24,690         |
| Kenya                       | 668                                   | 490           | 844           | 1,262               | 926           | 1,594         | 5,499               | 2,571         | 8,434         | 2,102               | 884           | 3,321         | 9,531                    | 4,872          | 14,193         |
| Somalia                     | 255                                   | 150           | 360           | 3,983               | 3,193         | 4,775         | 3,639               | 498           | 6,779         | 2,368               | 697           | 4,039         | 10,244                   | 4,538          | 15,953         |
| Uganda                      | 408                                   | 284           | 532           | 265                 | 118           | 412           | 927                 | 573           | 1,281         | 1,903               | 781           | 3,024         | 3,503                    | 1,756          | 5,249          |
| Eritrea                     | 946                                   | 123           | 1,770         | 660                 | 86            | 1,235         | 790                 | 251           | 1,330         | 1,402               | 445           | 2,361         | 3,799                    | 905            | 6,695          |
| Tanzania                    | 305                                   | 210           | 400           | 242                 | 176           | 308           | 457                 | 141           | 772           | 236                 | 163           | 309           | 1,240                    | 690            | 1,790          |
| Zimbabwe                    | 754                                   | 601           | 907           | 816                 | 356           | 1,276         | 646                 | 288           | 1,003         | 681                 | 304           | 1,059         | 2,897                    | 1,548          | 4,246          |
| Eastern Africa, other/n.s.  | 379                                   | 258           | 500           | 590                 | 393           | 787           | 1,079               | 459           | 1,699         | 1,292               | 741           | 1,844         | 3,339                    | 1,851          | 4,830          |
| <b>Middle Africa</b>        | <b>1,356</b>                          | <b>894</b>    | <b>1,819</b>  | <b>701</b>          | <b>518</b>    | <b>884</b>    | <b>6,373</b>        | <b>0</b>      | <b>12,751</b> | <b>7,580</b>        | <b>5,370</b>  | <b>9,790</b>  | <b>16,011</b>            | <b>6,783</b>   | <b>25,244</b>  |
| Cameroon                    | 628                                   | 414           | 842           | 445                 | 329           | 561           | 4,052               | 0             | 8,106         | 3,202               | 2,269         | 4,136         | 8,327                    | 3,011          | 13,645         |
| Middle Africa, other/n.s.   | 728                                   | 480           | 976           | 256                 | 189           | 323           | 2,321               | 0             | 4,644         | 4,378               | 3,102         | 5,655         | 7,684                    | 3,771          | 11,598         |
| <b>Northern Africa</b>      | <b>6,753</b>                          | <b>5,137</b>  | <b>8,369</b>  | <b>2,955</b>        | <b>2,151</b>  | <b>3,758</b>  | <b>5,667</b>        | <b>3,523</b>  | <b>7,816</b>  | <b>4,456</b>        | <b>2,738</b>  | <b>6,189</b>  | <b>19,832</b>            | <b>13,549</b>  | <b>26,132</b>  |
| Egypt                       | 3,803                                 | 2,954         | 4,652         | 1,365               | 1,056         | 1,673         | 3,239               | 1,697         | 4,786         | 2,082               | 1,257         | 2,914         | 10,488                   | 6,964          | 14,026         |
| Morocco                     | 743                                   | 481           | 1,005         | 252                 | 206           | 298           | 428                 | 253           | 601           | 452                 | 285           | 621           | 1,875                    | 1,225          | 2,525          |
| Sudan                       | 1,106                                 | 955           | 1,258         | 1,109               | 741           | 1,477         | 1,601               | 1,337         | 1,868         | 1,470               | 952           | 1,990         | 5,286                    | 3,984          | 6,592          |
| Algeria                     | 383                                   | 202           | 565           | 62                  | 26            | 98            | 61                  | 26            | 95            | 180                 | 77            | 284           | 686                      | 331            | 1,042          |
| Northern Africa, other/n.s. | 718                                   | 546           | 890           | 167                 | 122           | 212           | 338                 | 210           | 466           | 273                 | 167           | 379           | 1,495                    | 1,045          | 1,947          |
| <b>Southern Africa</b>      | <b>2,009</b>                          | <b>1,421</b>  | <b>2,596</b>  | <b>1,590</b>        | <b>977</b>    | <b>2,205</b>  | <b>1,731</b>        | <b>794</b>    | <b>2,664</b>  | <b>1,109</b>        | <b>511</b>    | <b>1,711</b>  | <b>6,438</b>             | <b>3,704</b>   | <b>9,175</b>   |
| South Africa                | 1,751                                 | 1,239         | 2,263         | 1,454               | 894           | 2,017         | 1,336               | 613           | 2,057         | 924                 | 426           | 1,426         | 5,466                    | 3,172          | 7,762          |
| Southern Africa, other/n.s. | 258                                   | 182           | 333           | 135                 | 83            | 187           | 394                 | 181           | 607           | 185                 | 85            | 286           | 972                      | 532            | 1,413          |
| <b>Western Africa</b>       | <b>16,086</b>                         | <b>9,499</b>  | <b>22,674</b> | <b>26,515</b>       | <b>17,990</b> | <b>35,040</b> | <b>32,943</b>       | <b>25,003</b> | <b>40,898</b> | <b>29,148</b>       | <b>22,619</b> | <b>35,662</b> | <b>104,693</b>           | <b>75,112</b>  | <b>134,274</b> |
| Nigeria                     | 6,078                                 | 4,627         | 7,529         | 12,353              | 9,804         | 14,902        | 10,909              | 8,920         | 12,908        | 12,330              | 10,604        | 14,040        | 41,670                   | 33,955         | 49,379         |
| Ghana                       | 3,802                                 | 1,602         | 6,005         | 4,532               | 1,909         | 7,158         | 8,973               | 6,692         | 11,255        | 4,531               | 3,003         | 6,058         | 21,837                   | 13,205         | 30,476         |
| Liberia                     | 2,438                                 | 1,428         | 3,448         | 2,939               | 2,208         | 3,670         | 4,010               | 2,998         | 5,023         | 3,036               | 2,270         | 3,803         | 12,424                   | 8,903          | 15,943         |
| Cape Verde                  | 856                                   | 24            | 1,689         | 376                 | 11            | 742           | 417                 | 12            | 822           | 522                 | 15            | 1,030         | 2,172                    | 61             | 4,282          |
| Sierra Leone                | 1,399                                 | 731           | 2,066         | 1,743               | 911           | 2,574         | 1,707               | 950           | 2,464         | 1,976               | 1,622         | 2,329         | 6,825                    | 4,214          | 9,434          |
| Senegal                     | 436                                   | 354           | 518           | 946                 | 572           | 1,320         | 1,104               | 903           | 1,304         | 1,518               | 921           | 2,117         | 4,004                    | 2,750          | 5,259          |
| Guinea                      | 377                                   | 321           | 434           | 602                 | 524           | 680           | 952                 | 832           | 1,072         | 1,251               | 1,093         | 1,408         | 3,182                    | 2,769          | 3,594          |
| Western Africa, other/n.s.  | 699                                   | 413           | 985           | 3,025               | 2,052         | 3,996         | 4,872               | 3,697         | 6,050         | 3,984               | 3,092         | 4,876         | 12,579                   | 9,254          | 15,908         |
| <b>Africa, n.s.</b>         | <b>2,709</b>                          | <b>1,771</b>  | <b>3,645</b>  | <b>1,972</b>        | <b>1,335</b>  | <b>2,610</b>  | <b>3,715</b>        | <b>2,116</b>  | <b>5,314</b>  | <b>3,873</b>        | <b>2,679</b>  | <b>5,060</b>  | <b>12,268</b>            | <b>7,901</b>   | <b>16,629</b>  |

Appendix Table A9b—Continued

| Country/Region                 | Prevalence of FB with CHB in the U.S. |               |               |                     |               |               |                     |               |               |                     |              |               |                          |               |                |
|--------------------------------|---------------------------------------|---------------|---------------|---------------------|---------------|---------------|---------------------|---------------|---------------|---------------------|--------------|---------------|--------------------------|---------------|----------------|
|                                | Entry before 1990                     |               |               | Entry 1990–1999     |               |               | Entry 2000–2009     |               |               | Entry 2010–2019     |              |               | Sum of all Entry Decades |               |                |
|                                | Midrange Prevalence                   | Lower 95% CI  | Upper 95% CI  | Midrange Prevalence | Lower 95% CI  | Upper 95% CI  | Midrange Prevalence | Lower 95% CI  | Upper 95% CI  | Midrange Prevalence | Lower 95% CI | Upper 95% CI  | Midrange Prevalence      | Lower 95% CI  | Upper 95% CI   |
| <b>Europe</b>                  | <b>32,891</b>                         | <b>24,465</b> | <b>41,565</b> | <b>27,158</b>       | <b>15,958</b> | <b>38,800</b> | <b>21,823</b>       | <b>15,815</b> | <b>28,110</b> | <b>12,563</b>       | <b>8,826</b> | <b>16,315</b> | <b>94,435</b>            | <b>65,063</b> | <b>124,790</b> |
| <b>Eastern Europe</b>          | <b>16,843</b>                         | <b>9,355</b>  | <b>24,429</b> | <b>24,422</b>       | <b>13,434</b> | <b>35,819</b> | <b>19,300</b>       | <b>13,461</b> | <b>25,391</b> | <b>9,333</b>        | <b>5,767</b> | <b>12,888</b> | <b>69,898</b>            | <b>42,018</b> | <b>98,526</b>  |
| Poland                         | 3,887                                 | 1,992         | 5,765         | 1,490               | 1,059         | 1,908         | 1,313               | 729           | 1,908         | 326                 | 237          | 415           | 7,016                    | 4,017         | 9,995          |
| Russia                         | 1,435                                 | 887           | 1,983         | 4,875               | 1,019         | 8,745         | 3,018               | 2,270         | 3,767         | 1,245               | 639          | 1,852         | 10,574                   | 4,815         | 16,347         |
| Ukraine                        | 847                                   | 259           | 1,435         | 1,923               | 589           | 3,258         | 1,879               | 552           | 3,206         | 564                 | 483          | 637           | 5,213                    | 1,884         | 8,535          |
| Romania                        | 4,950                                 | 3,167         | 6,738         | 4,789               | 3,658         | 5,925         | 2,392               | 2,193         | 2,594         | 1,153               | 1,030        | 1,276         | 13,283                   | 10,049        | 16,532         |
| Yugoslavia                     | 1,083                                 | 0             | 2,279         | 271                 | 25            | 517           | 133                 | 67            | 198           | 73                  | 37           | 110           | 1,560                    | 129           | 3,105          |
| Bosnia and Herzegovina         | 50                                    | 39            | 61            | 657                 | 517           | 797           | 283                 | 222           | 343           | 140                 | 49           | 231           | 1,130                    | 829           | 1,431          |
| Hungary                        | 208                                   | 175           | 236           | 173                 | 94            | 252           | 211                 | 115           | 307           | 184                 | 100          | 269           | 776                      | 485           | 1,064          |
| Albania                        | 873                                   | 659           | 1,087         | 4,867               | 3,674         | 6,056         | 2,793               | 2,446         | 3,139         | 1,717               | 1,534        | 1,899         | 10,250                   | 8,314         | 12,182         |
| Czech Republic & Slovakia      | 259                                   | 115           | 403           | 245                 | 0             | 673           | 125                 | 11            | 238           | 448                 | 127          | 768           | 1,077                    | 253           | 2,083          |
| Belarus                        | 353                                   | 175           | 532           | 563                 | 0             | 1,335         | 628                 | 0             | 1,485         | 355                 | 11           | 700           | 1,900                    | 185           | 4,052          |
| Bulgaria                       | 146                                   | 98            | 193           | 945                 | 749           | 1,142         | 3,375               | 3,115         | 3,639         | 566                 | 154          | 978           | 5,032                    | 4,117         | 5,951          |
| Moldova                        | 238                                   | 196           | 280           | 1,337               | 753           | 1,920         | 1,461               | 666           | 2,254         | 1,371               | 625          | 2,115         | 4,406                    | 2,240         | 6,570          |
| Croatia                        | 298                                   | 170           | 426           | 148                 | 84            | 211           | 33                  | 16            | 49            | 30                  | 15           | 46            | 509                      | 286           | 732            |
| Former USSR                    | 669                                   | 530           | 809           | 990                 | 579           | 1,405         | 622                 | 363           | 882           | 311                 | 182          | 441           | 2,592                    | 1,653         | 3,536          |
| Lithuania                      | 197                                   | 70            | 324           | 155                 | 55            | 256           | 232                 | 151           | 312           | 107                 | 70           | 144           | 691                      | 346           | 1,036          |
| Latvia                         | 122                                   | 96            | 146           | 64                  | 51            | 77            | 71                  | 56            | 85            | 86                  | 68           | 104           | 343                      | 271           | 412            |
| Macedonia                      | 680                                   | 421           | 937           | 237                 | 146           | 326           | 314                 | 195           | 433           | 261                 | 162          | 360           | 1,492                    | 923           | 2,057          |
| Eastern Europe, other/n.s.     | 549                                   | 304           | 796           | 692                 | 381           | 1,015         | 417                 | 292           | 550           | 395                 | 244          | 546           | 2,054                    | 1,221         | 2,907          |
| <b>Southern Europe</b>         | <b>9,624</b>                          | <b>9,173</b>  | <b>10,135</b> | <b>1,165</b>        | <b>1,103</b>  | <b>1,237</b>  | <b>1,196</b>        | <b>1,150</b>  | <b>1,248</b>  | <b>1,752</b>        | <b>1,693</b> | <b>1,819</b>  | <b>13,738</b>            | <b>13,119</b> | <b>14,439</b>  |
| Italy                          | 6,958                                 | 6,875         | 7,013         | 786                 | 777           | 793           | 897                 | 887           | 905           | 1,308               | 1,293        | 1,319         | 9,950                    | 9,832         | 10,029         |
| Portugal                       | 1,426                                 | 1,091         | 1,832         | 196                 | 150           | 251           | 124                 | 95            | 159           | 127                 | 97           | 163           | 1,873                    | 1,432         | 2,406          |
| Greece                         | 1,037                                 | 1,015         | 1,069         | 109                 | 107           | 112           | 104                 | 102           | 108           | 127                 | 124          | 131           | 1,377                    | 1,348         | 1,419          |
| Spain                          | 203                                   | 191           | 221           | 74                  | 70            | 81            | 70                  | 66            | 76            | 190                 | 179          | 207           | 538                      | 506           | 585            |
| <b>Northern/Western Europe</b> | <b>6,230</b>                          | <b>5,793</b>  | <b>6,755</b>  | <b>1,458</b>        | <b>1,354</b>  | <b>1,583</b>  | <b>1,170</b>        | <b>1,091</b>  | <b>1,269</b>  | <b>1,413</b>        | <b>1,320</b> | <b>1,524</b>  | <b>10,271</b>            | <b>9,558</b>  | <b>11,131</b>  |
| United Kingdom                 | 43                                    | 43            | 43            | 14                  | 14            | 14            | 14                  | 14            | 14            | 17                  | 17           | 17            | 88                       | 88            | 88             |
| Germany                        | 5,144                                 | 4,776         | 5,585         | 1,141               | 1,060         | 1,239         | 863                 | 801           | 937           | 898                 | 834          | 975           | 8,046                    | 7,471         | 8,736          |
| France                         | 266                                   | 256           | 276           | 94                  | 90            | 98            | 97                  | 94            | 101           | 203                 | 195          | 210           | 660                      | 635           | 685            |
| Ireland                        | 22                                    | 7             | 52            | 7                   | 2             | 17            | 5                   | 2             | 13            | 8                   | 3            | 18            | 42                       | 14            | 99             |
| Netherlands                    | 219                                   | 213           | 224           | 56                  | 54            | 57            | 55                  | 54            | 56            | 89                  | 87           | 92            | 419                      | 408           | 429            |
| No./West Europe, other/n.s.    | 536                                   | 497           | 576           | 146                 | 133           | 158           | 135                 | 126           | 148           | 198                 | 185          | 212           | 1,015                    | 941           | 1,094          |
| <b>Europe, other/n.s.</b>      | <b>194</b>                            | <b>144</b>    | <b>246</b>    | <b>113</b>          | <b>66</b>     | <b>162</b>    | <b>156</b>          | <b>113</b>    | <b>202</b>    | <b>64</b>           | <b>46</b>    | <b>84</b>     | <b>528</b>               | <b>369</b>    | <b>693</b>     |

Abbreviations: CHB, chronic hepatitis B; CI, confidence interval; FB, foreign-born; n.s., not specified; RE, random effects.

†Random effects rate cannot be calculated because  $\tau^2 < 0$ ; fixed effect rate is shown.

\* Only one study available; rates are as reported with 95% CIs from standard error.

If no survey data are available for the decade "Before 1990", the rate from "1990–1999" is used.

If no survey data are available for the decade "2010–2019", the rate from "2000–2009" is used.

Northern America = FB from Canada and Bermuda living in the U.S.

For Japan, northern America, Australia, New Zealand, and southern, northern, and western Europe, which have low CHB rates and relatively modest numbers of emigrants to the U.S., rates from reviews were used instead of rates from systematic review and meta-analyses. Male-specific data and female-specific data from the same survey are entered separately and counted as two surveys.
